# Supplementary material
Source: bioRxiv or medRxiv preprint supplement (https://www.biorxiv.org/highwire/filestream/120061/field_highwire_adjunct_files/0/394270-1.pdf)
Supplement: Supplementary file [file 394270-1.pdf]

## Supplementary File 1

| <b>Protein IDs</b>            |                   |
|-------------------------------|-------------------|
| <b>Presenilin Protien</b>     |                   |
| <b>Species</b>                | <b>Protein Id</b> |
| Homo sapiens                  | NP_000012.1       |
|                               | NP_000438.2       |
| Pan troglodytes               | XP_016781825.1    |
|                               | XP_001142009.2    |
| Bos taurus                    | NP_777146.1       |
|                               | NP_776865.2       |
| Mus musculus                  | NP_032969.1       |
|                               | NP_035313.2       |
| Xenopustropicalis             | NP_001027027.1    |
|                               | NP_001017181.1    |
| Anolis carolinensis           | XP_008102150.1    |
|                               | XP_003216113.1    |
| Daniorerio                    | NP_571099.1       |
|                               | NP_571589.2       |
| Takifugurubripes              | XP_003978532.1    |
|                               | XP_003972298.1    |
| Latimeria chalumnae           | XP_006000568.2    |
|                               | XP_014342519.1    |
| Callorhinchus milii           | XP_007891435.1    |
|                               | XP_007891888.1    |
| Lethenteron japonicum         | XP_006000568.2    |
|                               | XP_014342519.1    |
| Branchiostoma floridae        | XP_002597164.1    |
| Saccoglossus kowalevskii      | XP_002738746.1    |
| Strongylocentrotus purpuratus | XP_001178715.1    |
| Caenorhabditis elegans        | NP_508175.1       |
|                               | NP_491328.1       |
|                               | NP_492095.1       |
| Drosophila melanogaster       | NP_524184.1       |
| Hydra vulgaris                | XP_012561939.1    |
|                               | XP_012562740.1    |
| Amphimedon queenslandica      | XP_019849527.1    |
| Monosiga brevicollis          | XP_001750030.1    |
| Chlamydomonas reinhardtii     | XP_001701664.1    |
| Populus trichocarpa           | XP_006374407.1    |
| Chondrus crispus              | XP_005715796.1    |
| Trypanosoma brucei            | XP_803800         |
| Trichomonas vaginalis         | XP_001326572.1    |
|                               | XP_001312406.1    |
|                               | XP_001299078.1    |
| Rozella allomycis             | EPZ36881          |

|  |                                   |                                                                                                                                                                                          |
|--|-----------------------------------|------------------------------------------------------------------------------------------------------------------------------------------------------------------------------------------|
|  |                                   | XP_009493699.1                                                                                                                                                                           |
|  | Fonticula alba                    | XP_009496662.1                                                                                                                                                                           |
|  | Batrachochytrium salamandrivorans | XP_006677768.1                                                                                                                                                                           |
|  | Capsaspora owczarzaki             | XP_004349389.2                                                                                                                                                                           |
|  | Neospora caninum Liverpool        | XP_003882351.1                                                                                                                                                                           |
|  | Toxoplasma gondii                 | XP_018637326.1                                                                                                                                                                           |
|  | Hammondia hammondi                | XP_008884684.1                                                                                                                                                                           |
|  | Blastocystis hominis              | XP_012899044.1                                                                                                                                                                           |
|  |                                   | XP_008862967.1                                                                                                                                                                           |
|  |                                   | XP_008860947.1                                                                                                                                                                           |
|  |                                   | XP_008864272.1                                                                                                                                                                           |
|  | Aphanomyces invadans              | XP_008864273.1                                                                                                                                                                           |
|  |                                   | XP_008615248.1                                                                                                                                                                           |
|  |                                   | XP_008610558.1                                                                                                                                                                           |
|  | Saprolegnia diclina               | XP_008610969.1                                                                                                                                                                           |
|  |                                   | XP_002288037.1                                                                                                                                                                           |
|  | Thalassiosira pseudonana          | XP_002290889.1                                                                                                                                                                           |
|  | Phaeodactylum tricornutum         | XP_002176847.1                                                                                                                                                                           |
|  | Ectocarpus siliculosus            | CBN74004.1                                                                                                                                                                               |
|  | Aureococcus anophagefferens       | XP_009040959                                                                                                                                                                             |
|  | Nannochloropsis gaditana          | EWM27520.1                                                                                                                                                                               |
|  |                                   | aug1.9_g4262 (JGI<br>Genome portal:<br><a href="http://genome.jgi.doe.gov/pages/blast-query.jsf?db=rhizaria">http://genome.jgi.doe.gov/<br/>pages/blast-<br/>query.jsf?db=rhizaria</a> ) |
|  | Bigelowiella natans               |                                                                                                                                                                                          |
|  | Reticulomyxa filose               | ETO23872 (ENSEMBL)                                                                                                                                                                       |
|  | Entamoeba histolytica             | XP_653696.1                                                                                                                                                                              |
|  | Polysphondylium pallidum          | XP_020436456.1                                                                                                                                                                           |
|  |                                   | XP_635158.1                                                                                                                                                                              |
|  | Dictyostelium discoideum          | XP_629693.1                                                                                                                                                                              |
|  | Guillardia theta                  | XP_005841632.1                                                                                                                                                                           |
|  | Emiliana huxleyi                  | XP_005788433                                                                                                                                                                             |
|  | Chrysochromulina                  | KOO22168                                                                                                                                                                                 |

| <b>Nicastrin Proteins</b>       |                   |
|---------------------------------|-------------------|
| <b>Species</b>                  | <b>Protein ID</b> |
| Homo sapiens                    | NP_001277113.1    |
| Homo sapiens                    | NP_056146.1       |
| Pan troglodytes                 | XP_513923.2       |
| Mus musculus                    | NP_067620.3       |
| Bos taurus                      | NP_001029647.1    |
| Anolis carolinensis             | XP_008121550.1    |
| Xenopus tropicalis              | NP_001123711.2    |
| Danio rerio                     | NP_001009556.1    |
| Takifugu rubripes               | XP_003978286.1    |
| Saccoglossus kowalevskii        | NP_001161608.1    |
| Strongylocentrotus purpuratus   | XP_788243.4       |
| Hydra vulgaris                  | XP_012561598.1    |
| Drosophila melanogaster         | NP_001262932.1    |
| Amphimedon queenslandica        | XP_019855736.1    |
| Monosiga brevicollis            | XP_001748010.1    |
| Populus trichocarpa             | XP_002305230.2    |
| Dictyostelium discoideum        | XP_637065.2       |
| Chlamydomonas reinhardtii       | XP_001701591.1    |
| Capsaspora owczarzaki           | XP_004342890.1    |
| Batrachochytrium salamandrivora | OON03627.1        |
| Polysphondylium pallidum        | XP_020431244.1    |
| Dictyostelium discoideum        | XP_637065.2       |
| Batrachochytrium salamandrivora | OON03628.1        |
| Chrysochromulina                | KOO29656.1        |
| Guillardia theta                | XP_005827562.1    |
| Ectocarpus siliculosus          | CBJ31078.1        |
| Nannochloropsis gaditana        | EWM23993.1        |
| Aphanomyces invadans            | XP_008876423.1    |
| Trichomonas vaginalis           | XP_001312893.1    |
| Thalassiosira pseudonana        | XP_002290995.1    |
| Reticulomyxa filosa             | ETO25807.1        |
| Fonticula alba                  | XP_009496472.1    |
| Saprolegnia diclina             | XP_008618124.1    |

| <b>APH Proteins</b> |                                                         |                   |
|---------------------|---------------------------------------------------------|-------------------|
|                     | <b>Species</b>                                          | <b>Protein ID</b> |
|                     |                                                         |                   |
|                     | Homo sapiens                                            | NP_001071096.1    |
|                     |                                                         | NP_112591.2       |
|                     | Mus musculus                                            | NP_666246.1       |
|                     |                                                         | NP_080950.1       |
|                     |                                                         | NP_808251.1       |
|                     | Bos taurus                                              | NP_001029842.1    |
|                     |                                                         | NP_001178332.1    |
|                     | Anolis carolinensis                                     | XP_003228723.1    |
|                     |                                                         | XP_008123904.1    |
|                     | Xenopus tropicalis                                      | NP_001015843.1    |
|                     |                                                         |                   |
|                     | Pan troglodytes                                         | XP_009428545.1    |
|                     | Takifugu rubripes                                       | XP_003969662.1    |
|                     |                                                         | XP_003969662.1    |
|                     | Danio rerio                                             | NP_956409.1       |
|                     |                                                         | NP_001025300.1    |
|                     | Lethenteron japonicum<br>(Japanese Lamprey<br>genome) ( | JL4297            |
|                     |                                                         | JL380             |
|                     |                                                         | JL381             |
|                     | Latimeria chalumnae                                     | XP_014349599.1    |
|                     | Callorhynchus milii                                     | XP_007910223.1    |
|                     | Branchiostoma floridae                                  | XP_002607668.1    |
|                     | Saccoglossus kowalevskii                                | XP_002736656.1    |
|                     | Strongylocentrotus purpurus                             | XP_783542.1       |
|                     | Caenorhabditis elegans                                  | NP_492469.1       |
|                     | Drosophila melanogaster                                 | NP_608710.1       |
|                     | Hydra vulgaris                                          | XP_002167184.1    |
|                     | Amphimedon queenslandica                                | XP_003382482.1    |
|                     | Dictyostelium discoideum                                | XP_647460.1       |
|                     | Chlamydomonas reinhardtii                               | XP_001693775.1    |
|                     | Capsaspora owczarzaki                                   | XP_004365170.1    |
|                     | Aphanomyces invadans                                    | XP_008879360.1    |
|                     | Fonticula alba                                          | XP_009492849.1    |
|                     | Batrachochytrium salamancense                           | OON06716.1        |
|                     | Ectocarpus siliculosus                                  | CBN76993.1        |
|                     | Guillardia theta                                        | XP_005832892.1    |
|                     | Phaeodactylum tricorutum                                | XP_002181033.1    |
|                     | Polysphondylium pallidum                                | XP_020437801.1    |
|                     | Rozella allomyces                                       | EPZ35700.1        |
|                     | Entamoeba histolytica                                   | EMS12153.1        |
|                     | Emiliania huxleyi                                       | XP_005772054.1    |

## Supplementary file 1

## PEN-2 Proteins

| Species                       | Protein ID     |
|-------------------------------|----------------|
| Homo sapiens                  | NP_758844.1    |
| Mus musculus                  | NP_079774.1    |
| Bos taurus                    | NP_001008669.1 |
| Anolis carolinensis           | XP_003225015.1 |
| Danio rerio                   | NP_991139.1    |
| Takifugu rubripes             | XP_003966057.1 |
| Xenopus tropicalis            | NP_001016336.1 |
| Drosophila melanogaster       | NP_788401.2    |
| Branchiostoma floridae        | XP_002610690.1 |
| Strongyloides stercorarius    | XP_791533.1    |
| Saccoglossus kowalevskii      | XP_791533.1    |
| Hydra vulgaris                | XP_002166668.1 |
| Amphimedon queenslandica      | XP_011407614.1 |
| Popillia strigocarpa          | XP_002306247.2 |
| Dictyostelium discoideum      | XP_629118.1    |
| Chlamydomonas reinhardtii     | XP_001700868.1 |
| Capsaspora owczarzaki         | XP_004364102.2 |
| Batrachochytrium salamancense | OON04588.1     |
| Polysphondylium pallidum      | XP_020434406.1 |
| Aureococcus anophagefferens   | XP_009038719.1 |
| Saprolegnia diclina           | XP_008614431.1 |
| Aphanomyces invadans          | XP_008879623.1 |
| Chrysochromulina              | KOO31300.1     |
| Entamoeba histolytica         | GAT91830.1     |
| Hammondia hammondi            | XP_008886995.1 |
| Toxoplasma gondii FOU         | KFG49711.1     |
| Toxoplasma gondii GAB2        | KFG34828.1     |
| Toxoplasma gondii ME49        | XP_018638436.1 |
| Toxoplasma gondii ARI         | KYF41243.1     |
| Toxoplasma gondii RUB         | KFG60490.1     |
| Toxoplasma gondii p89         | KFG29220.1     |
| Toxoplasma gondii GT1         | EPR57907.1     |
| Fonticula alba                | XP_009496614.1 |
| Toxoplasma gondii VA          | KFH05526.1     |
| Toxoplasma gondii VE          | ESS29517.1     |
| Toxoplasma gondii VE          | CEL71754.1     |
| Neosporacanium lividum        | XP_003879933.1 |

## Supplementary File 2

### Protein Sequences

>NP\_000012.1 presenilin-1 isoform I-467 [Homo sapiens]  
MTELPAPLSYFQNAQMSQEDNHLNNTVRSQNDNRERQEHNDRRSLGHPEPLSNGRPQGNRSRQVVEQDEEED  
EELTLKYGAKHVIMLFVPVTLTLCMVVVVATIKSVSFYTRKDGQLIYTPFTEDTETVQGRALHSILNAAIMI  
SVIVVMTILLVVLYKYRCYKVIHAWLIISLLELFFFSFIYLGVEVFKTYNVAVDYITVALLIWNFGVVG  
ISIHWKGPLRLQQAYLIMISALMALVFIKYLPEWTAWLILAVISVYDLVAVLCPKGPLRMLVETAQERNE  
TLFPALIYSSTMVWLVNMAEGDPEAQRVSKNSKYNNAESTERESQDTVAENDDGGFSEWEAQDRDLSLGP  
HRSTPESRAAVQELSSSILAGEDPEERGVKLGDFIFYSVLVGKASATASGDWNTTIACFVAILIGLCL  
TLLLLLAIFKKALPALPISITFGLVIFYFATDYLVPFMDQLAFHQFYI

>XP\_016781825.1 PREDICTED: presenilin-1 isoform X1 [Pan troglodytes]  
MTTTRVRLGRGLQAAAGSAVSHRQNSGWSGRNLSYEPRRQRGGGEAYNDNRERQEHNDRRSLGHPEPL  
SNGRPQGNRSRQVVEQDEEEDDEELTLKYGAKHVIMLFVPVTLTLCMVVVVATIKSVSFYTRKDGQLIYTPFTE  
DETETVQGRALHSILNAAIMISVIVVMTILLVVLYKYRCYKVIHAWLIISLLELFFFSFIYLGVEVFKTYN  
VAVDYITVALLIWNFGVVGMSIHWKGPLRLQQAYLIMISALMALVFIKYLPEWTAWLILAVISVYDLVA  
VLCPKGPLRMLVETAQERNETLFPALIYSSTMVWLVNMAEGDPEAQRVSKNSKYNNAESTERESQDTVAE  
NDDGGFSEWEAQDRDLSLGPHRSTPESRAAVQELSSSILAGEDPEERGVKLGDFIFYSVLVGKASATA  
SGDWNTTIACFVAILIGLCLTLLLLLAIFKKALPALPISITFGLVIFYFATDYLVPFMDQLAFHQFYI

>NP\_032969.1 presenilin-1 [Mus musculus]  
MTEIPAPLSYFQNAQMSQEDSHSSSAIRSQNDSQERQQQHDRQRLDNPEPISNGRPQSNRSRQVVEQDEEED  
EELTLKYGAKHVIMLFVPVTLTLCMVVVVATIKSVSFYTRKDGQLIYTPFTEDTETVQGRALHSILNAAIMI  
SVIVIMTILLVVLYKYRCYKVIHAWLIISLLELFFFSFIYLGVEVFKTYNVAVDYVTVALLIWNFGVVG  
IAIHWKGPLRLQQAYLIMISALMALVFIKYLPEWTAWLILAVISVYDLVAVLCPKGPLRMLVETAQERNE  
TLFPALIYSSTMVWLVNMAEGDPEAQRVSKNSKYNNAESTERESQDTVAE  
HRSTPESRAAVQELSSSILAGEDPEERGVKLGDFIFYSVLVGKASATASGDWNTTIACFVAILIGLCL  
TLLLLLAIFKKALPALPISITFGLVIFYFATDYLVPFMDQLAFHQFYI

>NP\_777146.1 presenilin-1 [Bostaurus]  
MTELPAPLSYFQNAQMSQEDNHLNNTVRSQNDNRERHEHGNERRRRGNTESVSNRAPSSSQVVEQDEEED  
DEELTLKYGAKHVIMLFVPVTLTLCMVVVVATIKSVSFYTRKDGQLIYTPFTEDTETVAQGRALHSILNAVIM  
ISVIVIMTILLVVLYKYRCYKVIHAWLIVSSLELFFFSFIYLGVEVFKTYNVAMDYISVALLIWNFGVVG  
MIAIHWKGPLRLQQAYLIMISALMALVFIKYLPEWTAWLILAVISVYDLVAVLCPKGPLRMLVETAQERN  
ETLFPALIYSSTMVWLVNMAEGDPEAQRKVSNSKYNNAQRANSPTTTGTESESQDPVTESDDGGFSEE  
WEAQDRSRLGPHHSTAESRSVQDLSSSILASEDPEERGVKLGDFIFYSVLVGKASATASGDWNTTIA  
CFVAILIGLCLTLLLLLAIFKKALPALPVSITFGLIFYFATDYLVPFMDQLAFHQFYI

>XP\_008102150.1 PREDICTED: presenilin-1 isoform X1 [Anolis carolinensis]  
MAELSAHLSQVQRGQLKETSPDNHLTNTNDNIERRRQEGSSQRRTDNPDAASNGQPQNSTRQVVEQDDDD  
EEELTLKYGAKHVIMLFVPVTLTLCMVVVVATIKSVSFYTRKDGQLIYTPFTEDTETVQGRALNSVLNAAIM  
ISVIVVMTILLVVLYKYRCYKVIHAWLIVSSLELFFFSFIYLGVEVFKTYNVAMDYITVALMIWNFGVVG  
MICIHWKGPLRLQQAYLIMISALMALVFIKYLPEWTAWLILAVISVYDLIAVLCPKGPLRMLVETAQERN  
ETLFPALIYSSTMVWLVNMAEEDPEAQRKAPKSSSTYDKQVTANQNQAGAETDDGGFSQEWQQRDNRIG  
PLESTPETRAVVQAMPADSVGSEDPDERGVKLGDFIFYSVLVGKASATASGDWNTTLACFVAILIGLCL  
LTTTTLAIFKKALPALPISITFGLVIFYFATDNLVQPFMDQLAYHQFYI

>NP\_001027027.1 presenilin-1 [Xenopus tropicalis]  
MNDTNERRSNEHSESQNGTQSSSQVLEQDEEEDDEELTLKYGAKHVIMLFVPVTLTLCMVVVVATIKSVS  
FYTRYDGQLIYTPFTEDTDSVQGRALNSILNTAIMISVIVVMTILLVVLYKYRCYKVIHAWLIISSLEL  
FFFSYIYLGVEVFKTYNVAMDYITLALMIWNFGVVGMICIHWKGPLRLQQAYLIMISALMALVFIKYLPEW  
TTWLILAVISVYDLIAVLSPKGPLRMLVETAQERNETLFPALIYSSTMVWLVKMDGDPGFKQSASKKTY  
NAQAPVAQPRSDAASDDNGGFDTAWEQQRNEQIQINSTPESRAAVQALPSNPPSEDPEERGVKLG  
DFIFYSVLVGKASATASGDWNTTLACFVAILIGLCLTLLLLLAIFKKALPALPISITFGLVIFYFATDYL  
VQPFMDQLAFHQFYI

>NP\_571099.1 presenilin-1 [Danio rerio]  
MADLVQNAANNVLDNGMDTSRHTSSTAAPPSRNEVELNGQPPTAPPPQVVTDSEEEDEEELTLKYGAKHV  
IMLFIPVTLICMVVVVATIKSVSFYTKDGGQLIYTPFREDTETVQQRALHSMNLAIIMISVIVVMTLVLV  
VLYKYRCYKVIQAWLFFSNLLLLLFFFSLIYLGEVFKTYNVAMDYFTLALI IWNFGVVGMICIHWKGPLRL  
QQAYLIMISALMALVFIKYLPEWTAWLILAAISVYDLLAVLCPKGPLRILVETAQERNEAIFPALIYSST  
MVWLFNMADSAETRNNSSHVPVQQENQVVMAPTAQAEDDGGFTPAWVDHQHQLGPMQSTEESSRRQIQE  
MPSARPPPPADDDEERGKVLGLGDFIFYSMLVGKASATASGDWNTTLACFVAILIGLCLTLLLLLAI FKKK  
LPALPISITFGLVFFYFATDNLVRFPMQDLAVHQFYI

>XP\_003978532.1 PREDICTED: presenilin-1 [Takifugurubripes]  
MANNAEDIENNMNQEPSVNVHEPAVQPQEVSVTRSRSRGGGGHGGGPEQNGQPPATHAAHVETEDED  
EELTLKYGAKHVIMLFVPTLICMVVVVATIKSVTYTQNDGQRLIYTPFPEDTDTVAQRALNSILNATIM  
ITV I IIMTLVLVLYKYRCYKVIQGWLFSLLLLLLFFFSYIYLQEVFKTYNLAMDYFTVA I I IWNFGVVG  
MMC IHWKGPLRLQQAYLIMISALMALVFIKYLPEWTAWLILAVISVYDLLAVLCPKGPLRILVETAQERN  
EPIF PALIYSSTMVWLVNMDATDRPKRSSTDAAPPQOETQEAVASPTPSSLSQDDGGFTPSWVSQQEHQL  
GTLQSTEQSRQEIQEMPSARPAEEDDEERGKVLGLGDFIFYSMLVGKASATASGDWNTTLACFVAILIG  
LCLTLLLLLAI FKKKALPALPISIFFGLVFFYFATDNLVQPFMDKLALHQFYI

>XP\_007891435.1 PREDICTED: presenilin-1 isoform X1 [Callorhinchusmilii]  
MSGLSAQAVPVFQGGQLGESPSEIHQNSLGWFKMDSADENEENVPLLIVREDVSEEDVRHNQNDVNRIAA  
DDGVPVSNQGSENTRPIREQTDDGDEEELTLKYGAKHVIMLFVPTLICMVVVVATIKSVTFYTQNDGQL  
LYTPFTEDTDTVQRAVNSILNAMIMISVIIVMTLLLVLLYKYRCYKVIHGWLIISSLLLLLFFFSFIYLG  
EVFKTYNVAMDYFTLALVIWNFGVVGMICIHWKGPLRLQQAYLIMISALMALVFIKYLPEWTAWLILAVI  
SVYDLVAVLCPKGPLRILVETAQERNEPIF PALIYSSTMVWLVGMADQEARASSPADEHLTSANISLNNT  
CVDETAEGPTNAGETNTDDGGFDTRWRCNRDETLGNVESTPEASRAVVQAMPSPPTLDDDPEERGVKLG  
DFIFYSVLVGKASAAASGDWNTTLACFVAILIGLCLTLLLLLAI FKKKALPALPISITFGLVFFYFATDNLV  
RFMDQLAFHQFYI

>XP\_006000568.2 PREDICTED: presenilin-1 [Latimeriachalumnae]  
MTELSASLPVYQQQLTEDFPDSRQTNSNESGERRPNESRNAESNGEPQAASQRVVVSDEEEDDEELTLKY  
GAKHVIMLFVPTLICMVVVVATIKSVSFYTKKNGQLIYTPFSED TDTVQQRALNSILNAAIMISVIIVMT  
LLLVLLYKRCYKVIHGWLIISSLLLLLFFFSFIYLGGEVFKTYNVAMDYITVALI IWNFGVVGMICIHWK  
PLRLQQAYLIMISALMALVFIKYLPEWTGWLILVVISVYDLIAVLCPKGPLRMLVETAQERNEPIF PALI  
YSSTMVWLVGMADPDPPEARKEPEDSRREAEASTNHTASATPADDGGFTQDWVQQNETLGMHSTMETR  
AAVQALPNNNPIPEDPEESTYSFALGLLSYLMGGLCLTLLLLLAI FKKKALPALPISITFGIIF YFATDNLV  
RPFMDQLAFHQFYI

>JL2681 len=427 1-427- Presenilin [Lethenteronjaponicum]  
MCCVACVQPQVTTTTTRQGERREDGDGSGRERSHSEPHTDEESEEEELSLKYGAKHVIM  
LFVPTLCLMLVVVATIKSVTFYTEKNGQLIYTPFTEDTDTVQQRVLSILNTIILISVIV  
VLTIFLVLLYKYRCYKFIHGWLIMSSMLLFLFTYLYLGEVFKTYNVAMDYPTLILIMWN  
FGVVGMICIHWKGPLLLQQAYLIMISALMALVFIKYLPEWSAWVILGAISIYDLIAVLSP  
KGPLRMLVETAQERNEPIF PALIYSSTMVWVMGMADTNSTEQQSTRPSPEPNNDAQGDPQ  
PSEPDPVPRTTHEARELARERARANPPMPPEESEEEERGKIKLGLGDFIFYSVLVGKASAAA  
SGDWNTTLACFVAILIGLCLTLLLLLAI FKKKALPALPISITFGLIF YFATDNLVRFMDSL  
AFHQYYI

>XP\_002738746.1 PREDICTED: presenilin-1-like [Saccoglossuskowalevskii]  
MSLSNEEEEDCSERSQLMETVPNVRYSGTGGSVNFSDDPDTEDGGIRTHMYGGFDRTRPTGVREQNVESD  
SDEACNRRIQQESSTRRTVQQHDEDEEELTLKYGAKHVIMLFAPVSLCMLVVVATVAVTFYTDSSGGA  
YLIYTPFHEDKGGAGTKAWNAFANAAIMIGVILVMTIFLVILYKRCYKFIHGWLIVSSMLLFLFTYIY  
LQELLSTYNVPMYITLTIFMWNFGVVGMMCIHWKGPLHLQQAYLIIISALMALVFIKYLPEWTTWVILG  
AISYIDLAVLCPRGPLRVLVETAQERNEPIF PALIYSSTMVWLVGMADNNPEQRPKRKKKSNKKTELE  
QPIREPGRHDDALNEDLDEGGFTDWSNRQPIQTPTDPTQSVESVDARAAASALRRSASNERPRDTTAT  
LDLEEEERGVKLGDFIFYSVLVGKASSYGDWNTTLACFVAILIGLCLTLLLLLAI FKKKALPALPISIT  
FGLIF YFTTRYLVSPFTDTLASQQVYI

>XP\_001178715.1 PREDICTED: presenilin-1 isoform X2  
[Strongylocentrotuspurpuratus]  
MGVWDQDEDNSTENTRLMLDTEEEEQAPTETMSAEILAPTS DGASNARRPIQVEGSNNPSYGT SVNAEVR  
GTSVQRRANAGR PANQERRRERDPPMEEEEEDEMLKYGAKHVIMLFVPSVLCMLV VVATI STVSFYTE  
SGDVYLIYTPFHEKSDQAGTKAWNALANALIIIGIVLIMTIFLVVLYKYRCYKVIHGWLVLSSLLLLFFF  
TFFYLQELLV TYNIPMDYFTI AVIMWNFGMVMVSIHWKGPLRLQQLYLIVISALMALIFIKYLP EWTLW  
TILAAIAVYDLFAVLC PKGPLRMLVETAQERDEQIFPALIYSSTMVWLVGMADIDSPPPKSKAKQEP PVE  
EHTAEENATGGQEDQTVSSDQEVNNGGFDTVFTERRERDLERSANSSVTS EDRRAAVRALRQNNGPSNRQP  
PVDEEEEEEERGVKLG LDFIFYSVLVGKASASGDWTTT IACFVAILIGLCLTLILLAI FKKALPALPISI  
AFGLVVFYFCTSNLVFPFTDELASQQVYI

>NP\_508175.1 Presenilin sel-12 [Caenorhabditiselegans]  
MPSTRRQEGGGADAETHTVYGTNLITNRNSQEDENVVEEAELKYGASHVIHLFVPSVLCMALV VFTMNT  
ITFYSQNNGRHLLYTPFVRETDSIVEKGLMSLGNALVMLCVVVLMTVLLIVFYKYKFKYKLIHGWLIVSS F  
LLLFLFTTIYVQEV LKSFVSPSALLVLFGLGNYGVLGMMCIHWKGPLRLQQFY LITMSALMALVFIKYL  
PEWTVVFLV FVISVWDLVAVLTPKGPLRYLVETAQERNEPIFPAL IYSSGVIYPYVLVTAVENTTDPREP  
TSSDSNTSTAFPGEASC SSETPKRPKVKRI PQKVQIESNTTASTTQNSGVRVERELAAERPTVQ DANFHR  
HEEEERGVKLG LDFIFYSVLLGKASSYFDWNTT IACYVAILIGLCLTLVLLAVFKRALPALPISIF SGL  
IFYFCTRWIITPFV TQVSQKCLLY

>NP\_491328.1 Presenilin hop-1 [Caenorhabditiselegans]  
MPRTKRVYSGKTI TGVLYPVAICMLFVAINVKLSQPEQQEQSKVVYGLFHSYDTADSGTITLYLIGFLIL  
TTS LGVFCYQMKFYKAIKVYVLANSIGILLVYSVFHFQRIAEAQ SIPVSVPTFFFLILQFGGLGITCLHW  
KSHRRLHQFY LIMLAGLTAIFILN ILPDWTVMMALTAISFWDIVAVLTPCGPLKMLVETANRRGDDK FPA  
ILYNSSSYVNEVDSPD TTRSNTPLTEFNSSSSRLLSDESLLRPPV IPRQIREVREVEGTIRLGMGDFV  
FYSMLGN TVQTCPLPTV VACFVSNLVGLTITLPIVTL SQTALPALPFPLAIAAIFYFSSHIALTPFTDL  
CTS QLILI

>NP\_492095.1 Presenilin spe-4 [Caenorhabditiselegans]  
MDTLRSISSELVRSSQLRWT LFSVIANMSLTL SIWIGVYNMEVNSEL SKTYFLDPSFEQT TGNLLLDGFI  
NGVGTILVLGCVS FIMLAFVLFDFR RIVKAWLTL SCLLILFGVSAQTLHDMFSQVFDQDDNNQYYMTIVL  
IVVPTV VYFGGIYAFFSNSSLILHQIFVVTNCSLISV FYLRVFPKTTWFV LWIVLFWDLFAVLAPMGP  
LKKVQEKASDYSKCVLNLIMFSANEKRLTAGSNQEETNEGEESTIRRTVKQTIEYYTKREAQDDEFYQKI  
RQRRAAINPDSVPTEHSPLVEAEP SPIELKEKNSTEELSDDES DTSETSSGSSNLSSSDSSTTVSTSDIS  
TAEEDQKEWDDLVSNSL PNNDKRPATAADALNDGEVLR LFGDFV FYSLLIGQAAASGCPFAVISAALG  
ILFGLVVT LTVFSTEESTTPALPLPVICGTF CYFSSMFFWEQLYG

>XP\_012561939.1 PREDICTED: presenilin-1-like [Hydra vulgaris]  
MPHNDEVERVISNQERNVSRFNLLARFRNVRTNNEGRSTVQPPQPLEQRSMNVVESEDDDHEEMLQYGAK  
SVLMLIIPVSI CLLVVVATISSV TYYTQ NAGTYLVYTPFHEEGNISHAEKFGQALANSLIVIGVILVMTI  
ILVILYKCR CYRIIEAWLILSSLM LFFFSTIYLQELLRVYNVAMDYITV VLLIWNFGVVMIC IHWKGP  
LLLQQAYLIIISALMALVFIKYL PDWTLWFILAAVSIYDLFAVLC PKGPLRILVQTAQERNEQLFPSLIY  
SSTFMYPTVVNQVQ EATSSQAKLTENTDDNHEDEPNNIQQQTAPILNEQNVEATATTPPTQSEGPEERGV  
KLG LDFIFYSVLVGKASSYKDWNTT LACFVAILIGLCLTL LLLLA IYRKALPALPISITFGLIFNFATSY  
FVKPFTDHLAGEQAFI

>XP\_002597164.1 hypothetical protein BRAFLDRAFT\_118108  
[Branchiostomafloridae]  
MSQYNSGSDSEHCNERTSLMEVQVDVRSVGEAVTTQRVSRSSGRRSQIQENVPDGADRREAGDGGEDH  
GIRHREDEEEEDTEMTLKYGAKHVIMLFAPVSLCMAVVVATISSITFYTEKNGYLIYTPFHEEGASTASK  
VGDSL ANAAIMVGVILVMTVFLVILYKYRCYKFIHGWLILSSLM LFLFAYIYLGEVLQAYNIPCDYITL  
AIVMWNFGAVGMVCIHWKGPLLLQQAYLIVISALMALVFIKYL PDWTTWFILGAI SLYDLVAVLCPKGPL  
KVLVETAQERNEPIFPAL IYSSTMWVFGMADSDPEAKKKKKKKRRGDGDAQGAAPAGAVGGE EGGF  
GQDWNESRGFQPTRRPNRGGNASDASVNSE DARQAAQNLSNGRLSPSGNQQQQQQQQME EDEDEEERGV



KLGLGDFIFYSVLVKGASSNGDWNNTLACFVAILIGLCLTLLLLLAIFFKKALPALPISITFGLIFNFATAN  
LVTPTDALASQQVYV

>NP\_524184.1 presenilin, isoform A [*Drosophila melanogaster*]  
MAAVNLQASCSSGLASEDDANVGSQIGAAERLERPPRRQQQRNNYSSNQDQPDAAAILAVPNVVMREPCG  
SRPSRLTGGGGGSGGPPTNEMEEEEQGLKYGAQHVIKLFVPSVLCMLVAVVATINSISFYNSTDVYLLYTPF  
HEQSPEPSVKFWSALANSLILMSVVVVMTFLLIVLYKKRCYRIIHGWLILSSFMLLFIFTYLYLEELLRA  
YNIPMDYPTALLIMWNFGVVGMMSIHWQGPLRLQQGYLIFVAALMALVFIKYLPEWTAWAVLAAISIWDL  
IAVLSPRGPLRILVETAQERNEQIFPALIYSSTVVYALVNTVTPQQSQATASSSPSSSNSTTTTTRATQNS  
LASPEAAAASGQRTGNSHPRQNQRDDGSLATEGMPLVTFKSNLRGNAEAGFTQEWSANLSERVARRQI  
EVQSTQSGNAQRSNEYRVTAPDQNHDPDQGEERGKGLGLGDFIFYSVLVKGASSYGDWTTTIIACFVAILI  
GLCLTLLLLLAIWRKALPALPISITFGLIFCFATSAVVKKPFMEDLSAKQVFI

>XP\_001750030.1 hypothetical protein [*Monosigabrevicollis* MX1]  
MMMMNCLSLSLSLSSLSLSLSLSIHSLSLSLLLLSTLLFTSLFSNQFISLSSLSLSSLCFLTGVVNTMIR  
NENKRILHTQREEREREREKRQRWLASLSLSLSLSLSHSESALLRRDRSIMAGDGSEAPEVASTNSGDPLI  
EHDRRTTQDDGRRATRPLDANVHERLLSAGRENSVNYTAEEREARIRARQEEAARRELELDLKYDAESVL  
ALIKPVSACMIVVIATIRSITYFSQNDTQFAYTPFESNGGAGESSGERFSGGAVLNALIVVGIVIVMTFIL  
VMLYIYEYKYIYGWLALSALLLYFFSYQYIECVMTTRRQVLIHNASIDWITMAFI IWNFGTVGFIAI  
FWRSPHAVQQVYLVIVSALMALVLIKLPDWTTWVLLAAIAIYDLFAVLSPCGPLKCLVEVAQERNQPLF  
PSLIYSSTMMWTVTMADVGDSSSNATIESQPRVADGGASTRGTEMTSMSSQPRARQGSRADSEADDGAR  
DISTFAAPRGETRSTNQAAPASQPSFQPDDEDDSGVKLGLGDFIFYSVLVKGAAATAHEWTTILACYVAIL  
IGLACTLLLLSIFKKALPALPISIFFGLCFFFLTSEVLDPIDRLNERQIFL

>XP\_019849527.1 PREDICTED: presenilin-1-like isoform X1  
[*Amphimedon queenslandica*]  
MSTNSETASLLSGEARETEYGSNDDEGMEEQEEDGITVSPPLQGTREEEEEETEQKDDEQSCGMKYVFKKI  
LNVLPSPFGDDGDDPTSEANEEALRFGAQQMILLIFPVFICMALVVAIQLSVEKNVTSSGTLIYTPFDEDT  
ASNDGFVLLFALANVAIVITLVVVMITILVCLYKYRCYKIIYGWLVVASALLLFVFSFFFVEVLQVHYL  
FIDWPSFLVLIWNFGMGVLIHWKGPLRLQQAYLIFCSALTANIFVKYLPNWTAWILLAAISLYDLIAV  
LCPKGPLRVLVETARERNETIFPSLIYSTTMVWLVGMADRPTNKKKDKKNTDDTSGSSDGSHEEEEEEEEG  
GGEREGRRDNDGDDDDTDGIEMRSIRAAADTNRRRRRERQQQQQQEEEEEEEEQEERQGFKLGLGDFIFY  
SILVGAHSDSTGDWVVISSCFVAILIGLCMTIIILGIVRRALPALPISIFCGLIFYFSSQYVIAPFAQV  
LATTQTFI

>XP\_635158.1 presenilin family protein [*Dictyostelium discoideum* AX4]  
MKENEDEINKTDEKYKIKNPSNNGNKNKNNNNNNNNNNNNNNNNNNNNNNNNNNNNNNNGNSNLENIEGLN  
KYNIIKKGKKNESNTSLNNIYISSPNLSERSDNSIGSYCTNKTMSSENSIINIETLFRDSVSEQNSDEC  
GSKVDKDLDEDDDDDDDETEVPELVYSEMIVSILYPCITMIVVLAIRAISSSTSKNSQIVEISNDNS  
GGNGDSSSGADKMVFDVSVNSLIFLAVIILSTTIMVVLYKFKLMKALYAWLMGTSILLLGVFGGFLFLIL  
LAYLNLGLDYVTFVIVVWNFSVGGIVCIFYWSPKLLNQGYLISISVLMALFFSRLPDWTTWGILSIVSIY  
DIFAVLCPGGPLRILIETAQKRNIENIPAMIYNASIYIGMIYNEDNLENNNNNNNNNNIELNINEVDIENN  
NNNEDENKNTEDGNNNNNNKNNNNNNNNNRIENENGAENSSENGSIPTPPTIPNFIKDEKEINRSSGSN  
GFPNFKKANDNILIGDAETNDEIVSNAESSIDSTISESYVKPKQSIRLGLGDFVVFYSVLIGKAASYQIT  
TVFTVFIAIITGLFLTLILLAVFRRALPALPMSIIFGIIVFFLTFKILIQYIYFLGENQIFV

>XP\_629693.1 presenilin family protein [*Dictyostelium discoideum* AX4]  
MSSDNNNDPFDLNEGDHDFNRVSTTTSPNRQSINSSPKQSSPKSTNNNDKNNIILDLNNDNNNDNNNTN  
NYNDEDIDVDNKNKFENKDNNTYNSNGGSNNKNNKKNKKNSSNSDNEEADENTSLISDSEPLLKKEKD  
DEQIEIENLDGEDYDDEVSLQDFSSMIVSIIIPVSIITMAVVFVKYLNNTLYASTLSYTIAGSSGGG  
SGADSIITGNSFVDSLIVAGIVLGMIIVTTVAVFLLYKYRCLKILYGLVFLSVGMMLGSFGTTFQAMLSA  
ANLPLDYITFAFLIFNFTVCGIIGVFWYAHQYVNLVLIISVLMALSLTRLPQWTIFTLLVIVAIYDLF  
AVLCPRGPLKVLVELSQERNENIPALVYETGKGSNSLKLGLGDFIFYSLISRAALVHMSCVFSTFIAI  
LTGLFLTLCLAIFFKKALPALPISIFLGILFYYSNNFLTPFIEALTLISQIFV

>XP\_001701664.1 presenilin protease [*Chlamydomonas reinhardtii*]  
MRDCSSIIVLPNAVNAAGNLCAFAWFCQPVVVRVPASAMATPSLLDDLGEVTVGIVAPVSLCMAVTVLLV

RLLNPEGVSSSNTVLIASIAIYQEASDSSGKKFGGALLNALIFVAVVAGMTVVLFLLFKYKCYKFIFAYM  
GFAVFNIFFFITGALFIQVMQVIDLHIDAFSLAYGLFNFSIVGTLGLLFMPIPLLSKQVYLIWVGIIIVAY  
IFTFIPEWTAWVILCFMALLYDIVAVLVPGGPKALVELAIERQQELPALIYEAPAGGRPYVRGWGNRGQ  
RGEGEEGGPEGPAGPDGPGGPAANGAVPAAPPNVVPSPHANGRGPRVPAEASSPAASLEMRQPTTRASCG  
ARAAAPAQGRGRSRRGGSRASGSRCRHPRTLAPRAPAAAAALATAAPGRRGARCAACSRAAPARRQARG  
RWTHTCAAPVAAAARNTLDGELPASEPPPQLAGAPPPDGHHPHHRGHGHHDGGADGGGGGGDLPLDLPD  
SIKLGGLGDFIFYSMLVGRAAMYDFMTVFAAYLAI IAGLGLTLLCLAVFQKALPALPFSIALGVAFYFLTR  
LTLEPFLIPLATNLAFF

>EMT04448.1 Presenilin-like protein [Aegilopstauschii]  
MAVYDLGAVLIPGGPLRVLLELAIERNEEIPALVYEARPVDPRHGQNWRLWRERARQPGGDLDPSSTVEV  
IGEVLGRNPLLSNAGNSPNSTTQAGEQTNLTGAVSNSRLRESPVLDLSSGSANAQAREALALPETRLHIA  
ELRVPLIQPPDRTSDDDDDDDEDGIGLSSGAIKLGDFIFYSVLVGRAAMYDYMTVYACYLAI IAG  
LGITLLLLLAFYRKALPALPVSITLGVLFYVLRITLLESFVMQCSTNFLMF

>XP\_012562740.1 PREDICTED: presenilin-1-like [Hydra vulgaris]  
MTKSKELYQIKKEMYRFYLLARFRNVRTNNEGRSTVQPPQPLEQRSMNVVESEDDDDHEEMLQYGAHSVLM  
LIIPVSIKLLVAVATISSVYTYTQAGTYLVYTPFHEEGNISHAEKFGQALANSLIVIGVILVMTIILVI  
LYKRCRYRVFSYMFVSYSRLGQKGVRFHGF I

>NP\_000438.2 presenilin-2 isoform 1 [Homo sapiens]  
MLTFMADSEEEVCDERTSLMSAESPTPRSCQEGRQGPEDGENTAQRWSQENEEEDGEEDPDRYVCSGVPG  
RPPGLEEEELTLKYGAKHVIMLFVPVTLICMIVVVATIKSVRFYTEKNGQLIYTPFTEDTPSVGQRLLSVL  
NTLIMISVIVVMTIFLVVLYKYRCYKFIHGWLIMSSMLLFLFTYIYLGEVLKTYNVAMDYPTLLLLTVWN  
FGAVGMVCIHWKGPLVLQQAYLIMISALMALVFIKYLPEWSAWVILGAI SVYDLVAVLCPKGPLRMLVET  
AQERNEPIFPALIYSSAMVWTVGMAKLDPSSQALQLPYDPEMEEDSYDSFGEPSYPEVFEPLTGYPGE  
ELEEEEEEERGVKLGDFIFYSVLVVGKAAATGSGDWNTTLACFVAILIGLCLTLLLLLAVFKKALPALPISI  
TFGLIFYFSTDNLVRPFMDTLASHQLYI

>XP\_001142009.2 PREDICTED: presenilin-2 isoform X1 [Pan troglodytes]  
MLTFMADSEEEVCDERTSLMSAESPTPRSCQEGRQGPEDGENTAQRWSQENEEEDGEEDPDRYVCSGVPG  
RPPGLEEEELTLKYGAKHVIMLFVPVTLICMIVVVATIKSVRFYTEKNGQLIYTPFTEDTASVGQRLLSVL  
NTLIMISVIVVMTIFLVVLYKYRCYKFIHGWLIMSSMLLFLFTYIYLGEVLKTYNVAMDYPTLLLLTVWN  
FGAVGMVCIHWKGPLVLQQAYLIMISALMALVFIKYLPEWSAWVILGAI SVYDLVAVLCPKGPLRMLVET  
AQERNEPIFPALIYSSAMVWTVGMAKLDPSSQALQLPYDPEMEEDSYDSFGEPSYPEVFEPLTGYPGE  
ELEEEEEEERGVKLGDFIFYSVLVVGKAAATGSGDWNTTLACFVAILIGLCLTLLLLLAVFKKALPALPISI  
TFGLIFYFSTDNLVRPFMDTLASHQLYI

>NP\_776865.2 presenilin-2 [Bostaurus]  
MLTFMADSEEEVCDERTSLMSAESPTPRSCQDGRQLEDGESAAQRWSQESEEDHEEEDPDRYVCSGVP  
GRPPGLEEEELTLKYGAKHVIMLFVPVTLICMIVVVATIKSVRFYTEKNGQLIYTPFSEDTPSVGQRLLSV  
LNTLIMISVIVTMTIFLVVLYKYRCYKFIHGWLIMSSMLLFLFTYIYLGEVLKTYNVAMDYPTLFLTVW  
NFGAVGMVCIHWKGPLVLQQAYLIMISALMALVFIKYLPEWSAWVILGAI SVYDLVAVLCPKGPLRMLVE  
TAQERNEPIFPALIYSSAMVWTVGMAKLDPSSQALQLPYDPEMEEDSYDSFGEPSYPDVFEPLPGYPG  
EELEEEEEEERGVKLGDFIFYSVLVVGKAAATGSGDWNTTLACFVAILIGLCLTLLLLLAVFKKALPALPISI  
ITFGLIFYFSTDNLVRPFMDTLASHQLYI

>NP\_035313.2 presenilin-2 [Mus musculus]  
MLAFMADSEEEVCDERTSLMSAESPTSRSCQEGRQGPEDGESTAQWRTQESEEDCEEDPDRYACSGAPG  
RPSGLEEEELTLKYGAKHVIMLFVPVTLICMIVVVATIKSVRFYTEKNGQLIYTPFTEDTPSVGQRLLSVL  
NTLIMISVIVVMTIFLVVLYKYRCYKFIHGWLIMSSMLLFLFTYIYLGEVLKTYNVAMDYPTLFLAVWN  
FGAVGMVCIHWKGPLVLQQAYLIVISALMALVFIKYLPEWSAWVILGAI SVYDLVAVLCPKGPLRMLVET  
AQERNEPIFPALIYSSAMVWTVGMAKLDPSSQALQLPYDPEMEEDSYDSFGEPSYPEAFEAPLPGYPG  
ELEEEEEEERGVKLGDFIFYSVLVVGKAAATGNGDWNTTLACFIAAILIGLCLTLLLLLAVFKKALPALPISI  
TFGLIFYFSTDNLVRPFMDTLASHQLYI

>NP\_001017181.1 presenilin-2 [Xenopustropicalis]

MITFANSSDSEDECNERTSLITSQSPPLPSYQDGLQASGGSESSDPMKTQTDQVIEDVPNGRTSGADAYNSDAAMENEEEEELTLKYGAKHVIMLFVVPVTLCMVVVVATIKSVSFYTEKDGQLIYTPFSEDTTSVGQRLNSVNLNTLIMISVIVMTIFLVLLYKYRCYKFIHGWLILSSLMLLFFMFTYIYLSEVFKTYNIAMDYPTLFMVIWNFGAVGMICIHWKGPLQLQAYLIMISALMALVFIKYLPEWSAWVILGAI SVYDLLAVLCPKGPLRMLVETAQERNEPIFPALIYSSAMVWTVGMADSATADGRMNQQVQRTDRNAPNHTNSSQEDAAETSVQTSNVSSEDPEERGVKLGDFIFYSVLVGKAAATASGDWNTTLACFVAILIGLCLTLLLLLAVFKKALPALPISITFGLIFYFSTDNIVRPFMDTLASHQMYI

>XP\_003216113.1 PREDICTED: presenilin-2 [Anolis carolinensis]  
MITFMNNSDSEEEESCNERSTLSMAESPLLPYHDVSOAPAATETQTHRKRRTGSSGSNKATADGNVPESDGRTRGSVALDNVEEELTLKYGAKHVIMLFVVPVTLCMVVVVATIKSVRFYTEKNGQLIYTPFSEDTPYVGQRLSSVNLNTLIMISVILVMTIFLVVLYKYRCYKFIHGWLILSSLMLLFLFTYIYLGEVLKTYNVAMDYPTLFFVIWNFGAVGMICIHWKGPLQLQAYLIMISALMALVFIKYLPEWSAWVILGGISYDYLAVLCPKGPLRMLVETAQERNEPIFPALIYSSAMIWTVGMAKPDGRRGSSEETWDLAEGAENHQNSSYTDPEISERRHLDGQAGQVEQTDRLQGMGHNLEEMEEEEERGVKLGDFIFYSVLVGKAAATASGDWNTTLACFVAILIGLCLTLLLLLAVFKKALPALPISITFGLIFYFSTDNLVQPFMDTLAAHQLYI

>NP\_571589.2 presenilin-2 [Danio rerio]  
MNTSDSEEDSYNERSALVQSESPVPSYNQDNAMSLPQDQDTSKRSGAVRSRSASGSGDAGPVDREERADTPDGGEEELTLKYGAKHVIMLFIPVTLCMVVVVATIKSVSFYTEKSGQRLIYTPFEEDPNSVGQRLNLSVNLTLVMI SVIVFMTIILVLLYKYRCYKFIHGWLILSSLMLLFWFSFMYLGEVFKTYNVAMDYPTLVMI IWNFGVVGMI CIHWKGPLRLQAYLIVISALMALVFIKYLPEWSAWVILGAI SIYDLIAVLCPKGPLRMLVETAQERNEPIFPALIYSSAMVWTVGMADSNPDSAGERRRSGGGVRTQEGVESEDDAPQAGRRQYSAEEDLEE DRGVKLGDFIFYSVLVGKAAATGGDWNNTTLACFVAILIGLCLTLLLLLAI FKKALPALPISITFGLVIFYFSTDNLV RPFMDSLAAHQYYI

>XP\_003972298.1 PREDICTED: presenilin-2 [Takifugurubripes]  
MNSSDSDDDSYNERSALVPSQNPVAVPSYRPTVDPRSPIAQPCQKQAGNRREGPPDSSGGSDQDIDMDDEELTLKYGAKHVIMLFIPVTLCMVVVVTTIKSVSFYSEKSDQQLIYTPFTENTSSVGRLLNLSVNLNTIIMISVIVMTIFLVVLYKYRCYKFIHGWLILSSLMLLFWFSFMYLGEVFKTYNVAMDYPTVGLLIWNFGAVGMICIHWKGPLQLQIYLILISALMALVFIKYLPEWSAWVILGAI SVYDLVAVLSPKGPLRMLVETAQERNEPIFPALIYSSAMWAVGMAKPVDPHSGRETDEEVMQSCTEQLSPHSPAETEPETDRGVKLGDFIFYSVLVGKAAATGGDWNNTTLACFVAILIGLCLTLLLLLAI FKKALPALPISITFGLIFYFSTDFLVQPFMDNLAHQFYI

>XP\_001326572.1 Clan AD, family A22, presenilin-like aspartic peptidase [Trichomonas vaginalis G3]  
MGKKVGIHTFLEFYARKVAKI AVPVVLT LILD AVCIRFIER THGSAELNRNFVDTMSRNDSGISVTASIW SAVGIIFMIIVVTA ILLTLYYFGCMKIIFGWLILAVSLLL SMYFLVGFGTYP SIVNIPVDYLSLAVFLN LVVVGNM SIFWRAPQRITQAFVLVILSILTSIVFRYLPDWTVWILLVLLI IYDACVVLCPNGLLILLKKS EERGD AIPALLY SAAAWEEADPEKGNQNNEEGDGNEGNQEDPAEQADNQNNEEEEEEEEAENNPQENA NGEAQNGNQNKKKKNMSKRDNEG IKLGLGDFVIFYGILVSRAARIGWDITILCIFA VILGLSLTLVCLA VWERPLPALPFSLALGIVFFIIGAMTFRQFCEHMRWGLVAF

>XP\_006677768.1 hypothetical protein BATDEDRAFT\_10859 [Batrachochytrium dendrobatidis JAM81]  
MLGTTLLFVAALPLDYISFAFFLWNLVAVGLAVIFWKGPLFIQGGYLILMSSMMAFSLSQLPDLVTWILLGLLAIWDLIAVLCPFGPLRLLLESAQTQDQQLPAALLYTDLSSRGIELETMGDIRQNHGINTSNHDNIEIPPVDDTDDDEDSGLKLGDFVIFYSVLLTNPTLPLCRLALFDWITTMSTIVAVTAGLSMTIFFLAVYRKPLPALPFSIAFGILIFYFLSAITLTPFLDHFVIRPPIIIPPTVGSSSLWVGKSVGGMIYL

>XP\_009493699.1 hypothetical protein H696\_01527 [Fonticulaalba]  
MASSLFRAAPLMADTFTQAQPPVAPGTEQSAMPAQSAPPAHPTSMPTPGTPPPALVDPFFSGRGPTGQEADLLGEGLVTHEAHDDGAGAFDDGRLDARPELDGADGDDDDDDDDDDDDDLAMTPRVAAQFYLPQIYGLFASLFATFFLVIWVAPTIFLSVPFNVTGVVLTGTNTLSTGSQLLVAVASAAIILVILVNTVILLALFY YGYIRVIYGWLIVATGLILSFIGGIVFYRLLETYNLPVDWVTFCLLNFNSVVGLLAVFGKLTLRMQQVYLVIVSALVATNLSGLPSWTAWAVLIVVSIYDLFAVLCPQGPLNLLINLSQTRQOSIPALLY SAGMARLAS

SNDDSVPIAFTAGTSDSDSGDEQPEDADTQVGGQALLSSGHLESVLLGEAMPASAASDLDSAAPPAIDSTTG  
NPILDAETGPKDVSDEQDDGDDDDGEDGDEPPGRGPVQLGLGDYIFYSLLVARGALTSDDGSDGGASAAIA  
VISCVLSTLVGLGLTSLALLFRKPLPALPISIGLGILAYVFS AFLSTPMVEMTRQVVVFV

>XP\_009496662.1 hypothetical protein H696\_04506 [Fonticulaalba]  
MADPPGAGDPLAGRRPVHPTGQGEVLYDDLSFEGIGAAINNSRLGPGPPADPRVPLSEYTASEDPLSGP  
MPGAAESADMQQPSPTDSSGQDPGYGGTVDSTDQLFVAPLVLDDEEDPGQTQPGEEPADGGDGGGGGGM  
TVEDVRHYVRQIDHIFRPVLICMCLVIWVVKVEAVMRADTDGMRLFGFSTVETGDNIGGFIIDAIISAA  
VIIMTIIILAVMFWFGLFKIIFGYLIFSTGVLLGGMGALFAISQSLALNIPMDYITIVFAAVNFAVGGVLV  
VFYCSHLRLQQAYLTVMSALLAWSLTRINEITTWVLLGLLVIWDIIAVLTPCGPLKLLIAASRRHQKDIP  
ALLYSVTMVWFMAHDPEHGILGGGKSSDASPVDSSEVLAPVRTGGRHGGNGGRRRQSTPPRGALLTDE  
GVELHDLTGVPVSPPEHAPASEGDLRSGTEAEAADVDPHLADADPDAADTGAQEDEDAPPAEAKARDGLK  
LGLGDFVFYSVLLGRAALSDWTTTCLVAVSAGLMSTIFLLAFFRRALPALPISLVLGIIFFFVTRAVI  
TPFVLEHVSQVGL

>XP\_001312406.1 Clan AD, family A22, presenilin-like aspartic peptidase  
[Trichomonas vaginalis G3]  
MKIAIPVVITLLLDVFLTRLKEQSFLNNTIDRTITVFTRTSSSSSGISTKWAIILAVILVAGIFLVTIVL  
LLLYYYGCTKCIIVWMVIAVTLSSYYVYLAVGEIPSLNWPIDWITVVFLLNIVIVGNMAVFWRAPKI  
VTQIILILISVMTCCVFLFLPDWTWVLLLGMLVIYDICVVLCPRGPLQLLIKKSQERGDALPALIYSSAA  
YTWKDGPPEEEEEESHEIQIDRSTEQEENNQSNEPSTHESNEQTNQETNEQEDKKPLEKDPENGGHKKHKKR  
RPPKFKPLGSKKIHPAEPKELNSEQSTESSSSSSSSSEDDSEALELESKEGIKLGLGDFVFYGIILISRA  
ARKGWDTSVVCIEAVLLGLSITLIFLAILERPLPALPFSVLVGIIFYFIMPYTLKPFALNLRKLLLVY

>XP\_001299078.1 Clan AD, family A22, presenilin-like aspartic peptidase  
[Trichomonas vaginalis G3]  
MPIKVTKEHFLEIYSKRIYKIAVPVILTVIDVWLTRTLEEKFDNTALSTSFASVVSQSSGGVSTAVAIY  
IAIGFIVAIALVTGLLLLLWFNCVKCIYVWVAVSLLSYYVYLAVGKIPSLYNIPIDYIAVVFLLN  
GVVVGMSIFWRAPPVITQAFMIWISVMTACVFLTLPDWTWVILLVLLIWDCCVVLCPNGLLHLLIKKS  
QERGDALPALYSSAAFFKEADDGEEQNEEGEDHENLDNYDEEYDSASEDESDPDSSASSDDALPINP  
DEFVGLSNNPEDQPPPQPKPEQQPESELAQPAGEPTKPKKRPNDQNHGDPENPDKRKKS SAKSTPT  
SEGVKLGDFIFYGILVTRAARVGDIAILDILAVMDGLALTLICLAYFERPLPALPFSALGIIFYLI  
GAYTFRGFSTNLRKLVLF

>XP\_004349389.2 Presenilin2 [Capsasporaowczarzaki ATCC 30864]  
MSSGGKLARSDDSTDSVTADTPLLTPSSPTSAPAPSYSTTTTTTGTSPNPASSSSSDQQRRTASAAL  
GSSPYSSSSSFSSAAAAPLNAEMASRGNFDTQSVSSVSTDQLLSPTQPQRSQQLLEDAQERRRQQSAA  
ATQNSQPGAAAAPQPPRAVAPQGNANSLNGNERTDAAGSPNAGANAAGDAAEGEEDEDEELKYGAKEV  
MALIVPVTLCMAIVVASIQSITYYAQDSGDYLAIAFKEDSDSGAENFGGAIINALIIVGVILVMTCVLV  
LLYKYRCYKAIWMLFLSTVMLLFLFTYIYLELVFDRYNVAMDWVTFAFVIWNFGCVGVAVHWKAPLLL  
QQAYLITTSALLALTLIKHLPEWTTWVLLAAIAVYDLFAVLCPRGPKVLVETAQERNEPIFPALIYSST  
MAWIAVAAVDKPVPSEDAEEVPQLQAARNDPEAAPVSTAQPTAPAAARQRRTGTNAGAAADEDEATNATA  
AAEQSQDSTAPAEDDEEHGVKLGDFIFYSVLVGKASVSNNWSTILSCFFAILVGLCLTLVLLAIYRRA  
LPALPISIAFGLLFYYSNEVLVFPNNQLSAVQVVF  
>XP\_003882351.1 conserved hypothetical protein [Neosporacanium Liverpool]  
MRELRFPSGLGAESEGTGPAPRVPLVSDSSPSDRAPPRNFDRDGIHPGASRIQRLEVIHQGLVAALRKE  
AKQVATLLVTGLLRPVIICMLTATLLSFVLTSSSFALFPRVSPLTAPSLSPSSSDPHSSEGDAARLP  
SFPSSSLRQTRSLVRDFSRGLGAVCHIFSSFCGIFSTVFDLSLDVLIYVAVLTFCLALAVRRGWHRF  
YYVMASASFSLAAGCGGAIYLFTRCYLQPEEGGFTANASFSSTLLADKNHGVPPETDAANRDVIGSED  
RKRLCFFLSHLIGLLAKIPEHVSTVSFLPQPDVTVLVALWNLVSLGGAFVLLWLAPIGIRSQLLVASVA  
SAFTLHVLLHFGVNYSPESPSTPTTVLLLCMAAWDLFAVLSPWGPLRWILQGTSAADARPMPLLAYEAS  
VARPLLSGESVRSAPMAPEPTGPGVSSVWERPSGMRTPGALRLQAEPRLQLEQGETATVIGYTGSEARVR  
VRLLEPDSIRNYLVKQNMRLPLEAGFIQDERARVHAETRRRQOASASAPGDSQPSSREERSPPSEA  
RRKQPCPAETQSRGSETLRGVHELPAFAFGQLSVRTLGAARGGAEPRVIRNAEREGERHRTEACLAT  
TGRELKETIRDGEKQEGGAHRKFSHTGPPRNGVTNREERGGETVEGQPAAGLAGHSGEGEAAEERERTL  
EIEIAVAKRQLHRLRRNGRAMLGLGDFVFYSLLACNLTSSWSFEAGLAASVAVWAGLVITSLGTTFGSRP

FLPALPLSIIILGLGVGAGIFYFVEPQADFLISVDAFF

---

>XP\_018637326.1 hypothetical protein TGME49\_204040 [Toxoplasma gondii ME49]  
MREVRGVPQTEGERSDGHQRLPPTPRSSRPALAPESAFETDGRGRTLRLQRLERMHCQLVSAIRREANQ  
VATLLVTGLLRPVVICMLTATLMSLLLTSPSPPLPTAPPPCFPSPDPPSCVSSSSTADAPSEGGSVSL  
SSSPASSLRRSRSFVRDVSRAVCTVRRLFSLVHGEFVSHFFELGLDALLYVAVLTFGLALAIRWGWHRLL  
YYLMASAAAFSLVAGCGGAVYLFACRYLQPKAGAVTQNVAFAPAGKAPVFRQETNGDDGGVLVATEQNSLL  
AFVSHSVFSTSHLKDGVSSLSVAPQLDVTVLVLIALWNL CVGGAFALLWLAPLRIRSQFLVATSSAAAF  
QLLLLHFGAKYSPESPSTPTTFLLLCLAAWDIFAVLSPWGPLRWILQGLRSTDARPMPLLAYEASLARPV  
LPHAGVRSARMASEPAGPGAPSARDTPSGVWTPGSLWSVAEPGSPQRGEAGETRTGVNGREVRIRMRLP  
EYGRSRRSCLAEEQNLQLEPLAAGFLIQDERSRFD AEVRRRHI SEAAAAGGDSQASRSRGRSRGQPVLEET  
ERRNGGSLTGVQGMVAVTGVGQLGVYTPREVGRGGAEQRAPEDAECDGEGRESSKARLSFAGGEQETMRG  
GEEVEEDVNGRVRSRGESERHRPNTQEGRGAATREGWPTGDPLGRSNETETAEREKILEMEIATIKQQL  
HRLGRGSGRAMLGLGDFVYFYSLLACNLTSWSLAAGLAGSVAVVWGLIITAAGTTFGCPCHFLPALPLSIVL  
GLGVGTGVFYFVEPQAEYLISVDAFF

---

>XP\_008884684.1 hypothetical protein HHA\_204040 [Hammondiahammondi]  
MREVRGVPQTEGETCDEPQRVSPASRSPGALAPERAFERDGR CRTLERIQKLERMHCQLVSVIRREAKQ  
VSTLLVTGLLRPVVICMLIATLLSLLLTSPSLPSPVPPHFPSPASPSRVSSSSTADAPSDGGGVS  
SSAASSLRRSRSFVRDVSRAVCTVRCLFSLVQREFVSHLFQSLDALLYVAVLTFGLALAIRWGWHRLLY  
YLMASAAAFSLVAGCGGAVYLFACRYLQPKAGKLT PNVAF PADKAPV FHRETNGDDGGVLVATEQSNLLA  
FLSHSVFFTNHLKDGVSSLSVDPQLDVTVLVLIALWNL CVGGAFALLWLAPLRIRSQFLVATSSAAAF  
QLLLLHFGAKYSPESPSTPTTFLLLCLAAWDIFAVLSPWGPLRWILQGLRSADARPMPLLAYEVS  
SHASDRSARVAPEPAGPGAPSADWTPSGVWTPGPLRSVAEPGSLQRGEAGETRTGVNGREVRIRMRLPE  
SGSRRSCLAEEQNLRLLEPLAAGFLIQDERARFEAEVWRRHI SEAAAASGD SHASGRSRRRQPVLEETE  
RRNGGPPPTGVQGMVAVTAVGQLGVYTPREAGRGGAEQRASEDAECDREGRQSSKVCLS FAGREQETMRG  
EEEVEEDVNGKVRTRGESERHRPNKQEGRGAATREGWPAGDWLGRNRNETETAEREKILEMEIAAIKQQLH  
RLGRGSGRAMLGLGDFVYFYSLLACNLTSWSFAAGLAGSVAVVWGLIITAAGTTFGCPFLPALPLSIALG  
LGVGAGVYFVEPQAEYLISVDAFF

>XP\_012899044.1 uncharacterized protein [Blastocystishominis]  
MSQEDANISPSAKEEKNLLNDSTYVIWYGVNHLASIVIPVGLTMLFSAILVNVVRPASFTSALEQGLTV  
YMVYKQEADNTWDSIWQAVINSLVIVLFIGLMTFIMVILYKYNCIKVLYGLLYFSTFMAIGYTGWVIFYM  
AAMQYQFSCDLFSSAFIFFN LGVSVISIFGTYAPPLVKKAF LIFISCLVCYLLSFFPDWTTWILLIAMA  
LYDICAVLTPCGPLKLLINISQNRDDAIPGLLYETTL DHDGGLPIDETPDEGVI PAGEGVIDGDYVAD  
SEIEME EGGKINRIFEKESVSLGLGDFIFYSLMVSKASLASSVPFVVFVVIILTGLLLTMAFLSVLEMAL  
PALPFSMILGVVTYALTYFVVTAMTNQFALNGVLF

>XP\_008862967.1 hypothetical protein H310\_01595 [Aphanomycesinvadans]  
MNATSVPLMAKPTRQRL ENELDTQESPEVDIEDLMHSLGSFQAVLLPVTLTMVLS SFFASILIRDPDAAAQ  
MAQAYLVYKPDSDSDSALLGHAFVNALAI VCFIVATFVIVICYKFKFTNFLVGYMFLSSAVLLGFLGG  
RLAEVALENLSVPVDVWSYWFIMYNFAVVGVL SIFYQKGVNMSLTQSYLVAVSII MAWQLSKFPEWTTWA  
LVVVLA FYDLCAVLT PCGPLKCLVNI IQEGRPLPGLLYEAEVQRTFHSDAHSYQYRGGPPCPEQATG  
TQTTCTFTRRRSRPDD SHEPLLAASSTDTSEM TTTAKLPLRDRLVAFYNEYNPSAI ERVDQVLA IYEGR  
ERDLWNDLAAKYGPHDDDEDNTIKLGLGDFVYFYSVLVSRAMFDMAMIACLVSILMGLGSTLFLLSVY  
KKALPALPISILLGVAIYLWVRFVLVDFMDSTVVMQ

>XP\_008860947.1 hypothetical protein H310\_00092 [Aphanomycesinvadans]  
MATEAFKTTTFDEPLLAPHHHPPPKDSPSSSFLGYGLSLGTVV TQLNSFLAVLWPVQVTMVLASIVAVSM  
RDPDAERSMSRYLYYKIDIDESIESTSTKVMEALTNALV IFFIAIVTFVAVL MYKVN CMGGLQGYLMASS  
ATLLGLVGSVLAEKIVCERLLWHVDAISMTFVMYNFAIVGTLSIFYQKGVSPDVGRAYLVVTSVIMSWQL  
CQLPSWSTWAILCGLAFWDLFAVLT PCGPLRCLVNIHSEGRPMPGLLYEAEIKATHKNSPNYTNGSFYT  
AHNLQAAHGAGVYKAPLYTSQTAPIVYAI PVAGASTNLARQQVVFENQLLEFCRDYNSPHSDHVATVAKQ  
YLHKQOECWQLLYTKYNVSYIRSNRSYPSYAEVFDGTPMPDLDTQEKETIKLGLGDFIFYSVLVARAAMT  
SFGAFIACFLCVIVGLAITMYLLGHFNALPALPISILLGVSAFFWMAQMANDYLAFLVFRGVC

>XP\_008864272.1 hypothetical protein H310\_02517 [Aphanomycesinvadans]

MRGTATDVATVATDKTLQERDGLIRNGSMPI SNGVPPSAPKYEQVMT PSEGIVPASSDHPGDAPTSAPHV  
SADEQQEREETAEDLMHGINSFWAVVWPVCVTMVIASVAVVNCRSRALERSMGSYLVYNEVQGADAGQVV  
GHSLVNALVVIGFVTGLTFFMALLYKFNCRMLVGYIMFSSSAILGFVGGQLVDTVNDTYLHWPIDWVSF  
LFIMVNF SFVGVVAIFYQKGVAKWIQNTYLVLVSVILAWQFSMWPEWTTWIFC IMFACYDLCAVLT PCGP  
LKVLINLIQEKQAPMPGLLYEAEVRDGVGNAAAHNS SATAPAPRRPPTSSSGPSSAARPPREPRQIDPPP  
TAVPPSLDGVDLTAPFDVHDCATEDEFKALLFAFYARYSPDDTWKVDQVAARFFANQPRMWPSLFHKYMV  
CSCGT DGVPCSVQIAIDLNRQQRRDHDHDDDDKTIKLGDFIFYSVLVGRAAIFDFTTCVICFVCILMG  
LGGTLFLLSVLHKALPALPISIFLATAFYFWARYTLTAFCTFVTSVPSAL

>XP\_008864273.1 hypothetical protein, variant [Aphanomyces invadans]  
MCGLDGGFFNVGRRAAVPVWCVLLSSRCGGAMPNARLTRQFPWRRASRRRHGQPSSGGGEWFGWLARCFRA  
NGCVQGVAKWIQNTYLVLVSVILAWQFSMWPEWTTWIFC IMFACYDLCAVLT PCGPLKVLINLIQEKQAP  
MPGLLYEAEVRDGVGNAAAHNS SATAPAPRRPPTSSSGPSSAARPPREPRQIDPPPTAVPPSLDGVDLTA  
PFDVHDCATEDEFKALLFAFYARYSPDDTWKVDQVAARFFANQPRMWPSLFHKYMVCSGT DGVPCSVQI  
AIDLNRQQRRDHDHDDDDKTIKLGDFIFYSVLVGRAAIFDFTTCVICFVCILMGLGGTLFLLSVLHKA  
LPALPISIFLATAFYFWARYTLTAFCTFVTSVPSAL

>XP\_008615248.1 hypothetical protein SDRG\_11008 [Saprolegniadiclina VS20]  
MNATSVPLMAPPTRQAPEDMEAGAI DVHDILHSLG SFRAVLLPVTMTMLLSSLASAVLTD PETADQIAHA  
YLVL PEDGESDGSLLGHAI VNALAIVGVFVIATFVIVFCYKQFTN FLVGYMFFSSAVLLGILGGHLAT  
VLLERLDVAVDILSWSIVMYNFAIVGVLSIFYQKGLPMSVTQSYLVAVSVIMAWQLSKFPEWTTWALVVV  
LAFYDLCAVLT PCGPLKCLVNLIQSEGRPLPGLLYEAEVQTRFDHSEPNYYQHGGPLPAITTTTTASDVC  
SFARRRSK PQDEDEESLEKEAQTEPLLPQPVAKKPKPSVRDRLVAFYTA YNPDALSRIDNILAMYEGRE  
GDLWRDLERKYGLD TDDEEDNTIKLGDFIFYSVLVSRALYDVAAMWACAVAILVGLGGTLFLLGIHK  
QALPALPISILLGVAVYVWMRCVLFEFMNVTLALGIEM

>XP\_008610558.1 hypothetical protein SDRG\_06555 [Saprolegniadiclina VS20]  
MDAVGKQLYDEPLLDRSINEPAPSLGGLSLASVITQLNSFLAVLWPVLITMVLTSLVAVSVQDSETQAA  
MNQYLYYKDI DASSATAGTKTIEALTNALVVIFFIAIVTFVVVLLYKVN CMIGLTGYLMLSSSTLLGLVG  
SALVQKIFCGLFHRLEVYTTSLIMYNFAIVGTVSIFYQKGVSPNIGRMYLILTSVIMAWQLCQLPEWST  
WAILFALAFWDLFAVLT PCGPLRCLVNLIQSEGRPMPGLLYEAEIHDGHVRKHKSGSTRALPMA PAASSD  
MEMVQRRSDDAFLT FESQLRDFCVDVGSPNGHHVRAVALQYVDRQKDCWRMLYTKYNITFVA AHKSYPDV  
ALVFADAGQHARETIKLGDFIFYSVLVARAAMTGFAAFVACFVCV IIGLAATMYLLAHFNALPALPI  
SVLLGILCFFLMVQMGSPFVDALVFRGIC

>XP\_008610969.1 hypothetical protein SDRG\_06936 [Saprolegniadiclina VS20]  
MPQYGDVVTGPGSGGRDNDRAALMAEDGRVIAVTVPTTYGEVATPTPPEEQARQRAEDAATREEAAGDLMH  
GVNSFWAVLWPVCVTMVIASVAVVNF RSAALQASMSTYLVYNEVQGAKTGTVVGHSLVNALVVIGFVTVL  
TFCMALLYKFNCKMLLVGYIMFSSSAILGFEGGQLVDTVFNDRLHWPLDWISFLFIMVNF AFGVAAIFY  
QKGI PKLVQNA YLVLSVILAWQFSMWPEWTTWIFCFMFACYDLCAVLT PCGPLKVLIGLIEQKQAPMPG  
LLYEAEQIR DGVGNRRQQHQQEDEQQQQQQQRQPQPQRPPQPPAPVKSTPAPPAARQPA AEPSTASY  
TIELSTSHADHVDDT PFESYPCETEAEFEALLGAFYQRYSPNDVWKVEQVA AKFFLKQDRMWPSMFHKY  
LVCSCGTASTPCDVQMAIDIRNARREERAAEAEDDNTIKLGDFIFYSVLVGRAMYDFSTFVVCFLCI  
LMGLGGTLFLLSVLHKALPALPISIFLSVAFYFWSRATFVDFCNFVTVLPSAL

>XP\_002288037.1 presenilin, partial [Thalassiosirapseudonana CCMP1335]  
DSTGKQLALDFANGLVIVTVIGTMTFGIVLLYKYRCMKFLMGYMAFSSMTLLGVLGAELFNVAIEKYRIP  
IDWFTFVFSMFNFVAVGVTSIFYAKGIPPYITQTYLICSSVIIAWQLSHFDTISTWTL LIMLALYDLCAV  
LTPVGPLRLLVNLM SDEDSPEMPGLLYEAEIPEGLKRPVMGGRNKDDNGDEGEHDDSSQSPASMSAERY  
QQPSIKENGVPGR TSSDVSASQGD SAPGVEMSSAVNRTRNDSYDSVTL DQSENNATTT PDLAPAHASS  
AKTAMIPFAIAELFNTIKLGDFIFYSVLVAKSAQYSFACFVSSFLVVLVAGLGGTLVLLAVFKHALPA  
LPISIFLAVTFYVTRFIIIEPW

>XP\_002290889.1 presenilin [Thalassiosirapseudonana CCMP1335]  
MILSSLSVIYINTPSTKAAGEAALSSTYQVFTISDDQSKAASLGLSLVNLVIVSVIGLMTFLIVILYKF  
RCMKFLLGYMILATTVLLGFLG SQMFTVAINKYQLPIDKLSFYLTMYNFAIVGT LAFYQKGVPTIVNQG  
YLVANSTIVAWQLSYFNDWMAWALLIMLALYDLFAVLT PCGPLKALVNLM SKEDAPAMPGLLYEAE LPVN

AVRPGRRRRKWRHQRYSAKTKSRKKRQNTQQSTTSSNNEDEMTQSDNQEQPVIQMMEEVPKECEDDEKG  
GNTIKLGLGDFIFYSVLVSKAAENGFAAFVACFLSILTGLGGTLVLLAVYHHPALPALPISIFLAVVFFVL  
TIYCMEPWIQDMWQVPYYF

>XP\_002176847.1 predicted protein [Phaeodactylumtricornutum CCAP 1055/1]  
MANALIMVSFICALTFVIVLLYHLRFMKCLIGYMIISSGTLGLVGGNMMQVAVAIYEIPVDKLTIFYGFI  
YNFCVVGVLAIFFGRGIPKSVTQGYLIATSIVILAWHLSYFDDWTTWTLMLLALYDLCAVLTPCGPKAL  
VNLMSQDDSPDMPGLLFEAELPPEAKRPGGKSRPDNSAETNSQVTSHQEGSGLVKSTEQDQAGNDGHN  
SIRLGLGDFIFYSVLVAKAAQYSFATFAACLLVILAGLGGTLVLLSVYHSALPALPISIFLGVIFYILTR  
WSVEPWIEAILTRPYV

>XP\_002176848.1 predicted protein, partial [Phaeodactylumtricornutum CCAP  
1055/1]  
DSLNGIIIVCVVICALTFFIVILYKYRCMKILLGYMILSSMLLLGLFCSIMFEVAIDRYELNVDVLSFYF  
FLYNFSVVGTVAIFFGKGIPIPFVTQGYLIATSIVIVAWQLAFFDAWTAWVLLVLLALYDLFAVLTPCGPK  
ALVNLMQOEDAPDMPGLLYEASGRNSIKLGLGDFIFYSILVSKAAIYSFATFAASSLAILAGLGLTLLLL  
AIRGQALPALPISIFLGVVFFYLTRYVLEPWVEELFLHQVYI

>CBN74004.1 conserved unknown protein [Ectocarpussiliculosus]  
MASTAEPIEDSDAGVGAEEEARAPLLEEGHGTLPHPHRRRTAQGNPDENGQDDGALDQADVAYSANSFM  
AVVKPVTLCMTLSAFITVSLYSDAEGATNSALSVYEVYDESTTTLDPSSVRLGKSFVNALIIVLVLAAT  
FVIVWYMMRCMRCVGYMAMMSAVLLGVMGGAVWAAALEVYQLPCDAFTYYGVLWNFAVVGVAIFYQK  
GIPTVVTQAYLVATSIIMAWQLSRFEWWTGWCLLVVLYALYDLCAVLTPCGPKALVNLMQEYEEPMPGLL  
YEAELPAGPPRRRRPENDRRAPSQQARREQPGATGGPQEGDVSSSPRAPVGTATMGGGGLADLAGGGDE  
EGGRGADDETPAAPVSAEAAAVVEPQSSSPGGDHSSARRPGADSAGASESVAAPLLELVESGTA AVAVGD  
ASADGSGTRSGREQKRRLATVRRGIRGGGCLDPEPPGWRTVQAEEKLELFSVPVPTSSRAAAAENDEDE  
EEMGVSIKLGLGDFVYFYSVLVSKAALYGFTA WAACVVVIVFGLGATLVLLAVYRMALPALPISIGFGTVF  
YLLTRFSIQPYVEALNETPLYF

>XP\_009040959.1 hypothetical protein AURANDRAFT\_67233  
[Aureococcusanophagefferens]  
MVASRSLVCGLLAAASGFVVPAAHRRHAPRLRAAAKDDGGLGQAI DAAAEMASAPAI AATL PANRRS  
LALWRVWGCSWWSQVILSVISAVVLV FARVSTPATANSVAGALNGGFLFASLGAGFAFASAYDPYEENLW  
LDDGDEEALTFGNEQLTSLGEGNAFGDSTVADVADDFRPI SYVADAILGFGIPPIRDDARIADILDAD  
QAFALLEAVTSLDAAEVEDAYVAFDLARVAGLLEAPLAEVFAACVDEGFGLPHGVETQLRREQYEALRSR  
FGFAAYAPDPLDKVYEDFGFKPLDETAEPDPEARKMPEYVQDADRPTYQDGAPETYCDMRSCAGFPQQL  
TNSLRPRLRVPLRCASMRARSSVTKAAVASRAPPPKRHGF DAGDASYALASFGAVVRPVSATMLVASFFV  
VTVRVETGSLVVYDDD PADSGLERVKGGAANAGVVV CALLAATLAVLALYKFRCTRI LRGYMMLSSGLLL  
GLLGGVLVLASLEELGLEFADLASFGLCAYNGAVLVGLAIYEPAYLRFPKAATQAALVVAVVMAWQLSH  
YPPVTSWCLLVALAAYDAFAVLAPCGPLRVLVQLMGETGEPLPGLLYEADLDGDGDGAGAGAPSSVKL  
GLGDFVYFYSVLVSNFSSHAASGAACFVATLLGLGVTFLLLALHRAPLPALPVSIAAGVASVYLVEYAVL  
PLAGALRAARAVA

>EWM27520.1 presenilin-like protein [Nannochloropsisgaditana]  
MSRTSPSLPDSL PASHVRREPTSTSYEGRSPQLPLADASRAEGLDIEDVLYSANSFWAVLKPVALTMFLA  
SLVVVNVAFATEDQGVSVYAI DDGDADGNGGDSNSVKLGKSLVNALTIVGVICGATFVVVLLYKFRCKC  
LFGYMALSSMTLLGLMGLLWY TALIRWDLPCDYFTFVIVLYNF AFVGVVAIFYQKGIPTVVTQGYLVMI  
SVIMAWQLSRFEWWTGWALLVVLALYDLCAVLTPCGPLRYLVGLMQEYNEPMPGLLYEAELPGHARHHR  
IPPSTALRGSERATGALASAGSLDGGCEGDDVRLQAPVGDGAFSPAMALGSQAHTVHSTSPPSPLDLL  
DGTQSSPGGTHLGQHHPPHSRSLRRVSRSQGGETLLEDGMGSPVEGGNEHGGESERGERGESGRGHGPS  
EGLSSSSHQGGTPEQERSIKLGLGDFVYFYSVLVSKAALYGFATCAACFLVI IAGLGATLVLLSVFRKAL  
PALPISIGLVLFYLLTRVAIIPYIDALVSTPIYV

>jgi-gw1.9.112.1|Bigelowiella natans|24448|

FPLDIITYFLVIVNFTIGGLVSMRTRLRRTIFNRAYLVCLCLSLVWPF AEFPEWTVWCTLGLITLYDLLAVLAPCGPLRFIM  
ERELSTASSLPGLMYPGEFFRIGLGDVFYGVLIARSMFVDSNTTIACSI VVVGLIVTIIITRSIRSLRAIPALPVS VVLGFVF  
YAATPLVINP

>ETO23872 peptide: ETO23872 pep:ANNOTATED\_protein\_coding- Reticulomyxa filose

EEEEEEEEKKEPDNNSDSDNNNNNNNNNNNDNEEKIEMYALTKPYSFYKFWQTNEAH  
VSNVTSNVKQCLQKAYDANKTRAI VVYDEGTECNEIEILADEGPLLDGAEGQEYVFLTIS  
AWSQFCNIFWPVLFVMLATIFFTAQLQRYGTLVQNADTSTTTIYLPNQPTSTSN DTPYLF  
YALAAFLAVIVIICIGYRCQRQCQRVFRFCLMADIFLILLIGALILGFILCYNYNWTTDL  
ISYLILTWNFGVIGTVTFYCPVPGVVHRMFSVFLNTVMSIIIASTSGWYVIFVFLMVAI  
DVVAMVRAGFGAVFTPFLFPTDVLVNTTPRIFYEVYGLRVRASDFMFYGLMTGAVQLQL  
VLSLILIAVLSSFVICIFVCPFFSKQLRPLPFAFLSLLLAVL FQSQIFSSFINHQKWKL

ASP

>XP\_653696.1 presenilin 1 peptidase [Entamoebahistolytica HM-1:IMSS]  
MSDTTHYHRLKEEDDENLNKEIDTLSEQNEIHVISDEQQLSKNKVENKENKSDEEEVEMITFAEYSESVN  
AVITPVAITLLLLTVIIVKLLERSNDLYSQATS YIFSEGIESTTIPIWLI AII VSVIFIIMIVIVTFV FV  
LLFYRCKMLIVGWLLFSVILLMLFGGSIMKSLLSVFNWPVDWISFAFLLFNFGVLGVISIFYISPMKL  
NQFYMI IISVFMASFFTNLPEWTTWTL LIGMACYDLVAVLCPKGPLRILVNLAQERKEPI PALVYSTAVW  
MGLASPDSSKNEILNVDSNPFTLSSTHGKGVKLGDFV FYSVLVGRCAMYDLTIVFSGSVAVLSGLFGT  
LILLVVFNKALPALPISIFFGTLIYCVSRWAIVPLVTTANLYGYVA

>XP\_020435220.1 presenilin family protein [Polysphondylium pallidum PN500]  
MSPKDKNEKSSPTPLEINNNNIENNSNNNNNIPTPKLLVNDIVININSNSNNKSNKNSNNNSI KKNNEY  
IDSDDSDIEIQCKSSVLFVSPKLT P VNNSSSSSNFSDKTQPSPIQITSDESTSDSDSEFEMAENEEL  
EPPCIIDYSDQMVSI AIPVFFTMVVVTA VIRAISVPDNQSSPPANRIDIPAGFKYDTPNIQQVFLNTL  
INSLIFLGVVVLSTVIMVILYKFKFMKALYGLMATSILLGVFGGFLFILILTYVNIALDYLT FV FVW  
NFSAGGIVCIFWFCKYLNQAYLICLSAFLALFLARFSPWTTWAILV LVS IYDIFAVLCPGGP LQ LIET  
ARKRGESIPALIYNASVFIGMAESES IEMNTTTTATQQQLLQNTNNSQKPSFPPTPTSIPINLPSQSEM  
IEPKSSPNSESMSTGVSTSELSESTDSVTLEKGRGIKLGLGDFV FYSVLVGRAAYKEIILVFICFVAILT  
GLFITLLLLLAVYKRALPALPIKMKFNKLLLV SILLIVHLFHKTNAFTITRISERLGYTDGGNLFRIESPD  
FPVLLPTLKVINGNKEAVFA YRGLVATNIYEWVPAKPMDLTILKKRGRDNDQQVRLHIILANTPNPLY  
QYDFNYVTPVIDDFKPKSNYLHQAGTSV TISGNYFKLHDYDTPDPEVRFDGVA VVTSASGFKIICVAPTA  
VAVNDLV LKVR LATGKEIKADFLFQ NIMPIVDDVSPNKAVSQVSKNIKIYKEDSIIPEADQPATTIAIG  
GQPCTNVRFLQKGVISCDTPLLTVAAGLSTPFDITIQIRATVFTHPKFIVYTPVISNFLPKFSLAAGGT  
RVVVSGRHLNDIDAIRIGDSNCVVDYNSYNKDANTEVESISCTAASCDMGGLSEKVN NFNVIVDQIFNA  
GLNPTFTYYVPAIKSIEPESITEAIRKSIVIRANYVNSVTKVTIGGVDHIPSSVLHNNMIIVEINAASYQ  
PGSYDVTVAENILTNKLNLDIGPPDIIDLNIKKGFINSYTPVTFRVRSPVVPLEDMDTVIAFKIGTQF  
CEYLERTSNTEYTCVPPKGIVSTD L ISLVINGVEKITGFGFSYAIPTVTGQTQSSNIPMG GGNLVIDGL  
GLNFVTSIKFATSEIKISSCAVNGEVKITCPIPRFKVGNYPVSLVNVINGVDYSYLTGQSLAYVGPSLTS



VRPSQSTKERAHVITLTGTGFGTSAALISINIGATACTNIVIINNNANVSCSIAKLAFGTYPVTTITVQPN  
VLSAGVSSDVTVYSSTKLSCLGPALPKDNNPVDWWFIYKIKGELDEYLYIDSTMDFRQRHRDLQNHGD  
TASMMTPMEATFKVSYANYFYFMFFNDQPNRSDQDQKRGKSDSGFTSMRKNSDGKSAHGFKTMVFFDDPD  
PATNLSPGIHIAHSNPAFSPSNKNANAYNGPADGIKFLGAADFNQHFYAFDNIETAMEYVIKNDGNLQS  
EIHLFPNVAGWNQAEMNRYPYFYDYVSHYLNYPARVPAVNTPPRKTVPDFIKACDSIVANIAGQTLENIG  
NSYSDNRSPFKDLSSAQLNQISQFVWKEKKIDGIDIWLVVADTLRKKYFVEFFFAMSSVQMKVTEKILN  
VACFDLPPNYAKLDGSTIFTDYHFSGRKKEHAKMGFPVYPTFGANALGPNENYFCVGDNSNRHNGQGYRGG  
GVICIQNPYL VYFFNRMVRQYNTMDINNVTIDKIDSIGLFGYVGTQPIKVNREGAWTKTFEVEVKDYINGNH  
YSKLPKEIYPILASTRTAATDVNAKFNALRTRKTHAVGVNGERSVVPVPTLPNEPDILNYVSNDDL SLH  
YIGYDQTVGAICDYDAAATECTKAIARTTIIPTLPNYVRPIFPTVYEHVYAGAQLVYDYLTDNDHFKLI  
KFTSEFITKLPNAKRNFYQFQIAPVPALANPQFRPPFIIRQADAVCEEEVAYFMTLHYIYYQSGALDPAL  
LIYKIGTDAPNWANGVILAI SKKLYSELRPSLTPAVFNGCMNNIFPDFPNIIDTYREINYDMANPSNDKLV  
RRSAGAAWDWMETS YTNNGYGGKIDRVNNDQRILVADLLEAMI KARQNGRILTMKNLLRF INRKYI PGENF  
DAILVNNYII PRPLPVL RPLQMLFMMNPSSFSSHSQSLLTSSNSTNPLGQRPFIVQDERSLQPGVQQLFSV  
PSSSINSTDILSLTAYQIQKLELSFDKWVINGQSQA IQTLILDPTNQVNNQPILFIDELNRDFDGNVAVD  
LKYQDIGSTGTRATIASPLSIVSITFFLESIIISKSISKSQFGDFEVYLLPKKSNYNGVISSDLNGMIIS  
TLNSQLCDIQMNSESNFLSNFDTICSGIGPVITSVNQLSGSTNGGYMITVSGIRFNSTMTILIGTNECD  
STQFISSSKLACQVPKGVGKNNDILLSTPQMI FNLQRTKYL FNYDSPIIITSVQPDIINSYGSDLMTIYGS  
NFGDDVTNVKVLIDERLDCSPIVSLTSDSVACLTPSAIGDHR SITVIVKDQSTKLNLNTLETQSF SFGP  
QILSFI PSSGDPTDRIRILGDGFGHEEDSDLPPILFIGDNMVEITNFTNQFIEFQLEYENTNQPLIIQSG  
DQSIQTEFTYYPPLVTFINNSIVSTSGGLIQLGGYGLSLASNDNFNFKLNSQDIDCNPFDLFIECFVPPGI  
GSNYLLSATQSSGESIEFVENFTISYSAPKITSHILLDSSIQIIGSNFVPLEYGLSFNTSTSFIRLNYQD  
IHYDDCTTFESSKLAVCNSKLN MNELRSWLVLF

>XP\_020436456.1 presenilin family protein [Polysphondylium pallidum PN500]  
MSHRYSALSNDDEDDAKGILASPSDKNPFEDDGEVDLLTTTTTTTTTTTTSTNNHQNNNNNLDIQNESNE  
PNENTGLINSEAHPEDEDEEGETDLEDFSNMIIAILKPVITITMFLVWAVRSINAKNNILGQYVGGGSMG  
MLVYNESDDSTGQKIWGSLLNGLVFLVIVLTTVAFLVLLKYRCLKAIYAWLFLSVGILLASMGSYVFM  
AMLEANNLALDYITFAFIMFNFSVGGIIAVFWYAPVLMNQGYLVLISTLMAISISRLPDWTTWVILSVIS  
IYDLFAVLCPRGPKVLVETAQERNETIPALIYNANFEPSPRPESIPKPPQQQQQQSASSSSSQARSR  
RNNNNGGEDQQEDEFQQQQQQEDDAQVDVNNNDEEVPIEELPEPEQEKRSCLKLGLGDFVFYSVLMGRAA  
MFDISTVFTCFVAIITGLFATLFLLLAIFRKALPALPISIAFGILFYFLTRIFLYPFIETMGLVEVFI

>XP\_005841632.1 hypothetical protein GUITHDRAFT\_159148 [Guillardia theta  
CCMP2712]  
MAILVFTVIFFFLYKYRCMKILYGWLGLSVAMLLGFSGGALSYSLIISLSKTQAGWFPSIDVYSFMFLQT  
NFAAMGVLVFWKSPLIVKQVYLI IASCIMAWVLSRYFPDWTWALLFGLSVYDIFAVLSPCGPLKALVE  
LSQDRGDAIPGLVYEAAPPEKRAGRSRQERVKLGGLGDFVFYSVLIGRAAIFDFTTVVTCFLAILTGLILT  
LFCLAVFRKALPALPFSIFLGIATFLVSKAVLIPFLQPLQMQQVLL

>XP\_005788433.1 hypothetical protein EMIHUDRAFT\_467266 [Emilianiahuxleyi  
CCMP1516]  
MQNIELGESSVDVERAAPSQQPASSADSRALSSQPLSDVAGSSGGGAGSSGGAGAGGECDDGGDGDGEYE  
LDPAQVASLLAPVCATMAIVVYLLKTVDAAEQPASGFSEIMVYQEHSSDDAATIAGGVALNALAMVALL  
FVAIIAYNLTKLPEWTTWGVLGAVALWDIVAVLTPRGPLKVLVETAEQRNEPI PGLVYEGHGIKLGLGDF  
VFYSLLVGRACLSSITAFACAIAVLAGLGCATLALLPVLERVL PALPISVAVGILFYFISSSLIEPLAAF  
AADQSLFL

>XP\_005790756.1 hypothetical protein EMIHUDRAFT\_454700 [Emilianiahuxleyi  
CCMP1516]  
MAGKASAAVFHFTGPIPLGSFTWASPGTRFPNRVCSNTPYATLGCASAAVRSLLAPVCATMAIVVYL  
LKTVDAAEQPASGFSEIMVYQEHSSDDAATIAGGVALNALAMVALLFVVTSGRVAIIAYNLTKLPEWTTW  
GVLGAVALWDIVAVLTPRGPLKVLVETAEQRDEPI PGLVYEGHGIKLGLGDFVFYSLLVGRACLSSITAF  
ACAIAVLAGLGCATLALLPVLERVL PALPISVAVGILFYFISSSLIEPLAAFAADQSLFL

>KOO22168.1 presenilin family protein [Chrysochromulina sp. CCMP291]  
MTADATAEASQPPDPYKQRPTEVEEFGDPAQVLSLLKPV SITMALVVFLVHEMSAASQGIAGGFSELM

VYQESATDSPGTILGGVVLNALVVVFTLFLVTSGLLLLLYKCHCYRIIYAWLFFSVSTLLFIFGGYVLREL  
LFMHDVPMDSPTFFVCMYNFAAVGTLLVFWTEYGCPTPLQLQAYLIISALLAWSATRLPEWSTWGL  
LGAVALWDLYAVLAPRGPLKMLVEEAERRGDPIPLGLVYQGNDIKLGDFVYFVSVLVGRASMSSAALLA  
CAVAIIAGLCATLALLPILQKVLPALPISIAGGIGVYFLTSATLAPMASEAALSHVFL  
>NP\_001071096.1 gamma-secretase subunit APH-1A isoform 1 [Homo sapiens]  
MGAAVFFGCTFVAFGPAFALFLITVAGDPLRVIIILVAGAFFWLVSLLLASVWVWFILVHVTDRSDARLQYG  
LLIFGAAVSVLLQEVFRFAYYKLLKKADEGLASLSEDRSPISIRQMAYVSGLSFGIISGVFVSVINILAD  
ALGPGVVGIHGDSPIYFLTSAFLTAAILLHTFWGVVFFDACERRRYWALGLVVGSHLLTSGLTFLNPWY  
EASLLPIYAVTVSMGLWAFITAGGSLRSIQRSLLCRRQEDSRVMVYSALRIPPED

>NP\_666246.1 gamma-secretase subunit APH-1A isoform 2 [Mus musculus]  
MGAAVFFGCTFVAFGPAFSLFLITVAGDPLRVIIILVAGAFFWLVSLLLASVWVWFILVHVTDRSDARLQYG  
LLIFGAAVSVLLQEVFRFAYYKLLKKADEGLASLSEDRSPISIRQMAYVSGLSFGIISGVFVSVINILAD  
ALGPGVVGIHGDSPIYFLTSAFLTAAILLHTFWGVVFFDACERRRYWALGLVVGSHLLTSGLTFLNPWY  
EASLLPIYAVTVSMGLWAFITAGGSLRSIQRSLLCRRQEDSRVMVYSALRIPPED

>NP\_001029842.1 gamma-secretase subunit APH-1A [Bos taurus]  
MGAAVFFGCTFVAFGPAFALFLITVAGDPLRVIIILVAGAFFWLVSLLLASVWVWFILVHVTDRSDARLQYG  
LLIFGAAVSVLLQEVFRFAYYKLLKKADEGLASLSEDRSPISIRQMAYVSGLSFGIISGVFVSVINILAD  
ALGPGVVGIHGDSPIYFLTSAFLTAAILLHTFWGVVFFDACERRRYWALGLVVGSHLLTSGLTFLNPWY  
EASLLPIYAVTISMGLWAFITAGGSFRSIQRSLSCKD

>XP\_003228723.1 PREDICTED: gamma-secretase subunit APH-1A [Anolis  
carolinensis]  
MGAAVFFGCTFIAFGPALALCLLTVAGDPLRVIIILVAGAFFWLVSLLLASLIWFISVHLSREDGRLQHG  
LLMFGAAISVLLQEAFRFAYFKLLKKADEGLVTSISEDRSPISIQMAYVSGLSFGIISGVFVSVINILAD  
SIGPGTVGIHGDSPHYFITSAFLTMAIVLLHTFWGTIFFDACEKRCYWKALVAVASHLMTSGLTFLNPCI  
EASLIPIFMITLSTGVWAFFTAGGSFRILSCLSCRKEENHVMVYSALQLPEN

>NP\_001089056.1 aph-1 homolog A, gamma secretase subunit L homeolog [Xenopus  
laevis]  
MALAVFFGCTFVAFGPAFSLFILTIADPLKVIILVAGSFFWLVSVLLSLLIWFISVQISNKNDANLQYG  
LLIFGAAVSVLLQETFRYAYYRLLKKADEGLATISEDRSPISIQMAYVSGFSFGIISGVFVSVINILAD  
AIGPGTVGVHGDSPYYFLTSAFLTMAIVFLHTFWGIVFFAACEKRRPLHIVGVVLSHLVTSGLTFLNPMY  
EASLIPIYIITLGMALWAFVAAGGNRYRNIRKCLACAR

>XP\_018086940.1 PREDICTED: gamma-secretase subunit APH-1A-like isoform X1  
[Xenopus laevis]  
MALAVFFGCTFVAFGPAFSLFILTIADPLKVIILVAGSFFWLVSVLLSLLIWFISVQISNKNDANLQYG  
LLIFGAAISVLLQETFRYAYYRLLKKADEGLATISEDRSPISIQMAYVSGFSFGIISGVFVSVINILAD  
AIGPGIVGVHGDSPYYFLTSAFLTMAIVFLHTFWGIVFFAACEKRKPLHIVGVVLSHLVTSGLTFLNPMY  
EASLIPIYIITLGMALWAFVAAGGNRYRNIRKCLACRRQESNQVMVYSALQVPAED

>XP\_009428545.1 PREDICTED: gamma-secretase subunit APH-1A isoform X2 [Pan  
troglodytes]  
MIATTFPHKVTKGNSDGSATEPWNWCLDWSIPGPPPLTGSSHSQDEVKASEGDYNSQQEVFRFAYYKLLK  
KADEGLASLSEDRSPISIRQMAYVSGLSFGIISGVFVSVINILADALGPGVVGIHGDSPIYFLTSAFLTA  
AIIILLHTFWGVVFFDACERRRYWALGLVVGSHLLTSGLTFLNPWY EASLLPIYAVTVSMGLWAFITAGGS  
LRSIQRSLLCRRQEDSRVMVYSALRIPPED

>XP\_003969662.1 PREDICTED: gamma-secretase subunit Aph-1b [Takifugu rubripes]  
MTAAVFFGCTFIAFGPAISLVFVTIAREPLRVIFLIAGAFFWLVSLLLSSLVWFISVQISNKESASQKQK  
LLIFGVVLSVLLQETFRFGYKLLKANEGLLTLSEETMPISIRQLAYVSGLGFGFMGAFVSVNINILAD  
SVGPGTVGIHGDSQYYFLSSAFMTMAIILLHMFVGVVFFDACEKQRWWAVAVVISHLAVSCLTFQNPAY

VNSLVPTYVILLVMGIWAFYTAGGSLRNLKLCITCKDKDFLLANHRSR

>NP\_001025300.1 gamma-secretase subunit APH-1A [Danio rerio]  
MTLAVFFGCAFIAGPAPAFALFVFTVAKDPLRVIIILIAGAFFWLLSLLLSSLVWFIAVKASNSQDPSLPRG  
LLIFGVFFSVLLQEAFRFAYYRLLRKATEGLAAISDDASSAISVRQMAYVAGLGFGVMRGAFSMINILSD  
SLGPGTVGIFGDSQYYFITAAALMTLALTLHTFWGVLFEGCEKSSWWVIAVVVSLHLLVAGLSLLNPLY  
EGSLPPVYCITLLMGIWAFFSSGGSLQNLALCTRKRKVEAESS

>XP\_014349599.1 PREDICTED: gamma-secretase subunit APH-1A [Latimeria  
chalumnae]  
MGAAVFFGCTFIAFGPAPAFSLFVITVAGDPLRVIIILVAGAFFWLVSLLLSSLIWFISVQLSNPENSSLOYG  
LLIFGAAVSVLLQEAFRFAYYRLLKKADEGLAAISEDGKSPISIQQMAYVSGLSFGIISGAFSLINILAD  
SIGPGTVGIHGDSPHYFITSAFLTMALVFLHIFWGVIVFNACETQRYWALGTVVSHMITSGLTFLNPWY  
AGSLIPISMLTVSTGIWAFFTAGGSLQNLHRCATCKADMDSQVLVYSALQTPADD

>XP\_005987783.1 PREDICTED: gamma-secretase subunit APH-1B [Latimeria  
chalumnae]  
MTAAVFFGCTFIAFGPALSFLFIFTIAKDPLKVIIFLIAGAFFWLVSLLLSSLVWFIAVQISDQSNVSVQRG  
LLIFGVVFSVLLQEAFRFAYYKLLKKADEGLMTLSQEDTMLISIQQLAYVSGLGFGIMSGAFSVVNILAD  
SAGPGTVGIHGDSPHYFLSSAFMTLAVILLHMFVGIVFFDACEKSKKWWALTAVVLSHLVVSGLTFLNPQY  
EGSLVPAYIIMFVMGTWAFFTVGGSFRLKLCMLCRDKDFLLANHRPR

>XP\_006002709.2 PREDICTED: gamma-secretase subunit Aph-1b-like [Latimeria  
chalumnae]  
MLYDDAAGYRKSLARWLRDRGVEGAAGRAGREDPGPPGELRLQARAEEFGPRVTVALLRPERESPGLSGGP  
GAAGSPRVFPGFLPSRPRLRSDRGFVALVAVGVNDRQAAMTLAVFFGCMCIAFGPAAALFVFTVARDPL  
RVILFIAAAFFWLLSLLLSSLVWFIAVKASDARDQLQKGLLIFGVVFSVLLQELFRLAYYKLLRKAMDG  
LVALSEEGQSPVSIQOMAYVTGLGFGIISGTFSMINILADSLGPGTVGIHGDSQYYFITSAFMTLVVILL  
NTFWGVVFFHGCERQQWDDVLTVVATHLLVSGLTFLNPLYEGSLIPAYLIMLLMGTWAYFLSGGSVRNLQ  
RFLRCKKRSERSPTSS

>XP\_002607668.1 hypothetical protein BRAFLDRAFT\_123275 [Branchiostoma  
floridae]  
MTVKEFFGCTFIAYGPAFALFIFTIAREPLRIIILIAGCFFWLLSLLFSSVLWNIVWPLKDQLAFGVVFS  
VLFQEIFRFFIYKLLRKADEGLQTFSDPEPTASDKHTIAYVAGLGFGMSGAFSLVNLAMATGPGTVGI  
HGDTPIYFFLTSALMTSCFILLHTFWNVIFFWGCDKRNFPVAVGFVVGFMHLISCLTLIRPLQPATIIIPAYC  
ILLVTMAIAYKLVGGSVNNLMAFLTCKRAGYASN

>XP\_002736656.1 PREDICTED: gamma-secretase subunit Aph-1b-like [Saccoglossus  
kowalevskii]  
MTTMSLFGATFIAFGPLIAMFIFTIVKDPLKVIIMIAGSFFWLLSLLLSSLLWVIVSPLQDELAFVIFVS  
VIFQELFRLAYYKLLRKADEGLQFTDQDQDVISKNTGYVAGVGFALMSSTMSTVNILADHSGPGTVGI  
NGDDELFLLSAFTCCFTLLHTFWGVIFFYGMKDKKYLMLVGVVSHLAVSCLTLLNQYDPPMYMASLI  
PSYVIMVLMGTWAYVYVAGGSFQNVLAFFTCCKHGGYDFD

>XP\_783542.1 PREDICTED: gamma-secretase subunit Aph-1-like  
[Strongylocentrotus purpuratus]  
MTLLQLFGSMFIAYGPAFSLFIFTISREPLRIIVMMAGMFFWLCSLLTSSVLWFAVWPLKGQISFGLTFS  
ILFQELFRFIYKILRKAEDGLQQFNQTTPEQAQQQAQNSNGDSTSDKTRHGAYAVAGLGFGTMSGIFSF  
INVLADSKGPGTVGIHGDPHDFLITSALFTSCFILLHIMWNVIFYWGFETRTRYWAVLIVVASHFLVSELT  
LLNKSQLYSITLPVAYVTLAVMTLFAFFIAGGSSRGIKQAFSLNRSRYAL

>NP\_492469.1 Gamma-secretase subunit aph-1 [Caenorhabditis elegans]  
MGYLLTIACYIASFSPSIALFCSFIAHDPVRIILFFLGSSFFWLVSLLFSSSLAWLGLSTVLPDFTLLSLTV  
CIIAQELSRVAYFMLLKAQRGLNKITRQGQISVAPGVSDLHNARHMLALVCGLGMGVISALFYTMNAFA

IFSGPGTIGLPNALKTGEIDTNRAGKYLPLCYTLSAILLTLFHVTWTIMVWDSCHKIGRIPSAFVPGAAA  
VVSHLLVTFLLSSLNRSRGFHVLFVAVQFLILLICIAVCNVMGGTISSSFVNGIGQSITDAVTLKQVRTLIE  
ERKLRTQRQSVDPDEPMTERRAGTSNTVNA

>NP\_608710.1 anterior pharynx defective 1, isoform A [Drosophila  
melanogaster]

MTLPEFFFGCTFIAFGPPFALFVFTIANDPVRIIILIAAAFFWLLSLLISSLWYALIPLKEFLAFGVVFSV  
CFQEAFRYIIYRILRSTEQGLHAVAEDTRVTDNKHILAYVSGLGFGIISGMFALVNVLADMSGPGTMGLK  
GGTELFVFTSAAQALSIIILLHTFWSVIFFNADFDTNNYIHIGYVVFVSHLFLVSLITLLNANELYTTTTLLINY  
LVTILTGVLAFRVAGGTSRSFRKFITCQ

>XP\_002167184.1 PREDICTED: gamma-secretase subunit Aph-1-like [Hydra  
vulgaris]

MTLESFFGCAVFAFGPALSMAITVFNDAAQQVVLVLISSAFFWLLSLLVSAMWWQLFNFTILKNYLVSFMI  
FSVIFQEMFRLFLWMVLRRAEEGLIVMNGSYTPLRKIRFHVYVSGLGGLMSGLFAMVNILADITGPGTVG  
LFGDNNHFVIVSAFLTNCVLLHTCWGILFFDAMDAAKKWKTVLFVCTSHLAISLLTLLNKHYTYWPSLIT  
GYILLVVMGIWSFRVVGSSNNLTQLFKKKDSS

>XP\_003382482.1 PREDICTED: gamma-secretase subunit Aph-1b-like [Amphimedon  
queenslandica]

MTVLTAFAYGIYTFGPPVALFFVTVARHPHEIITMILGAFFWLLALLFASLVWIIVIPLKDTPAFTLPIS  
VILQEVFRWLYFKLLKKADHLLLEIVSEDKSDLRKHKIAYVGGGLGFLIAGIVMFANVLSVASGPGTVRSN  
QYFVTVSAFSTQVMIILHICWGVIFFAGLESKNWLYIFAVPISHMFISCLSLINLANTPAYFLSFGYFL  
CVVFFVALAFFAAGARPKTLVDFFKR

>XP\_647460.1 gamma-secretase subunit Aph-1 [Dictyostelium discoideum AX4]

MTQVLFGCLFITFSPILAFFFMVIAKNSQLVILTIGGSFFWLVSILIAAIWYIIPPMREHWWFIIISFS  
VLFQEIFRYIFFRLYSYGFNDRPNSLNQIKETQHQMALDSMRKRKQAQQQKQPPTNEIESINNEIIDTTN  
NNTNNNNNNNNNNINDDDNKEITEEEKEKRKIEKQKQREIEINARLETLSARPNTLSSAAIGVSGVAYG  
FIMFGSILWESTGPGTLFSPACPSVNLFMLSSIIITLFMTLLHVYVNVLAFQGYRSKKYHLVAFVIIITHFV  
TTYLTLNLPKTTSCVGSILPIGIITVFSVGFICIFSLKSDSITKIH

>XP\_001693775.1 gamma-secretase accessory subunit [Chlamydomonas reinhardtii]

MPIDFFGLFLLGLGPGIAFFIVLIARKSFLVLLALFSAFLWLVLLFISAFRAVPLSPTIGPYTGMLA  
ASVFIEEAVRYGTWWLHRVTLNLDGMARASGHRFGLLDKLYMAVAVWGYGHGACHAVFFFLSLLPLTTGD  
GTLYVAECPQMSVFLVVALYSLAFGMILTSLTVIAFDGYMNKNYLVVAVALLLHWGAFLTLNLFQRDGC  
VVSMPVLVALGLLLLTGYTVALCWWKQVAR

>XP\_004365170.1 hypothetical protein CAOG\_00299 [Capsaspora owczaraki ATCC  
30864]

MSFMVLLGIALIAFSPVLVLLTVAQSAELVLLVCSAFFWLLSILVTSILWFIISPIRDAYVWAIFLA  
VALQEVGRWATYRVLKRAEPGLLKVADFANSRLVHRLAYVSGLGFGIMSALIQFNPVLSVATGPGMLPS  
PGCTGNSYYLVSAFTICFSLHVFVWHVVFVSHGMNTNSKVLVAIVPIAHLAASLLTLINESGESGAGALV  
PLYIELALFGFICWRIISKRPSREF

>XP\_008879360.1 hypothetical protein H310\_13585 [Aphanomyces invadans]

MVQWALFWGCMLTGFAVPSFLFLTVVAQRAQLVILSITAFAFFYLLGLLVAATLWSVIPPLHDSIHATIPV  
AILVQELFRYAFFVVYIRCEQAVKRVTTKQNQLPLNDLTSSFASGVGFALMRALMLYGTVLAASSMAGEGA  
AFTATCPQIPLVFASALSTLALTLMDIALMILAFEGYRKRRSATHIVAVVLLHLGSGLSNMLNLNEVGCTA  
SIPLTYVAALLAIFAATVSVKRSSPSFAS

>XP\_009492849.1 hypothetical protein H696\_00694 [Fonticula alba]

MGAMTFVGCLLTAYSAPAYLTWRHILPQSLRVILMMTGMIYLLGVFLASLFWFAVVPLRQNLWFSIPFS  
VGFQFLARYAYYRLYMRIINGINAIISDNPANKWNGLDYAFVGGHGFGLMSALVMNAAALAESLGPFAVPC  
ASCPSLSSFFVYAILALYFWYIHLMMPLCMNAFSRQPPRAIFRVATLYLTQTGASYATNLFHNAPGLV  
AGVGNNGPCSIAFLVMIAIAVGLSFEAWRVLDLATMR

>OON06716.1 hypothetical protein BSLG\_03664 [Batrachochytrium salamandrivorans]  
MTLLSFFGNLFTAYGPALMVMLLLYLGPSARLMMMSLSSGFIWLLSILIIAIIAHFLPDLSSNSPQMVMVMS  
SVIQELGRVAIFYMFKFDADPVLVSIASDPTTKFNRVHHAHAAGFGIGMMSGIVSYITPLTESASPGIMNC  
NSCPGADVFFIGAITTSLFIFLHISWTVVAFDGDWFKGNWFQFVWVLASHIGASMATLWIIPSSSTSGGCVYS  
ILVSLAILASNGGYSFVWVQSKIKTKQS

>CBN76993.1 conserved unknown protein [Ectocarpus siliculosus]  
MGLVLVAGCSLIAFGPSIMLWVVVVGKRPALVIGLVGAFFWLASMAAASVLWTIVPAAQDAWLLSMITG  
VVLHGFGRLLALAKVYVKTEAVINEAAAAHAAPASNAHGSSGRYGGALGAEGSGGVGEGRGERKTTGDVDPQP  
EESSGLLRNLNGVSSSIAAGVWGGLIHAVIMVGTALSKHMGPGAAPSPSCPHVPSVIVSALSQAQAFVVLDDL  
LLMAAAFAAARS GDAGLMSFSFGLHFAAALTTGFNFIEGGCTASLPLLYGVVALAAIALTRYRPLKSAMI  
RLRR

>XP\_005832892.1 hypothetical protein GUITHDRAFT\_152603 [Guillardia theta  
CCMP2712]  
MKAVMIAACAAAMGLVVAVSMIWMSSQSSSAVALEVNMPENHPPLFDHTFWGVGNEDRIERRANWALRAI  
GKMNGTLIEAMIANGTIASESEAI DPALIAEIHQAQHEQDMESDINAPAPERFPFEQDTPAAEEGTEAEG  
SEEGAEGEGEGATEEGAEGASEGAEGEGATEETTTEEGGESAAVGPDTTEESAQ

>XP\_002181033.1 predicted protein [Phaeodactylum tricorutum CCAP 1055/1]  
MTEVSLTIGSALLAFGPFLSLFGLLVYQKAQLVIVVTTAAFFFLAAVTASLAWTIFHAIGLGGPLAALV  
PGVFFQFAFRCGFVALYHNVEQVIQNSMEKSDQRRRDVAHPEQGINSTDAPNARIEQNITQESDQWTEAT  
KLRLQLNDASCGVAAGVGFVGMHVIMLYGTLWASQVGDSEGVLYQDACPQVPSLALS AVYAFLFSILDVF  
WMLFTFFGMRRRRMFHRGAQGEDEYVSVGAWFGNSRTGGNFALLLCLVTHSFAAVFTTADYFNHGCLISI  
PLTSGMVVFTAYLFWAGVGRIYMPPSQIAMVHGEAPAVSFHED

>XP\_020437801.1 gamma-secretase subunit Aph-1 [Polysphondylium pallidum  
PN500]  
MTALLFYGCLFVAFSPSIVFFTMVISRNSQLVIMAIAGTGS GITYGFVMYGTILWEAQGPGNLFSPACP  
TVSLFILSAIYALCFSL LHIAWNITAFQGYRTKNYFNVGVVLLSHFAASYFIEAAMVPTVIGYTFRTMIK  
GDSITKIT

>EPZ35700.1 hypothetical protein O9G\_004357 [Rozella allomycis CSF55]  
MRSKSSSTASTLVVSKPLFMDYKQKLEAVEQKIEALLDDHKLLELKKKKKKRQLDEDGEAELEQLLEKVA  
ELKDSAKRWFELVKITTKKDAKMEETITFGDATAEQIQAVTGVKFP IQDLDEFPSYEDVVP SDDFMAQY  
FKNRQVWCINSEASQRTYIDLFLRDVVARLEFQQLKIFCELSMGVSNEQGSKKIKLSGRCDYTI GHTRP  
TALDFGSHPNDIHLLTVEAKEAWINKDCLQ CIAEMATVYKSRKDAGKENCTVWGIW TNAYSWQFFLIDND  
GQVYRTVMYVLQKDDDIKKIYRFVYHCVKQAYNASPTESCAPTIV

>EMS12153.1 hypothetical protein KM1\_238650 [Entamoeba histolytica HM-3:IMSS]  
MLFCLASIFVASGVSLIFLIYFAMKNSQQLIASIAGSISWLI ALSIIISLVWLVL PFSHQHYVLI IYSFII  
TEVIRFTTLIGIHYFTKFKFDEIKLVGFGGLGVGAAVCQVLIHNV PYLLLSTGDADLYLLNPIIGNFTV VAF  
NGFCYSVYLICSYTSLSLLLHRNKDIIYSIIFVSLHGAILVAGIMNYYVSVYLGITLMLLLIDIITVIMT  
FIILYHYRH

>XP\_005772054.1 hypothetical protein EMIHU DRAFT\_436113 [Emiliana huxleyi  
CCMP1516]  
MPALLAAAVWAAAFSPA AVL FATVVARPVLVVLVFLSAFAWLLSISLAAALAAALRAAVPAAGTSVAVV  
AAAAALCQEGSRYGMYSAYVFLRSLRQLGVAVDTGPPAAHLLSAAVANGVGIWAAYTLVLYGDVLRSS  
LPGSLYSDQCEGLSTFAVDAMSACGIGLVNVL LSCIGWVAAYPRRSPALAATTVGLHVAATAATALNAGP  
RGLAKDGCASL PALGGAVLLSAVAFAFSTRDGGAAAARDLGLCSGVVRFKEKDEPLLSSQSRAHRSSAP  
LDEPPPEETTRQRLNRPSAAASGD

>NP\_112591.2 gamma-secretase subunit APH-1B isoform 1 [Homo sapiens]  
MTAAVFFGCAFI AF GPALALYVFTIATEPLRIIFLIAGAFFWLVSLLISSLVWFMARV I IDNKDGPTQKY  
LLIFGAFVSVYIQEMFRFAYYKLLKKASEGLKSINPGETAPSMRLLAYVSGLGFGIMSGVFSFVNTLSDS

LGPPTVGIHGDSPOFFLYSAFMTLVIILLHVFWGIVFFDGDCEKKNKWGILLIVLLTHLLVSAQTFISSYYG  
INLASAFIILVLMGTWAFLAAGGSCRSLKLCCLLQDKNFLLYNQRSR

>NP\_808251.1 gamma-secretase subunit APH-1B [Mus musculus]  
MTAAVFFGCAFIAFGPALALYVFTIATDPLRVIFLIAGAFFWLVSLLLSSVFWFLVRVITDNRDGPVQNY  
LLIFGVLLSVCIQELFRLAYYKLLKKASEGLKSINPEETAPSMRLLAYVSGLGFGIMSGVFSFVNTLSNS  
LGPPTVGIHGDSPOFFLNSAFMTLVVIMLHVFWGVVFFDGDCEKNKWYTLTLLVLLTHLVVSTQTFLSPYYE  
VNLVTAYIIMVLMGIWAFYVAGGSCRSLKLCCLLQDKDFLLYNQRSR

>NP\_080950.1 putative gamma-secretase subunit APH-1C [Mus musculus]  
MTLPVFFGCAFIAFGPAFALYLFTIATDPLRVIFLIAGAFFWLVSLLLSSMFVFLVRVITNNRDESVQNY  
LLIFGALLSVCIQELFRLAYYKLLKKASEGLKSINPEEDIAPSMRLLAYVSGLGFGIMSGVFSFVNTLSN  
SLGPGTVGIHGDSPOFFLNSAFMTLVVIMLHVFWGVVFFDGDCEKNKWYTLTLLVLLTHLVVSTQTFLSPYY  
EVNLVTAYIIMVLMGIWAFYVAGGSCRSLKFCCLLQDKDFLLYNQRSR

>NP\_001178332.1 gamma-secretase subunit APH-1B [Bos taurus]  
MTAAVFFGCAFIAFGPALALYIFTIVTEPLRIIFLIIGAFFWLVSLLFSSLIWFTTATLIGNKDEPREKY  
LLIFGVLSVLIQEMFRFAYYKLLKKASEGLKTINPYEKAPSMRLLAYAFMTLVITLLHVFWGIVFFDGC  
EKKKWYTLVLLSHLLVSALTISPHEGLNLVLAYIIMVLMGVWAFFVSGGSCRSLKLCCLLQDKDFLL  
FNQRAR

>NP\_956409.1 gamma-secretase subunit Aph-1b [Danio rerio]  
MTVAVFFGCTFIAFGPAIALFMFTIARDPLRVIFLIAGAFFWLVSLLLSSLVWFITVQISNKNSATQQRG  
LLIFGVVLSVLLQEAFFRYGYRLLKKANEGLLALSQEDTMPISMRQLAYVSGLGFGFMGAFSVVNILSD  
SLGPGTVGIHGDSQHYFISSAFMTLAIILLHMFVGVVFFEACERQRWWALGAVVASHLVVSVCLTFVNPY  
QGS LIPTYIILSVMAVWAYLCAGGSLRNKLCCLTCKDKDFLLANHRPR

>NP\_001029842.1 gamma-secretase subunit APH-1A [Bos taurus]  
MGAAVFFGCTFVAFGPALFLITVAGDPLRVIIIVAGAFFWLVSLLLASVVWFILVHVITDRSDARLQYG  
LLIFGAAVSVLLQEVFRFAYYKLLKKADEGLASLSEDGRSPISIRQMAYVSGLSFGIISGVFSVINILAD  
ALGPGVVG IHGDS PYYFLTSAFLTAAILLHTFWGVVFFDACERRRYWALGLVVGSHLLTSGLTFLNPWY  
EASLLPIYAVTISMGLWAFITAGGSFRSIQRSLSCKD

>XP\_008123904.1 PREDICTED: gamma-secretase subunit Aph-1b-like [Anolis  
carolinensis]  
MMHGLVLDPPSQCFCPAVAGLGFGLMSGAFSMINLLADSLGPGTVGIYGDSQLYFLTSAFMTLVLLILLHT  
FWGIIFFHGCETRRWWEVAAVVISHLIVSCLVSCHEHRTRWSLPLL

>NP\_112591.2 gamma-secretase subunit APH-1B isoform 1 [Homo sapiens]  
MTAAVFFGCAFIAFGPALALYVFTIATEPLRIIFLIAGAFFWLVSLLISSLVWFMARVIIDNKDGPTQKY  
LLIFGAFVSVYIQEMFRFAYYKLLKKASEGLKSINPGETAPSMRLLAYVSGLGFGIMSGVFSFVNTLSDS  
LGPPTVGIHGDSPOFFLYSAFMTLVIILLHVFWGIVFFDGDCEKKNKWGILLIVLLTHLLVSAQTFISSYYG  
INLASAFIILVLMGTWAFLAAGGSCRSLKLCCLLQDKNFLLYNQRSR

>NP\_808251.1 gamma-secretase subunit APH-1B [Mus musculus]  
MTAAVFFGCAFIAFGPALALYVFTIATDPLRVIFLIAGAFFWLVSLLLSSVFWFLVRVITDNRDGPVQNY  
LLIFGVLLSVCIQELFRLAYYKLLKKASEGLKSINPEETAPSMRLLAYVSGLGFGIMSGVFSFVNTLSNS  
LGPPTVGIHGDSPOFFLNSAFMTLVVIMLHVFWGVVFFDGDCEKNKWYTLTLLVLLTHLVVSTQTFLSPYYE  
VNLVTAYIIMVLMGIWAFYVAGGSCRSLKLCCLLQDKDFLLYNQRSR

>NP\_080950.1 putative gamma-secretase subunit APH-1C [Mus musculus]  
MTLPVFFGCAFIAFGPAFALYLFTIATDPLRVIFLIAGAFFWLVSLLLSSMFVFLVRVITNNRDESVQNY  
LLIFGALLSVCIQELFRLAYYKLLKKASEGLKSINPEEDIAPSMRLLAYVSGLGFGIMSGVFSFVNTLSN  
SLGPGTVGIHGDSPOFFLNSAFMTLVVIMLHVFWGVVFFDGDCEKNKWYTLTLLVLLTHLVVSTQTFLSPYY  
EVNLVTAYIIMVLMGIWAFYVAGGSCRSLKFCCLLQDKDFLLYNQRSR

>XP\_003969662.1 PREDICTED: gamma-secretase subunit Aph-1b [Takifugu rubripes]  
MTAAVFFGCTFIAFGPAISLVFVFTIAREPLRVIFLIAGAFFWLVSLLLSSLVWFISVQISNKESASQQKG  
LLIFGVVLSVVLQETFRFGYYKLLKKANEGLLTLTSLQEETMPISIRQLAYVSGLGFGFMGAFSVVNILAD  
SVGPGTVGIHGDSQYYFLSSAFMTMAIILLHMFVGVVFFDACEKQRWWAVA AVVISHLAVSCLTFQNPAY  
VNSLVPTYVILLVMGIWAFYTAGGSLRNLKLCITCKDKDFLLANHRSR

>NP\_001178332.1 gamma-secretase subunit APH-1B [Bos taurus]  
MTAAVFFGCAFIAGFPALALYIFTIVTEPLRIIFLIIGAFFWLVSLLFSSLIWFTTATLIGNKDEPREKY  
LLIFGVVISVLIQEMFRFAYYKLLKKASEGLKTINPYEKAPSMRLLAYAFMTLVITLLHVFWGIVFFDGC  
EKKKWYTLVLLSHLLVSALT LISPHYGLNLVLAYIIMVLMGVWAFFVSGGSCRSLKLCLLCQDKDFLL  
FNQRAR

>NP\_956409.1 gamma-secretase subunit Aph-1b [Danio rerio]  
MTVAVFFGCTFIAFGPAIALFMFTIARDPLRVIFLIAGAFFWLVSLLLSSLVWFITVQISNKNSATQQRG  
LLIFGVVLSVLLQEAFFRYGYRLLKKANEGLLALSQEDTMPISMRQLAYVSGLGFGFMGAFSVVNILSD  
SLGPGTVGIHGESQHYFISSAFMTLAIILLHMFVGVVFFEACERQRWWALGAVVASHLVVSCSLTFVNPY  
QGS LIPTYIILSVMAVWAYLCAGGSLRNLKLCITCKDKDFLLANHRPR

>NP\_001029842.1 gamma-secretase subunit APH-1A [Bos taurus]  
MGAAVFFGCTFVAFGPAFALFLITVAGDPLRVIIIVAGAFFWLVSLLLASVWVFIHVHTDRSDARLQYG  
LLIFGAAVSVLLQEVFRFAYYKLLKKADEGLASLSEDRSPISIRQMAYVSGLSFGIISGVFSVINILAD  
ALGPGVVG IHGDS PYYFLTSAFLTAAILLHTFWGVVFFDACERRRYWALGLVVGSHLLTSGLTFLNPWY  
EASLLPIYAVTISMGLWAFITAGGSFRSIQRSLSCKD

>XP\_008123904.1 PREDICTED: gamma-secretase subunit Aph-1b-like [Anolis carolinensis]  
MMHGLVLDPPSQCFCPAVAGLGFGLMSGAFSMINLLADSLGPGTVGIYGDSQLYFLTSAFMTLVLLILLHT  
FWGIIFFHGCETRRWWEVA AVVISHLIVSCLVSCHEHRTRWSLPLL

>NP\_001277113.1 nicastrin isoform 2 [Homo sapiens]  
MDFNLILESLCRGNSVERKIYIPLNKTAPCVRLLNATHQIGCQSSISGDTGVIHVVEKEEDLQWVLTGDP  
NPPYMVLLSKHFTRDLMEKLGKRTSRIAGLAVSLTKPSPASGFSPSVQCPNDGFGVYSNSYGPFAHCR  
EIQWNSLGNGLAYEDFSFPIFLLEDENETKVIKQCYQDHNLSQNGSAPTFPLCAMQLFSHMHAVI STATC  
MRRSSIQSTFSINPEIVCDPLSDYNVWSMLKPINTTGTLKPDDR VVVAATRLDSRSFFWNVAPGAESAVA  
SFVTQLAAAEALQKAPDVTTLP RNVMFVFFQGETFDYIGSSRMVYDMEKGFVPVQLENVDSFVELGQVAL  
RTSLELWMHTDPVSQKNESVRNQVEDLLATLEKSGAGVP AVILRRPNQSQPLPPSSLQRFLRARNISGVV  
LADHSGAFHNKYYQSIYDTAENINVSYPEWLSPEEDLN FVTD TAKALADVATVLGRALYELAGGTNFSDT  
VQADPQTVTRLLYGFLIKANNSWFQSILRQDLRSYLG DGPLQHYIAVSSPTNTTYVVQYALANLTGTVVN  
LTREQCQDPSKVPSENKDLYEYSWVQGPLHSNETDRLPRCVRSTARLARALSPAFELSQWSSTEYSTWTE  
SRWKDIRARIFLIASKELELITLTVGFGILIFSLIVTYCINAKADVLFIAPREPGAVSY

>NP\_056146.1 nicastrin isoform 1 precursor [Homo sapiens]  
MATAGGGSGADPGSRGLLRLLSFCVLLAGLCRGN SVERKIYIPLNKTAPCVRLLNATHQIGCQSSISGDT  
GVIHVVEKEEDLQWVLTGDPNPPYMVLLSKHFTRDLMEKLGKRTSRIAGLAVSLTKPSPASGFSPSVQC  
PNDGFGVYSNSYGPFAHCREIQWNSLGNGLAYEDFSFPIFLLEDENETKVIKQCYQDHNLSQNGSAPTF  
PLCAMQLFSHMHAVI STATCMRRSSIQSTFSINPEIVCDPLSDYNVWSMLKPINTTGTLKPDDR VVVAAT  
RLDSRSFFWNVAPGAESAVASFVTQLAAAEALQKAPDVTTLP RNVMFVFFQGETFDYIGSSRMVYDMEKG  
KFPVQLENVDSFVELGQVALRTSLELWMHTDPVSQKNESVRNQVEDLLATLEKSGAGVP AVILRRPNQSQ  
PLPPSSLQRFLRARNISGVVLADHSGAFHNKYYQSIYDTAENINVSYPEWLSPEEDLN FVTD TAKALADV  
ATVLGRALYELAGGTNFSDTVQADPQTVTRLLYGFLIKANNSWFQSILRQDLRSYLG DGPLQHYIAVSSP  
TNTTYVVQYALANLTGTVVNLTREQCQDPSKVPSENKDLYEYSWVQGPLHSNETDRLPRCVRSTARLARA  
LSPAFELSQWSSTEYSTWTESRWKDIRARIFLIASKELELITLTVGFGILIFSLIVTYCINAKADVLFIA  
PREPGAVSY

>XP\_513923.2 PREDICTED: nicastrin [Pan troglodytes]  
MATAGGGSVADPGSRGLLRLLSFCVLLAGLCRGN SVERKIYIPLNKTAPCVRLLNATHQIGCQSSISGDT  
GVIHVVEKEEDLQWVLTGDPNPPYMVLLSKHFTRDLMEKLGKRTSRIAGLAVSLTKPSPASGFSPSVQC

PNDGFGVYSNSYGPFAHCREIQWNSLGNGLAYEDFSFPIFLLEDENETKVIKQCYQDHNLSQNGSAPTF  
PLCAMQLFSHMHAVI STATCMRRSSIQSTFSINPEIVCDPLSDYNVWSMLKPINTTGTLKPD RRVVVAAT  
RLDSRSFFWNVAPGAESAVASFVTQLAAAEALQKAPDVTTLP RNVMFVFFQGETFDYIGSSRMVYDMEKG  
KFPVQLENVDSFVELGQVALRTSLELWMHTDPVSQKNESVRNQVEDLLATLEKSGAGVPVAVILRRTNQSQ  
PLPSSSLQRFLRARNISGVVLADHSGAFHNKYYQSIYDTAENINVSYPEWLSPEEDLN FVTD TAKALADV  
ATVLRALYELAGGTNFSDTVQADPQTVTRLLYGFLIKANNSWFQSILRQDLRSYLG DGPLQHYIAVSSP  
TNTTYVVQYALANLTGTVVNLTREQCQDPSKVPSENKDLYEYSWVQGPLHSNETDRLPRCVRSTARLARA  
LSPAFELSQWSSTEYSTWTESRWKDIRARIFLIASKELELITLTVGFGILIFSLIVTYCINAKADVL FIA  
PREPGAVSY

>NP\_067620.3 nicastrin precursor [Mus musculus]

MATTRGGSGPDPGSRGLLLLLSFSVVLGAGLCGNSVERKIYIPLNKTAPCVRLLNATHQIGCQSSISGDTG  
VIHVVEKEEDLKWVLT DGNPPYVLLLEGKLFTRDVM EKLGTT SRIAGLAVTLAKPNSTSSFSVQCP  
NDGFGIYSNSYGPFAHCKKTLWNELGNGLAYEDFSFPIFLLEDENETKVIKQCYQDHNLGQNGSAPSFP  
LCAMQLFSHMHAVI STATCMRRSFIQSTFSINPEIVCDPLSDYNVWSMLKPINTSVGLEPDVRRVVVAATR  
LDSRSFFWNVAPGAESAVASFVTQLAAAEALHKAPDVTTLSRNVMFVFFQGETFDYIGSSRMVYDMENGK  
FPVRLNIDSFVELGQVALRTSLDLWMHTDPMSQKNESVKNQVEDLLATLEKSGAGVPEVVLRRLAQSQA  
LPPSSSLQRFLRARNISGVVLADHSGSFHNRYQSIYDTAENINVTYPEWQSPEEDLN FVTD TAKALANVA  
TVLARALYELAGGTNFSSIQADPQTVTRLLYGFLVRANNSWFQSILKHDLRSYLD DRPLQHYIAVSSPT  
NTTYVVQYALANLTGKATNLTREQCQDPSKVPNESKDLYEYSWVQGPWNSNRTERLPQCVRSTVRLARAL  
SPAFELSQWSSTEYSTWAESRWKDIQARIFLIASKELEFITLIVGFSTLVFSLIVTYCINAKADVLFVAP  
REPGAVSY

>NP\_001029647.1 nicastrin precursor [Bos taurus]

MATAGGGCVADPGSRSLRLRLSFCVLLAGLCEGNSVERKIYIPLNKTAPCVRLLNATHQIGCQSSISGDT  
GVIHVVEKEEDLQWVLT DGNPPYVLLLEGTLFTRDVM EKLGKRS GRIAGLAVSLAKPSPASGFSPSVQC  
PNDGFGVYSNSYGSQFAHCRAFQWNKVG DGLAYEDFSFPIFLLEDENETNVIKQCYRDHNLSPNGSAPAF  
PLCAMQLFSHMHAVVSTVTCMRRSLIQSSFSISPEIVCDPLSDYNVWSLLKPINTSGTLEPDDR VVVAAT  
RLDSRSFFWNVAPGAESAVASFVTQLAAAEALQKAPDAATLP RNVMFVFFQGETFDYIGSSRMVYDMENG  
KFPVQLENIDSFVELGQVALRNSLELWMHTDPMSQKNETVLNQVEVLLSTLEQSGAGVPTVVLRRLNQSQ  
PLPSSSLQRFLRARNVSGVVLADHSDSFHNLYYQSIYDTAENINVTYPAGQSPEEDLN FVTD TAKALAGV  
ATVLRALYRLAGGASFN DTIQADPHTVTRLLYGFLVRANNSWFQSILRPDLRSYLG DGPLQHYIAVSSP  
TNATYVVQYALANLTGKVIDLTREQCQDPSQVPTENKDLYEYTWVQGPLNANETDRLPRCVRSTARLARA  
LSPAFELKQWGSTEYSTWTESRWKDIRARIFLIASKELEAEFGSMAELLDVAGKGLNQLSVEANLQEWRL  
KPAFSPHCWPRAQLORA

>XP\_008121550.1 PREDICTED: nicastrin [Anolis carolinensis]

MAAVEEEGGGSAGFLLKGLLLFAVAGGSVRCNSVERKIYIPLNRTATCVRLLNATHQIGCQSSLN GDTGII  
HVVEDEEVDLKWVLEEGPHAPYVLLLLDGELFTGELMQR LKGS SRI SGLAVAI AKPSPSRGFS PGLKCPND  
GFGVYNGSYGPEFAHCNVTAWNLLGNLSYQDFGFPIFLLQDQNETEVIKQCFQTYNRPRGGSAPQYPLC  
AMQLSSHMHAVTSTVTCMRRSAIQSTFSLNPEVVC DPLTDFNVWSAVKPINESDKPPPDSIVMAAARIDS  
HSFFWNVAPGAESAVGSFVTL LAAAEAIHKAPRAQALPRN ILFAFFQGETFDYIGSSRMVYDMQNGKFPI  
KLDNIHSFLEISQVALRNGSDLWMHTDPVSQRNQSLQGSIQTMLGALKNMSVGTPLSLREIGLTQPLPPS  
SFQRFLRARPIPGVVLADHQTTFHNR YFQSIYDTAENIRLQYPEGLTPEEELNHVTDVAKSLAEVSTVVA  
RSLFLLAGGSNADALAMQADPETVTRLLYGFLVKANNSWFQAIVKPEVQAYLGDEPLQY YIAVSSPVNTT  
LVVQAVLANLTGTRMNESVTKEQCQNLGRGPNADLYEYWAQGPLWPSNGSSSGKRSPWCVRSAVRLSVA  
SSPAFELQD WASQEFSTWTESRWKELHARIFL VASRQLEMVTL SMGLLILLLSFGATYFINAKADLLFGD  
AGGVAY

>NP\_001123711.2 nicastrin [Xenopus tropicalis]

MAVRTACCVRMMGEAYRGWRGLGLVVAL LAVVCGNSVERKIYIPLNSTAPCVRLLNATHQVGCQSSKNG  
DTGVIHVVEQEDDLQWVLES GPHPPYMVVLEASLLRRDTMQKLGSTRVSGIAVTF SQTGPAAGFSPDPQ  
CPNDGFGLYTSDHGPQFAHCNHTTWNPLGSGISYEDFQFPIFLLREENETEVIKQCYREHNMPQNGSAPQ  
YPLCAMQLSSFMYGVTNTVTCMRRNSLQSSFSLSAGVCDTIIVHNVWSSLKPINTTGTV PPEEQIVVAAA  
RADSHSFFWNLAPGADSTVSGFVTL LAAAEALHKRNDTQDLPRNIMFVLFQGEVYDYIGSSRMVYDMEKG  
RFPVSLGNIHSFVELNQVALRNSFLWVHTDPI SRTNETVNATVQEVVDSLVAASQGSNVTIQEVD RSQP  
LPPASLQRFLVRVNI PGVVLTDHRTAYS NRYH SVYDTADNIHMRYPEGLTKDEELKYVTD TARSLAGVA



TVLANSLYRLAGGKSTEEIKADPNTVTQMLYGFLLKMSNNSWFQSIIRDEWRNVLEATQPQYYMTGTIKST  
SREPNSPARLLLAVFANLTGAVVNLTKKEECQNPDKIDDPNKELYSYTWVQGPLDGNSTSRLLPFCVRSATH  
SHVAESPAFELDQWDSTEYSTWTESRWKEIKARIFLVPSHELEVITLVVGI AVL LVSL LTTYFINAKADI  
LFTNTQDSDVAY

>NP\_001009556.1 nicastrin precursor [Danio rerio]  
MENLISINCVQLLITALFYTCISCSSVEQKIYVELNKTAPCVRLLNATHQIGCQSSISGDTGVVHVLESE  
SDLDWILSAGPHPPYIMVIMETAFFNRSVMLSMKNSSRVAGVAVIISKAGLAEHFSPHTTCPNQNTGVYSA  
GSEFANCNGTVWNPLGNGLSYEDFTFPVFALKDENQTVIRKCYEDHNLRVNGSAPQYPLCAMQLFSHM  
AVTDTVTCMRRTDLQNKFSINPEILCDPLSDYNVWTSIRPLNNSARGHAENESVVI AAVRLDGRSFFWEE  
APAAEGTVSAIVTLLAAIHALYPVIOEAPPLRNIFFTFFQGEAFDYIGSSRMVFDMEQNQFVMDLDNVHS  
MLEIGQVGLRGRDVIHSDPVSRRNSSMEKQVSEMIKDVNSSAAGLNINLQEPSVSQPLPSSSFQRFRLR  
VRPI PGLVLT DHEKAFNNRYYESMYDDAENLNVSYPNLT PDEQLVYPTDAKSLAEVATLVARS LYTQA  
GGEQNNLSNITADATMVSQLLYGFLVQKNNSWFRSLLPPEITKKGSSILSSGPPQFYIGLGPRLQSPVH  
SVTLFVQYILANLTGNVTNLTESQCQNPKELSGENKDLYSYFWVSGPSSGNSSADPLCVRASVRLSKAVS  
PAFELLQYSSDYSTWTESRWKSIRARIFLVASRELEMLTLGVGVAVLLLSLLV TYF ISSKAELLFSSAR  
ETPTTTY

>XP\_003978286.1 PREDICTED: nicastrin [Takifugu rubripes]  
MGGWSNKWAIILVVGCVSIGISSNSVEKKIYVNLNYTIPCVRLLNATHQIGCQSSLSGNGVGLHVLDSED  
NLEWVLNSGPNPPYLVLIDYLLFTRAVMMKLNKNGSNRVAGVAVVAPTINPSTGFSPHTTCPNENTGVYVE  
DYDPAFAHCNVTVWNPLGNGLSYEQNFPIFSLKDDNETQLIRQCYINHNLAVNNNAPQYPLCAMQMYSH  
MSAVTDTSTCMRRSDKNSFISISPEMVCDPLGDFNVWAATRPLNVT SKGHKMWESVVI AARLDSRSFFFD  
IAPGGESGVSGFVTL LAAHALRNITQENHPNRTILYTLFQGETFDYIGSSRMVYDMQNDFAVDLDNVH  
SVLEIGQVGFWSDSLWLVHSDPVSRRKNGSINDEVRKLI NNVELAANQSAIPVEEPGFSQPLPSSSFQRF  
RAHPIPGVVIEDHRSFAFTNRFYESMYDNAEYLKVSYPNMTQEEQLDFLTD TAKSLTEVATMVARTLYLQ  
AGGAETQLGNINADPQIVTRMLYGFLVQSNNSWFQIIPSEWISHLANKPTNFYVGVGTGQSSEATFLVQY  
LLANLTGSIVNITQENCQNRQEDQDDKESKHIYTYMVVQGTPLPLNSTERHGFVCRSTVHLSKAVSPAHL  
QEYNSKDYSTWTESRWKS IKGRIFLVASHDLEMLTLGVGFGVLLTSLLLTYIVSSKADILFGSEREPSNA  
TY

>XP\_014347416.1 PREDICTED: nicastrin [Latimeria chalumnae]  
MATLGMKLPQTGSLISFLGFSYIFLLIGLSSNSVERKIYIPLNYTAPCVRLLNATHQIGCQSSINGDTG  
VIHVVEKEEDLQVWLKDGPNPPYMLLEGLDFTREVMLKLDTRRVSGMAVVISKPNPAGGYSPLRCPN  
DGFGAYSPTHSPELAHNGTVWNPFNGLSYEDFKFPIFLLK DENETQVIKQCYLEHNI PVNGSAPKFPL  
CAMQLFSHMLAVTDTVTCMRNSIQARFNLNPEMLCDALGDY NVVSVVVKPINNSGTAEPEEKFILAAATRL  
DSRSFFWDIVPAAESTVSGFVTL LAAAQTIQKLPDVQSLKKNIMVFFQGETFDYIGSSRMVYDMEQKGF  
VLNLDNIDSFLELSQVGFSSNFSLWAHSDPVSRRNATINQQVMDLVSVVQNSSAGTNI TVAEPNSQALP  
PSSSFQRFRLRARNIPGVVLT DHKSSFSNRYYQSVYDTAENLLLKYPRELSPEEALNHVTDVAESL TEVATT  
VARTLYLLAGGTQRPSMIKADPLTFSGNTPLWYYVSVSSPATPTRLVQYVLANLTGTATDLTKDQCQNPT  
KDAGA EKDLYDYI WQGSSENSSEPTPFCVETT VRLSKALS PAFELKEWGSTEYSTWTESRWKEIRARI  
FLIASKELEIITLIVGLVILVVS LVGIYFINAKVDVLF TSAREPSTVAY

>NP\_001161608.1 nicastrin-like protein [Saccoglossus kowalevskii]  
MIYVGINYFSPCIRRLNATHQIGCTSAIHGNTGVLHYIDNDASLNWLVNKGPHGPYIPLMTADMFTFKNL  
QMLQKSGKINGIMVIHLADQAPPSGGFS PDYQCPNQEYGLYPDSDCSQFPWNPLGSGMMYVDY EYPIFAM  
TDENEVRHLIQYYYKENNPVNDTIPEYPLCAVQLSDRMHAAKDTETCMRRSSRYTNMEQFVYCDPLGNQN  
VFGFLKPTNKSEPLQNNSLIIAASKLDSDTLFYNMSPVAGAENDVTGFVTL LSVIEALGRLSQETKDNMS  
NIMFTFFQGESWDYIGSSRMVYDMQRDSFPNVLVEDLDQPALVLSHISHFLELRQLGLLNASKLWVHSD  
PRSQQVDPRVGPENKKIYDALHAAGVQNDIDVNRINTALPPASLQQFLKRGNISGVVVDHEHKFANRF  
YQSRFDLPGLLNADYDNQTEEYISPLAEQLNNVSVIAQALYTLAYPNGTDVMKTDLTVTNQLLYCFMYR  
PNCTLLRVTLVSSDNARKLANRAYSRYVGVYRADVKNQNSFLVSHLLHYLGEAIPNVTNKEHCHDLDMKD  
AVYAYGYISGVDGNGSCVRSMSYESPALSPAFLLEDWTSTEYSTWTESRWTSARAFYVSSKAQQTIIIL  
SIGVIILLVSLVTVYFIDKKS DILFSQERESSY

>XP\_788243.4 PREDICTED: nicastrin isoform X1 [Strongylocentrotus purpuratus]  
MTTKLTTSLSKMATIMALETHIRSLIFTLVLSVVDHIHGAQQTTSRKTHNMIYYDIKNFGPCVRRFNA  
THQIGCTSEFNGNNGVLHLIEKVADLDWLLKNGTYSPYIAVMSPQMFTLDNVQRLLDSKKNVNGIMVDHSD

PMSMINQTTFFSPDKSCPNNDNYGMYAGNPEYSNCKKVTWNSVGNMGTFMDLGIPIFALIDPEDVQTVKDC  
YEEHNRDAEDKEQFPFQCAGEMYDFMFGAKDTPTCMWRTQRMTNLESSVYCDPLGDWNVWATLLPTNKS  
TPPPDKSMIIAAAQLDIADLFYQALPTQGAENTVSGFVALLAAAQAIGALPLTTKQAMTNIMFTFFQGES  
YDYIGSSRMVYDMNKGIFPYKLDLDTKTQPSKVNLSVAAVLEVRQLALSEGDFYMHIDPLSQSDSTTQQ  
GTERLMQLLRSSAVNVMTMNVSLDQPLPPASFQQFLRNGTDIPGVVITDHEREYANKYNSRLDIAEVWG  
INYTQYNSTEFLLPIFPVAQTLANLATTIARGLYLYARPGATDADNITADVNLVNDLLYCFNQRPNCSRVR  
EAVSPEEWKSI SNSTYNYVGVDSQQSQVTILVGKLLAYYLELDSEPMQTDTAKENCIGEKDDQIFSYDF  
MAGADYNGTHGLCVKSSRHLTPAISPAFDSQVSTVYSTWTESQWSSYRIRAFLLKPSRSQEVVAFVS  
GMIVILISLCGAFFLSKRSDDLFP

>XP\_012561598.1 PREDICTED: nicastrin-like [Hydra vulgaris]  
MAASSMVLVLLICLNNAVSSSKIEFKIYKSIKSYSPCILLTNATHQVGCTSNMGGNRGILHVVESDDDVD  
WLIDKGTNQPYIPLLNSFFNENVMNKLMSKKISGVLVVKSTTVLPTSFSPDSKCLDQFGAYSNDKE  
NGNCQKIKWNPTGNDMSKKYGIPIFALADGEEINELVKCYQKHNKPKEAEATPSFPLCAIEMKDFMFAS  
KDTPTCRRKTEMPNPIQSTYCDPLGDNNIYGSFLPMVDKIENDEVIMAATRLDSTAFFHDFAPAADNGVT  
GIVTLLAAAHALGDYKRYII SENITEKLPVFTFFNGEVWDYIGSSKMVYDMERDSFPYSLKKSNTIKN  
SSKPDDGAWTSKFNLNKIAYFMEITQVGLSDKIYAHTDPVSLKDNVTMKNVEEMLKYTKESFENAFMPFD  
VVNQSLKQPLPPASFQRFRLRSYKKIAGVVLADHDKEFINKYNSRFDNLDNVGLYVKSINNVSYLKIHP  
LVKRLTNLSEAVANSYLLASGGIPPKQRIVVPANLTANLLYCLMISANCPYSYKEVLGKKSINPLPNVMS  
RYVSVLQIDNPITQVIHRLLSYTTGEWLEETQCENKAKTSLPYAFSYFAVTGRGSMVCVRSTTYMTPAVS  
PAFELQDYHSSEYSTWAESMWNDSIGMQMYLVASPASETGVLFTGIVIFAISFALVYLINRNAEVLFTPT  
PSM

>NP\_001262932.1 nicastrin, isoform E [Drosophila melanogaster]  
MEMRLNAASIWLLILSYGATIAQGERTRDKMYEPIGGASCFRRLNGTHQTGCSSTYSGSVGLHLINVEA  
DLEFLLSSPPSPYAPMIPPHLFTRRNLMRLKEAGPKNISVLLINRTNQMKQFSHELNCPNQYSGLNST  
SETCDASNPAKNWNPWGTGLLHEDFFPIIYIADLDQVTKLEKCFQDFNNHNYETHALRSLCAVEVKSFM  
SAAVNTEVCMRRTNFINNLLGGSKYCDPLEGRNVYATLYPRKPAIENNETVHTNEKFI LVTCLRLDTTTF  
DGVGLGAMDLSLMGFVAVFTHVAYLLKQLLPPQSKDLHNVLVFTFNGESYDYIGSQRFVYDMEKLFPTST  
GTPPIAGFDNIDFMLDIGTLDDISNIKLHALNGTTLAQQILERLNKYAKSPRYGFNLNIQSEMSAHLPPTS  
AQSFLLRDPNFNALILNARPTNKYYHSIYDDADNVDFTYANTSKDFTQLTEVNDFKSLNPDSLQMKVRNV  
SSIVAMALYQITITGKEYTGTKVANPLMADEFLYCFLQSADCLPKAASYPGSQLTNLPPMRYISVLGGSQ  
ESSGYTYRLLGYLLSQLQPDIDHRDNDLPLHYFAGFNNGECRLTTQNYSHALSPAFLIDGYDWSGMY  
STWTESTWSQFSARIFLRPSNVHQVTTLSVGIVVLIISFCLVYIISSRSEVLFEDLPASNAASPRPTAC

>XP\_019855736.1 PREDICTED: nicastrin-like [Amphimedon queenslandica]  
MRLSFPLTFSLFLVSLTAGLETVYQKIYTEISGIVPCFRLTNATSQIGCSATPRNVSGRVWFIDTQSSL  
DYLISSYHYKPYIVVLEPELFTSSNVLQLYNSDVVNGIIRYIQENATIPSDILNFSAPKPCPNNGFGS  
SQCRNWNNGTSLNFVNFDFKFAIFAITSNESYNSLYECYRDNNLPLNGAPFYENNRADYPLCTAELMADMQ  
SVGSTPECFQRGRIWTLNLTAPCDPLGDMNVWGTLEFELRQEQNVIMIATKLDSSAFFPYLAYGANNEMAG  
IVTLLTIAKLLGDMKRNGLINTTDSIMFTFFQGESYDYIGSSRMVYDMINNEFPYSYDSSKQPPRFGL  
PKIKAFIELSQVGIQTERETTSVYLLHNDQQSLVSALQNGADQYNVFSQSSSSSLPLPPASAQMFLRE  
NQSVPVVIVTDFDQYNNKFFGSRDYDILDNLIGPDGILDSSHPLVLQLANLAGSIARAALTLGPNPLTA  
SLPEPDELIVQLLHCFLQNSDCDFKGLFSSNVEDVLLPKPMYRYVTNTVTNTETVYVAYQLLSNFTGE  
SIPYTGCGSNCTTPDNIETYYLLNQSNCACKAYTHMHTATSPAFIDGNYSSDYSTWAESRWTSTAMRI  
YIVNSYFVEMWILIAGILLTGILTAVSFQCYRKAKNIFAISASSLNGKTIHPVN

>XP\_001748010.1 hypothetical protein [Monosiga brevicollis MX1]  
MSANTSLDVLGLHLDLCQEIWLRCRAAISAMDLFTALSACHTVHATVALASLLSIWPHEASCRLGSLVAL  
TQCRQPVDALSPLWQAWAVHVSQAQWEQLLTTAEPLVPSGEVAMLILALSALFEAQRYDLCEVLCALIQ  
RPDWRTVLTDPAISLPHLTRVFAPPVYACSTPQLKSVFVAQPLPEPLWPQLSREHPQHVGMLTPPASLT  
ATPAAVDETNLLPSCHAASTLAGASIYLASPSMPSVEALDLPLSPI SRPVHVDIDVLCALHDVEAAERP  
ALPAMAPNQPVVPPSPPLPPAVLALDSDSAILAAFI DEPLLPDATLSDARTQLLQNLQPLVETPPLT  
AIGGELFSRGRQLNRAAPADITARHWRQYLI EEP EINGTLGHTAAWQHRCRWLQNLGVTYRGGALRVLS  
SLSWNPVVLVLTQTMHQSVVAPSSTLPADLMHDSACLLYLP SARLPTVNHEPVLPTLLNVVPSPI LVSDSD  
QGVVTGEARLTNSQLQGGLELHAGNSDLGGQEIWLPCRQGLSDALVFALETQKITCVMCAEEQFPLDVVV  
DEQVGIVLLPDLSPDGRTL SARVLRRAALCTRIVVIVVNRWCVKVTCSDLIERELALAAESPYTQDAW

CKRDWLAECHESPQWQWLMASGCFNMAAGTLLLALTLRQLLEAVAVKDFEGVLQSAAGVPLASLKMMRV  
LSLVAVLALWATTLRDKVYTKLSGNEGVNSCTRLINVTHEIGCTSPEDGAVGIFFKIESADELDDFRSAT  
ESAYIVLLEQNMFAQSAVLRRELGRMDKVKGAFVYKASLPMGQTNWNPYGGGFAMDSLADSGTIGSHWV  
DFGSKAIYYLSDSDRDDLARYAALNVAGKGGKPNYPVWGARLKNFMYGVRDSDLCLRRKHCDPLSGQNV  
WGSTRLVESDSEVILATAQMDAFSFFHDLSDYGANSDASAVVSLIGAARLLGLEENYDVVANLQRNII FNL  
FNGESFGYIGSSRLGFDLRAPHWPSVDQSLSFENIKGYLELSQVLEGDSLHAHSYKSNADTANIVAKLQ  
AAAAGSSTTVVDDTASELPPASLRGFLNEWRDTRKQDAFPVGVVVTAYDSTGFANKYHGSHLDDGIATSST  
SDETRARLDCDTAVLTAKTLVAMANNTDVASVSLPVDSDSAFCDFLQEMFDCVARNQTCELARKAIGQSG  
ATADMPLSRYIGVTRSSSTVLNRGVYFFFNMLSEALAKDKNVSLGVNATCAPNNKVNVEFQTVDWTGRCMN  
TTAYVSYIMSPAFESYYKLSKSEGSNLT IHRDPRWSTWTESVWGAISADMFLMEDPAVQORTHRLPTGATTT  
MPSAENMFSELQHHPRATQHAGPPPAADVPHNGPQIMERMAMAARDYNAEPPQGRDLLRFLNSSFLPMPT  
SGGFNTALLKLDMQAGPGLSAPIELPPGSMVTVATQTDYRESETPQDPYTPDYVVRPGSAPEVLTATLA  
HGVGLPAGLAEVEMIERARARRAWEATLPPVEDASRAIERSRAIEARELEELKFREEEIQRVQDERLQVL  
EQLIVELESNKQQDREDKLNHRHYQQRQIERNRMLARSERQAVKDIRKLTARQNIIEGNLKRDRIVEQYSN  
PASEEFAPTRTLGGGVHDQHANRYRVDSKHVSSYQGLLDLEASLPKSVTTPRARAAGTNTSATGRRGGM  
ASASRRRMQDTRLQLEDTMSMARTGTLPIPPIRCVERIEKAKSILRGRAMQNEMYEQKEQRRDLIEELR  
STHALQAAQQAVKEKEREQLQARREADARETRRQATITAAVNATQSAHLGNTLDFLSKELVRLQEEHRIH  
AFAVMAERERRMREAEEAGQRQAEHRRAQGEIFRQMMQVHNGTVDSYLESILLAAQEDVADEQAREFV  
REQARRIDAAAAEAHASGYDETDLGAQAIASELVTSFLLPEVEREALRGSLOREQRKLLQGAHEAVFAKT  
QEVEGQRRWTGSRAATASGSRPRTASAQTSRPHHTTPIAIEHTGLEEDNN

>XP\_002305230.2 nicastrin-related family protein [Populus trichocarpa]  
MATDLPCLLPFLFLFISHFPLSFGSVNSMESVDPDLTKSMYVDFDGYPCVRLNLTGEIGCSNPGRDKV  
VAPVVRYKNVNEVSKPSAVLVSLDEFLELIGRISNDSSFAKNIGGVVLEQGMDSQIKLKGFSQKFKPGA  
EYAPYKSYNYEWNPIGSGMMWKAYSFPVFLLEGGQQLVQEVAMNNEKKNRNDYTADVVEFDSVMQTTKSG  
THDSESLQEQTCTFPLGGYSVWSSLPPINNSSTNHSKPIILTVASMSDSASFFRDKNLGAESPISGLIALL  
AAVDSLHVNGLDDLGLKQLVFSVFTGEAWGYLGSRRFLFELDLQSEAVNGLNSSLIETVIEIGSVGKGF  
QGNSTFFAHTAAVSLATNETLNALKHARDSLENITVSSASTLNPGIIPSSLMFAFLKKNPSTSGMVLEDFD  
TSFSDKFFYHSHLDDMSNINSSAIVAAASLVARTLYILASDDKLSSTALDAINVNASLVEELMSCLLDCE  
PGLSCELVKSYIVPTNQCPNHYVGVILGEPSSNPLYGVDVSRFMWNFLADRTSSSMEDASSDCSKECS  
NKGVCVKAIEVDGKGVCAISTTRYVPAYSTRLNYSYSGTWRVLPSSSDPMGMVDPVWTESNWDITIRLRVY  
TVQDAAFDRLVLLAGITITVMAYLAIVLTRAYIAKALKRD

>XP\_637065.2 hypothetical protein DDB\_G0287801 [Dictyostelium discoideum AX4]  
MKIKNYFIIIVFIIIVLSTDVISSQSSIEDKMYTSLNSYPCTRIMTLNGQIGCSSSHGGDSGILYLIDSDE  
SYHNYFSYNQQKDIIVVFDSNYFNKTLVLEMYSKKKMNALVLTIDIGKTYPSPEDQYPIKQFGLYPDSN  
LNWNPNNGDGFTYMNFPFPMFALELKTSIIIRNLSTINRDGKYPAYGAELDSFMQAINAETCLRRGFCEP  
VGGQSIWSSSEVIDQSKPIILVMLPIDATAFFRDLATGTDQSGYALTVLLSMLNTLQGVDKTKWDKEVI  
FAMWNSERWGYVGSTNFVNDLLNFNCTSLDSNNQNSCSSPMLDLTTFEQIKFENIYAIIEFNQIGRPVNS  
GKKTPNKLDIYNLVFHPNGGAGANQLMDVFSQSTQSYENSTIQFQKTTQNELPPCSSMSFIKEINKKSAP  
NFIGTLVITDHDYQYNNPYFGDEQDNNGINTTTTSTLFDVQVFSKSIDLLAGGNGTVKVDLDFIREINV  
CLTQSITCNWVTKLMSTFPYNPIPNFYSGVYGVSPVNHITPIETRFIFRMATYLTQHRNATNCTSDNDC  
DTSSSICVNVKCLYSNTHYHNAISLAFSFDNSKSSWTIVNTSYPVFVESNWDYTTVRLFQVGSYANEIWF  
LVSGLIELLLSVGIIIFYIKKYLKRYKLL

>XP\_001701591.1 nicastrin [Chlamydomonas reinhardtii]  
MRLALKLLAGALLVAVLSRSCNANSEARGWSQLSEVKAAMYEDMKYTRACVKLLNNSGPGCEAADMKLI  
TGPLVHYSDLTHLAGQKVVLVPAEDASKLFTQFLRDSLSLRKDVIGILVDPTTGRPPGDSAAPFPGAEFA  
PYSARDYVWNPYGAGLTQQWFGIPIYMLTETLANETGWRADYNAQNLDLKGKGVARMQLPMQAVGNSSQC  
ISDQHCLPVGQYGVWSAVPVLDPPLYVNVSARPIITLVASMSDNSLFDLTKGANTAMSGLIAGLVAMSL  
LVRANHTATYARQLAFAALPGEAFGYMGSKRLLYEMQLNSTFVRGLSLDLIDQVIDVNQVGAFFNASTNT  
SSFYLTQLAGGFGDASKLVGAAQSAATAEEPLVQAAAASPSNPGIIPSPPLMSFLRVKPGTAGMVLADFD  
SRFNSPYYQSEYDDGFNITVQALVDASVLLARTLHSLAGSPETPALEVNRTATRFLVAELAVCLILEDPG  
MRCPLASLLMSPADCGRDPSSNADVDVYDYGSTSAAVKGYPGVLRWVDVDPASRSKPNLARFVYNYLGN  
LTAAPLPADRSNSSWEGAPCDTTVNICPAPLACIGWRYGKDPAGMGRCRNTTTLTFPAYSTRLWYGNRQ  
GSRWWWVDDAAAVWERNYSWPTDPMWTESDWPARTPTLTIQEEAEAVRFWEGDEGRGGEPLTSSGAVR  
RRWPFWRASLAAVGRHDARLKLGLSNRPKVAGTFGAAGVDKGYKVPTAGGYQARLRLARRQSTRVWSRLV

PVADEVIASASLQ

>XP\_004342890.1 hypothetical protein CAOG\_07817 [Capsaspora owczaraki ATCC 30864]

MTLSDGRRRGHQQQQQGSGGALRLALVVAVAMLQVQVARADDTLNKLSKVKVYQSIPLLDFCAMLLDSD  
GEVGCASSLSGNVGLYSIQSDADLSFFIHS AERSPYSVVTTPAYFNLSIIIEQLEATGKMNGLIILSDAT  
RPTQSSHAPKPCPNCKHGLYANTDAANYAWNPEGSGLTHRRFQYPIYWLGSTSAETIRNRALS NAPKSGVE  
PDYPLWAVEMNSFMYAGGDSNICLRRGSTWCEPLGSQSIWGSTRPIRS GDTYVLATAAIDALS LFFHKQSF  
GAEADAAVVALLAADALAKEPTTITLPHNIMFMLLNGEKFDYTGSSAIANQIATGNFP SASKAFGFDD  
IKAVLDVEQIGLLDSATGPIYLHIDSNSTDPVAVANVASIVNAQVTATAGFAANI INNTATGLPPASLQA  
FLKESRGI PGVVVDHGLTFNKKLYGTFDDATLVNASDAATVNNICNVALAIANS LYALASDNSG SVPA  
MTVNCTFVQSLLTCLTVNEKCALFQQTGNLPSNLPSRYVSVFRTNTIFAFIYALRDVLAVAVASDSQPS  
LSQKACNNAKLT YIAPGLCLNTTVAFIDALSPGFDFDNFAIKNQRWNLWAESVWGS DPSMNLFLRAS YSS  
EVV IIVVGF IILGISIAV VWPVRQLIHKKYE

>OON03627.1 hypothetical protein BSLG\_06104 [Batrachochytrium salamandrivorans]

MTIVMDIAGRREPGHPLEETHAPIGISDHCLSGLLSMLWPTTTTTATTTT YTQLSVLGSKSLSLVKRASMP  
LLELLKLLKLLPQLLLQSFIMNTQSR LIETIMYAVLLTA ACTFPVVYAQTSANRQNYFLESSMYQGFSSA  
ACTRLHTAQGTIGCSALKLVSGTLYRVSSVSDVQAFANAPSGVMYVVVMPGSLMTIDVINTLRGSGKLT  
GIFTITDSIHPPGYSPEMSPNCAYGLYANQPTRYLWNPSGNSLVNSDFDFPIFGIYPGDPTS IQTINAI  
NEVLDFNAARKYINYPYAMELDSRMSSAIDSSTCLRRKRCQPLGGYSVWSTFSSGISANDQKPIV FVAS  
KIDSTALLHDYGFAGSRSGVAVMLAVVETLSRVQGGMASLPKTVVFSAFEAESWAFAGS QRMVQDMSQP  
LVCKDTSKGKPTSGCPVIGAQCN SPCLISTDFTKLNIDLIESFIEFDSIGDIHHPAGATSPHYLHVDTLNP  
QTSALVDSFKSAASPAPSTPRTSQPINVTIDVAATASNTNRLPSSAMAFLARRGDI PAMVVTDYLSQF  
SNPYYSQFDDGSTWADHVA AICGVVGTMSRGIYARAGGQTTNAAS IIPNCTLVGQLMECFTRNVSCPL  
FQQLKVDSQSAQFSGYSSVYIPTSISPMTMLSNLLMINWTASEVVGNCSDTRCTKLP SDYRCSGNRCMLS  
MTRLHRAFGTGLEASDSGIYTVVDPKRGTTWTESSWDTTRLRVFKVSSLAYQGMQLGVGLALTIGTGILT W  
YLRSKFRMH IKKDRS

>XP\_020431244.1 nicastrin [Polysphondylium pallidum PN500]

MYRFSSSIYKSFTLNINNNNISNYSSSNRY SCKIMYMLVLLLVL LLDHGCYAQSNSAVSQRIYTNVGRPL  
PCSRLLDVNGQFGCTSKEFGNSGLVHLVDSASLADLP SHAIAVLDANFFNGTIVNRIISKVEGIVVLT D  
TKQNYRYSPLDPVPNAPYGLYPKPTFSFNSAGDSLSYQSFDPKPFVLDKNNSAIARSYGNWNRDGNLPQY  
GCHLESFMHAAINAQTCLRRSFCVPVGGKSSWSTFSPEFDQSSTIIMVSVPLDATAFFHDLAYGSQTSAY  
GQTVLLGIVEALSRVANQSTW KYTVIFAAYDGERWGYLGSTKLVD DIINTECKKYTSDGYGCLDPRILD  
VTFMNISFTKIKFIVELNQIGNPLKVDGSGHYVYALNSLKSANNPDQQLLYQTFADVAKELAGKVKI ST  
QPVDQDEVPEIPPSSSMAYLKQNPNIPTIIVTDHFGVYTNNYFSSHNDDYTNINANIIVDAV TYFATVID  
RLAGGNNTIVQNSLFVEDMLDCLTKNFTCKYAQQFAGSSQPVPSFYTSVYGYGPDNQYLTIQSLFVH SVM  
AYFAASNRTGIMCDESNSCPESAQACIGGTCVITNSHFDAISLGFTFDEPSYSWVIGNTSYPTYVESNW  
NSIVINFYQQDSHTTEALFLVFGIIEMFVVI AII FVSKRYLSKRYKLLMGGFENN

>XP\_637065.2 hypothetical protein DDB\_G0287801 [Dictyostelium discoideum AX4]

MKIKNYFIIIVFIIIVLSTDVISSQSSIEDKMYTSLNSYPCTRIMTLNGQIGCSSSHGGDSGILYLIDSDE  
SYHNYFSYNQOKDIIVVFD SNYFNKTLVLEMYSK KKMNGALVLT DIGKTYPSPEDQYPIKQFGLYPDSN  
LNWNPNGDGFTYMNFPFPMFALELKT SIIIRNLSTINRDGKYPAYGAELDSFMQGA INAETCLRRGFCEP  
VGGQSIWSSFSEVIDQSKPIILVMLPIDATAFFRDLATGTDQSGYALT VLLSMLNTLQGV DKTWKDKEVI  
FAMWNSERWGYVGSTNFVNDLLNFNCTSLDSNNQNSCSPMLDLTFEQIKFENIYAIIEFNQIGRPVNS  
GKKTPNKLDIYNLVFHPNGGAGANQLMDVFSQSTQSYENSTIQFQKTTQNELPPCSMSFIKEINKKSAP  
NFIGTLVITDHDYQYNNPYFGDEQDN SGNINTTTSTLFD MVQVFSKSIDLLAGGNGTVKVDDLFIREINV  
CLTQSITCNWVTKLMSTFPYNPIPNFYSGVYGVSPVNHITPIETRFIFRMATYLTQHRTNATNCTSDNDC  
DTSSSICVNKVC LYSNTHYHNAISLAFSFDNSKSSWTIVNTSYPVFVESNWDYTTVRLFQVGSYANEIWF  
LVSGLIELLLSVGIIIFYIKK YLSKRYKLL

>OON03628.1 hypothetical protein, variant [Batrachochytrium salamandrivorans]

MTIVMDIAGRREPGHPLEETHAPIGISDHCLSGLLSMLWPTTTTTATTTT YTQLSVLGSKSLSLVKRASMP

LLELLKLLKLLPQLLLQSFIMNTQSRLIETIMYAVLLTAACTFPVVYAQTSANRQNYFLESSMYQGFSSA  
ACTRLHTAQGTIGCSALKLVSGTLYRVSSVSDVQAFANAPSGVMYVVVMPGSLMTIDVINTLRGSGKLT  
GIFTITDSIHPPGYSPEMSPNCAYGLYANQPTRYLWNPSGNSLVNSDFDFPIFGIYPGDPTSIQTINAI  
NEVLDFNAARKYINYPLYAMELDSRMSSAIDSSTCLRRKRCQPLGGYSVWSTFSSGISANDQKPIVFFVAS  
KIDSTALLHDYGFAGSRSGVAVMLAVVETLSRVQGGMASLPKTVVFSAFEAESWAFAGSQRMVQDMSQP  
LVCKDTSKGKPTSGCPVIGAQCNSPCLISTDFTKLNIDLIESFIEFDSIGDIHHPAGATSPHYLHVDTLNP  
QTSALVDSFKSAASPAPSTPRTSQPINVTIDVAATASNTNRLPPSSAMAFLARRGDI PAMVVTDYLSQF  
SNPYHYSQFDDGSTWTADHVAACGVVGTMSRGIYARAGGQTTNAASIIIPNCTLVCWRCLLLLLLLLLFFGT  
GCYLC

>K0029656.1 nicastrin [Chrysochromulina sp. CCMP291]  
MRALWLLAPLTAPLAAARSPLDGRIELRHVDPCVRLLNATGTIGCATRSSGSLAPLHVLRSDADLAALL  
RAPPEGMAVALAAPLFLHTLRLSLATTLGAKLDGVLVLDARAMPAQVPSPD LAVPLGTETQPRHPWNA  
GTGFSHERFPFAIVLLGLVESAAVLMHGVHAGTSVSGNRPLVELRYPMSARGDAPSCCLASSETCLPLGGQ  
SVWGSLEPRTAPDETELLRLGKPAVALTASLDATGFFHETAPGANA AVASLVAVLAAVDAIVSDPALASQL  
GSLPNTALFFLFTGEAWGELGSRRLTDAPFKRDLRFLLELRERRLTTLVHVGPIGAREAGEELFIHTSAA  
ATNGATNGAAEALRAAASAAPVLSAPSLQVRDATGARGLPGAARSFVDPKLQLPNSALPSVATLADFED  
AYHGGGRYGSHFDTIDGLNVSLVCAAATVAGPGIERDPSTGRWRVTDPEDEPLWTESNWPNEMYAFLYPHG  
APSTVEGLALLGVGALGALLTYVATHVSRYQYKNAYKRL

>XP\_005827562.1 hypothetical protein GUITHDRAFT\_113369 [Guillardia theta  
CCMP2712]  
MELNSEVSC TTLINNLGAVGCRSAMAGGEAGRLVVAEKQADLDALFQDKDVSRRAVLLNEDLFTLENMLA  
LKKSSRCSGILLARSDDLPTSGVFS PANPMRYCKCEEQKAPSGCSGKWNVPGNSLSEQSFNFPIIAVNSS  
RTAQLKGLIAQVKPWPMPALVVRMNFYMDVFGQFRLEQESWWEQQVDSCCPNCRPNCAGSCCDFGFEETS  
SKTHPVSWAQPTCARQKEPTSYDCIGKQTCLPLGGYNIWSVDSPSFPPPPSQGIIVAAAAMDSSAFFHDL  
AEGASSQGS AVVALIAAADALKDVRKMQELAGTPIVFALLQGEQWDHIGSRKLLSDIANFSCRKIKTSP  
SNGLPNDVCDVPPMLSPEIVQLRDNPIDFVLEVDQLT SAGGELGESQGLFFHTGCSPSDSSVKARELVLK  
QASVPGVAGVASPDEGLPFPSTIVG SVLEEATGQQEARKLAKAPKGRALLAGYSSHFTNPFYQSRFDKI  
QSGGAELRAEGLCRAASRLSMVLYSLSTGAEAPALHANCTLVRELAKIMWKHSEQEAPSSSYTSVYQPP  
TLRGP SERERFLFEQLAMATSAPGEVNETSKEASACDCCDPSGSCQPVKHFRC LQGKCVRSFAFFQDALP  
LGVAWDVNQSQFVLSQGDRNMSHVWTESNWQLNLGAMVYLEEETTVEQAVFACGLVLC ACTFLLVSSMS  
KYYERRFKHN

>CBJ31078.1 conserved unknown protein [Ectocarpus siliculosus]  
MLAAVSWCWTASAGPRRRKPVAAGGPAAGKNPSSAAALLLACIALLLSTRSEAWTGGFSPGLGHAPCVRL  
FHASGDVGCRTREGREGVAGPLFLVD SERALQDIEARGLSSFRKDAQREEEGLLPQEGSAEAMEGMGDGLM  
AVLPDAFFNRTILHRLSATGLLGGVLVLESAGGGRAAASPAHSLAQGNVRSNPDKVTPQLTCSAFKELS  
CKAGRLSFFERTEEGDSTPSAAFVDV DASYPNWSSGGDGLLME SFDFPMVLVAGGSSDDVRARAVSNGNVGG  
PSWRYP LHKARMAFYFGGSAMD LNSQECLGWT DINGDRSPQCKPLGGQSSWASVGGAGLGGRQTVLAVSG  
MDSTSMFHDRAPGANS AVSGLVALLSAAESLGTAGRSVDF SALSALPRQIVFVAFQGEAYGFTGSRRFVQD  
WRGEGISCLNRVDPTVSPTGQEACLDPLYPSLEFQKLGKPAHVVSVDQVGCLPESTLWVHPSPGASSVDT  
GVVSELSPPGGIVLTNSTRTELPPSPLTAFVKADPEQSGFVLCGYDETFSCPHYHDHADARDTVDAGSVA  
AAAKVLAKATLVLAGGTESSAEALQVNGTLVETLLDCLLEDWSCDTVKEYVVGELANNAERLGRFVSVEA  
PFPPTLYTGPLEFHYGGGMATVRHTKGDGSRWLHPSWTEPFDPEDHKIQLVNPLETFCRAFLSEQAGAA  
HAGRYGEAECQVSGDCPLEQCQESPSTADNNHDDDANKSRDGLGGRVVRPGKSEERSGNVLRSSSSS  
SSSSSVTTSSSSAVQRPECVRGRGCPCAGFH HIALDVGLEREEELDQYRVVDGAVGQGAPLWTEPNWRGI  
GAEVYLDPGVTAGKVALGVGA AVTVAAGVGSWVLLRSLDKRKL

>EWM23993.1 nicastrin [Nannochloropsis gaditana]  
MLPRARQASIALTLVGVII PFSALTEYDGIHLGKGLLKEVTQAPCVRLFSSQGTGCRTRSREGATAPL  
YYLSGFGEEDDQHEYMNLEEGVAVVMPASMLNSTVLEFLKAQSPARTRGVIVLEESKDMAADFERDSVSPD  
VSTPQGDGTPSAAFTVGP DHAWNPRGSGLLNQKHDFPVV LASVDGDSTGVGAAQV KAWAQHNGLRRAGP  
LPRYKAKFDYFGPDSPTRAESDLTSADCLSWRDVAGNPAPQCLPIGGQSVWGTFGGRTGLQTKPSVLL  
TTAMDGLSFFHERTPAANEAVASILTLLAATSALKNASRAGALDLDAAPYNLAVAFFQADEWGFAGSRRF  
ARDISP GGVD CPATVPD NSSRDGSGACVGS DGVYPSMAFKDLAEKGFVHVLAVDQVGVLGTGGQAGSLPL  
TALYDKTPPTAVLDAIDRAAASMAPSQAVMVTSLDGS GALPPSPFTSFARGTPALSGAILTYGETFIDP

RYHSHEDTAAVLDPALTSSVAALVARAFWKLAAGPGEGAASAAELEAIGVEPAFVSDLLDCLTRDWDCPA  
MKAFRDSEISNLKDYQLQMSYLYTPPVPRPPTYAGVLAQGLPLVQHLKSSHAEGVDTGIYAAWPAGQ  
VFPVGAHDKAYVVPKPLEAFLRAWLGHTLGQGGEDAPVACQGPSDCSDLTCDAGLSTRECVLDACVCRTA  
AFYHTALDPGLAPLPEPGLFAVSDPAAPNWAEPNWEDIGLAVFPDAGSRMEATALGVGVGVAALSVVGL  
VLQRLIKHHYFD

>XP\_008876423.1 hypothetical protein H310\_11498 [Aphanomyces invadans]  
MKLCGVPTLPVSVVMVTMLGELLETSRQVNVAGAVTSGAPQNPVVPVGGECVRFHSGKNGVGCFLDKDGSRA  
RLVSVSTASALNRDITLKENIVLLPDSLFTSENAKLNGEFIKGLLVYPTPTSPFNVDSTHPQGGKTVDG  
VLNPVFGDYEWNPGRDIMSSSLPYPVLEVESEAKAKEFLDLARKNEHAPAEATFGVVYRGAMDYFFGPA  
KMDSITCLNFRNIYGDSPKCLPVGGQSAWGVKGLDSSPRPAIVAMASMDTTSFVSHVYAPGANAGASGLV  
ALLAAADALKTISSALKKNIVFSAFQGESYGFVGSRRFLADLKQAKASPHGVCASPITPTPFSSHCA  
SPVRSLSAFTSLSLDSIDLAVHVDQVAQGNVWFVHPNPNAASKAVMDALTNAPSAKSRVQVSTATAALPP  
GPLVSFLNDQEFGNASLASAVLSGYDTAFSSSTYHSRRDNTSNADAAENIATAAQVLAELFASSAAVAG  
SELLASIQVNATLVRALWTCITQWNCPLMQAMSKPAVASMNEYLAFTATSSPSFVEPVRLYTSVYSDNR  
MPTVVVNSYVADLRDMKWDNAFKLHLYPNAYETFTRAFLASALRDVDPHAPACASNKDCNMDGGDECV  
YPGVCSRRRAYFHDALSPGLKREPTVGHYTVVNASMPLWTEPNWMTLGTFFVYDPDGTITIGYVALGTGAVS  
IVVGYVVARRFVAHFRKQKLL

>XP\_001312893.1 hypothetical protein [Trichomonas vaginalis G3]  
MFIFACLYLTKEYSLSFPNEFNFRMPTTDGWMGPKTRWQGNNGYLKITTAEELTNHIANKHYSETLLL  
PTSLVTDEILTLENFNFKPIKYLRAIIMYPTGDANVSSAPRYPNQKYSYHKEDYDWNPYGSGSDRKQHSF  
DIYQITSEEYLAFLALMNAFPEESGVYINNRQYSRGNFKKSYTTKSGNPLADPVSGVNIYGSFDANFT  
GPAVWAIASIDSFGLTPYNHVAGDRSMSGFIIGLLAALRALQNLTWSEATKPLRYIFFDTEEFAYSGSERF  
LYDIANFKCQTPDSNDSDACSIPIYRAYMGFKNITLDDFDTVIELQSIGLYNDSKLFHASEKEVNAEFLS  
NVTSVNYSYGVSIQADSDLPVPPSSMNSFLKYKNTFNHVVLTFGNRQYVKNIGMPDSSYNNIDIDYM  
TKAATNTARLLAKLCFPDLPEANLSSIVADKDMINQTLYGFAVNPASSIFLHFWPLSEKRPQLSTVPGS  
IYTGVSIGYSYRTHKQFIKMFMDETKAAKYVDVDCSDSEKVNCSKIDPELKCWNNRVCVSNVEFSPALY  
PGLEFDYDDYKYNVSTWDPYFAETRWNNQMLYVVTLGQAYIGRYAIFVGVLLWLILAIIGGAKLWSWNL  
KLSK

>XP\_002290995.1 predicted protein [Thalassiosira pseudonana CCMP1335]  
MVGRILHWSSVVENANNDDDAENNGNRRLANPEMAYVTILNESEYTSNTIAQLVLYSSSYVASDAYGS  
VEVGGPLRGILVLADGDGSSSDGNVNNGNNSNGYTSPESTPQGDNTPMSSLSIGSSYEWNVNNGNLT  
MTDMYGIPTVYVYDAATAEYLREVGTQASASLQSSNSNEDDTTNAVYPSILSEFNYYMGPQVTESET  
VTSKECLEWKNVDGTWSPKCLPLGGNSVWVSVAGSPVSLDYSGGEGNNSKNKPVVMLSTNIDTTSFHD  
SPGANTAASNILTLTLLSAQLVGSITDEVLDQLPGKIAFGFFQGESYGYLGSRRFLEDVVQGFNCQNGNE  
VASVYKRKDEKGIARACLHPLRADLTFQNIINLRGMIAVDQVGNLGGGKTLVHGGKESATNAQDGFAGF  
LAEVMVELSTDDYSVQASSVGEQDGVNPLPPTPLTSLVQVSEALGGIVLTGYDNAFVNDNSLYHSHLDSV  
SKLQMIDSDAIAAATVLAARSAAVAAAYQNEEEVDAATAAAYALELLPNAASSSSDFTQSLYNCLFQDGN  
CETLLTYGNVERNNDKRTGIDLGLGQPLKTPPNYYVSIYDGDNGQAFVRASEVIYGSLSVAEESGENANI  
KPYGQDAGDVFLLRPSLLEMSIAGLLNAFLGRGSFAPGDDGNTASPNLLKCESTADCSVSYCSTSSSSL  
AVPTCAGGMCVCGSRSHYHPALDEAIAPATNKRTSYFTVQDDDDGGISALYTEPFWSSSVGVRVYNDAGNT  
PGVWASSIGSVFAVICLTFVFRLLKTKLIKEKVY

>ETO25807.1 hypothetical protein RFI\_11329, partial [Reticulomyxa filosa]  
KFPYRYVEFTYEMFAKNTSLDCLQDDTCLPVGGYSVWTSFEKVSKNPNQTSGENAKKGYVFGITSMDDT  
AMFHQNVCRGSDANQSGLVALLAALSALSGVKEIIYKLSKQIMIGVFQGEAYDFVGSRKVFHDITHPFNC  
TKWMTSYSDGCWQPFVSSDFTNIEFNIGTVIELQQIGIKADSKPRQLFAHYERNVSSTNLTQALIA  
NISRIAAQVANESNQFVVPANDPSLPGTPPSSFWFLQANTNITGVVLTDFQNTNYSNQWFHSVFDIY  
QIDADQVCMTATLFAARTLLTAADTDGLLNDNFLQKNVNADCILVETLINCLMEDMTCNLVASIAPSATDP  
TPSHYTSVYQIVEDQSIIGTPQFVFRYLANLTRIGGLHGSCSEQNDQCFGQHQCAGTYDGSFCVNSSTYY  
HAAVDPQLTFNYDSQLFEVFNISNFTGLLWTESTWPSKIGTRFYVKESSDAVTTMIVCGSVAFVLSLAVT  
WKLQSYCQTRFKKPTTVLFCFVASFALLIIGTQSYLKWFAHQLFRLFLFKNTTLLLRFATTKKKIVVSV  
LTWDFVNMFGSIQIKINQVCPFFHAYFQKVLPSNLLLFQVKNCKKRDWTYGLLYAIKITLLHLKK

>XP\_009496472.1 hypothetical protein H696\_04320 [Fonticula alba]

MAHDL LADFM AVK KYGACQ THGD CASTQR CVGQTCMEITSAYHAA YGTGLAESGPGGTFEVLPRDRLPQG  
VGGTYTESHW DYTSGQVFLKSR TSAREV GELFGGIAIGALS VVLLGLAFNLLSRK LKTESDITAA LGVLG  
AAHAFGEYVRSAGIDTKT FEKDVLFALFD AEA FALAGSSRFAQEIVNFKCDKYPKGTDTTTAEWCESPYR  
QSLAFRKL SINS LAHLHLTQLGTAS PFPGDPAAGDPADQLPALAQLFAHVHNADIGSDAVKLVELLRKL  
AVLLPGPADSSSPSASSSLSSSSSSSFSEADSSLSTG SVSTSGSGSGSGSAPASASASSSAPAGPGDLPLA  
VVPWVVPVQRHQPPASTHPFLMYQDTIASVVLSD FHEHYQQ TNYHSQLD TAASLANKNVLRMICDTSTL  
IARAAFSLATGAADPA AVPAAIQANCTMVNELFDCMTTNI SCPLLAKYFTVASDNTRLNYYAGVYRPGFV  
SSQRF RFHASP RRPAFHVPWCIVASSADLWCP PPPPPHRLDAQGTGLNFRSSPVPIASLRPHGTDEDED  
SLRAILHGARSNAGLNFKGDR LHAIEMRSFMHATGSSGQCLRRKQC DPLGGHSAWAASRPLGPGASKPQS  
FVLI SAALDTNAFFQDQAFVGVGSDITAA LGVLGAAHAFGEYVRSAGIDTKT FEKDVLFALFD AEA FALAG  
RPRGHAVRPAI LLLAKTLLL LALLLAGPAPALGDLIRATGSGAGAPPTKATRDIQKNLHSEIYQETLLDPC  
VRLLSAEGTFGCHAPS NRNGVLYEANSVADVDLL LQDQDLERAGFPVPI LPVSLFSDLAI FERLVSSPRV  
AGILPSATA CAHMQIDRRDSRVTVLQAMSMSDL SGPT SASALADINSRLAKLGFVHDHLP GKPATLPRAA  
STTDYVPPCHNVGFCKNHQHYFLKDAELGLLCLTLPRETCTLEPADMCAI IRTAGGRSVLP IRADLYKAE  
KSKSSGSKFRISNYEALINTMLSEFIRHRLGAVWQEPLARRADSNFRAVRVPLGR L CALFSRLDREYLH  
RGVSSF DVFLDADSPSVTGHYMTLLNPELQLSPAALVSKKNLLQDHAGSQKKKL PDEEDLQRLAHLQPAE  
ALKALELKLGRQNIQVVCQNV AELLSSERSFLRRVTYAIEHSLPRLET FARGHPDLI STHDVQFIFSGLH  
RVVQLNRRFLQTFEVATRAFFEEHGAREILOM LFSPEEVARSPVQPVADPASGPAAPT VLSCLSWLAHRL  
EEYKPYISSIVTSLERLTKRTESSPOLADFLGGLASTEDRLQLKDLLMEPVQRLTRYDMLVSNILQHWDL  
DSVDFRQLLAIYVQVLRAGR MIDTSTFETKAMTETINIQRRLDCPPTLISSTRLLL GKVA VNVLDPSDN  
THTKCRGMLFLFSDAVMMAFQRSVIAQSSFRMERL CDLKDFSFDLLQSTPGGPVDLVVANFSPNSAGSFL  
GAMVQOELLDS PAVVSASASSASLVAGSTDSLNTFGGVPMS PGGGEDMYGGGGGGGSDTASITSINSTF  
ASTGGAAALPPHMAPLSGGGMTSLRRSNSISSVSSQASISSVATVMTMFSSGGSSRSTGVRSSGAEDTFV  
LQMVGEAHEVDIFVRLLRAMHPYASRTATTHSRLCDDR VARYHVHRLSEVDN FLLDTRSQSL SAMVILSA  
DSDLDTCFKEDLLKEYFSLAVVVIDAQRD TVSYGIRSRIEHALAGDDL TMIRVH CMPTFSEAKRTSAKGA  
ASLPDYAGQPAYDINTFGSSLSRKMLSCQSAIGQSFCSFDLDMTGTYGLMLHNI FSPLFDYASKPRNRL  
RSRGRFN TTCFTVLPSTVQGSPLRLFHGQQAHMRVNGLLAGPPPVG TAPASPRPTRSGSTSSSLFRNST  
DCPSTPGGTDDSGRKQFGPAAGHGTDF FASGGPEDPSGIPPTASVTVATT PVSRLSTSRATPHSSKSRF  
TGYLDAAEAESEIAPPMSIAPGTPR PAMRIQLRPTPGGGAGGGGGGGPAGVPGSDLGMNPLLPGIRPPG  
LTPHRNRLSQNPPGIPSSLSHVSTVGGTPGSGVAPALPLPGRAPLPAGAEPGVGEVPPAGA AVAPAPV  
PVPVHTAVSASTTTTTTTPAM SATGGEQPTDAGIPRKHAGPTGSSPFSEDMMLAPASATSLTSEAEDALS  
PGEAPATPVRSPSSLPTASGAAGAAESPLPGLADLSLA

>XP\_008618124.1 hypothetical protein SDRG\_13804 [Saprolegnia diclina VS20]  
MVRPCR VVAWLLAACVASIVEGGAVTAGAPSNPIVPAGECVRLFH SKGDVGCHSLDKQGTRARLVNVATQ  
DQLNGLVLAETSILIMPEALFTKANVAKFDATYTKGLLIYPPSSNTTTYNLDAQSPQGASTIDSALNPTF  
GNYSWNPLGRNLMGESFPYPVVQVQSADAAQRVFTLAAKN DGVPTDSSFGVVYRSLMKYFFGPPKMDSPT  
CLGFKNIRDQRS PKCYPVGGQSSWG VKGDLSATKPI LVAMAAMDTNAF SHVYAPGANAGASGLVALLAAA  
DAFKSIPSSALS KHIVFAAFQAEAYGFVGSRRFLADLTAKANNCARTITANTPFGTSFCARPLATSV AIS  
GLSMGRIEAAIAIDQVGVGSNFSVHINPSAPTAAMQSVVDGLTKAPSANGAVAKSSVSGVPPGPLVSFLN  
DKEYGNASLVA AVLSGYDTAFPATYHSRFDVNTS IDATAVTKAAQVLAEALFASAAGNGSTVAAPV V NAT  
LVAEMIACITTDWSCPLMKAVSVPFVNSMIDYLTLTATSWPLSMSPTLYAGVYSSDRVATAVLNSTNSG  
TVAVIADDVVWKDSNTLSLFPNAYEVFTRSFLAAALGEPTTATCKISKDCKGTDLECVYPGVCKTRAAHF  
HDAYS PGLEKEATPGLFKVLNANLPLWTEPNWDALGTLVY PDRSTIGYVALGVGLAIALGYLIAARFL  
AHFRKQKLL

>NP\_758844.1 gamma-secretase subunit PEN-2 [Homo sapiens]  
MNLERSVNEEKLNLCKRKYLLGGFAFLPFLWL VNI FFFFREAF LVPAYTEQSQIKGYVWRS AVGFLFWVIV  
LTSWITIFQIYRPRWGALGDYLSFTIPLGTP

>NP\_079774.1 gamma-secretase subunit PEN-2 [Mus musculus]  
MNLERSVNEEKLNLCKRKYLLGGFAFLPFLWL VNI FFFFREAF LVPAYTEQSQIKGYVWRS AVGFLFWVII  
LATWITIFQIYRPRWGALGDYLSFTIPLGTP

>NP\_001008669.1 gamma-secretase subunit PEN-2 [Bos taurus]  
MNLERVSNEEKLNLCKRKYLLGGFAFLPFLWLVNIFWFFREAFIVPAYTEQSQIKGYVWRSVAVCFFLWVIV  
LSTWITIFQIYRPRWGALGDYLSFTIPLGTP

>XP\_003225015.1 PREDICTED: gamma-secretase subunit PEN-2 [Anolis carolinensis]  
MNLERVSNEEDKLSLCKRKYLLGGFALLPFLWLVNVVWFFREAFAPAYTEQLQIKRYVQRSVAVGLLFWVIV  
LTTWISIFQARRADWGELGDYLSFTIPLGTP

>NP\_991139.1 gamma-secretase subunit PEN-2 [Danio rerio]  
MNLERIPNEEKLSLCRRYYLGGFAFLPFLWLVNIIWFFKEAFLKPAYTEQPQIKSYVKKSALGLLLWVAV  
LTTWITVFQHFRAQWGEVGDYLSFTIPLGTA

>XP\_003966057.1 PREDICTED: gamma-secretase subunit PEN-2 [Takifugu rubripes]  
MNLERLPNEEKLGLCKRKYLLGGFALLPFLWLVNVVWFFREAFFKPTYAEQLQIKTYVKRSVAVGLLLLWVAV  
LTTWITIFQHYRSEWGEVGDSSISFTIPLGIP

>NP\_001016336.1 gamma-secretase subunit PEN-2 [Xenopus tropicalis]  
MNLERVPNEEKLQLCKRKYLLGGFALLPFLWLVNVVWFFKEAFFKPAYTEQPLIQSYVKRSALGLFVWVVI  
LTTWISVYQTHRAGWGATGDYLSFTIPLGIP

>NP\_788401.2 presenilin enhancer, isoform A [Drosophila melanogaster]  
MDISKAPNPRKLELCRKYFFAGFAFLPFVWAINVCWFFTEAFHKPPFSEQSQIKRYVIYSVAVGTLFWLIV  
LTAWIIIFQTNRTAWGATADYMSFIIPLGSA

>XP\_002610690.1 hypothetical protein BRAFLDRAFT\_260605 [Branchiostoma floridae]  
MNLNRVKDEDKLELCRKYGGFFALPFLWLVNVVWFFKQAFIRPAFEQQQEIKSYIIKSLVGCILWTAV  
LVTWMTIFQMYRADWGEIADNMSFIIIPKGIA

>XP\_791533.1 PREDICTED: gamma-secretase subunit PEN-2 [Strongylocentrotus purpuratus]  
MNLAKVSDEEKLSLCKRYFIGGIFALPFLWLVNTVWFFREAFRLSAFEQQKIRSYVTWLSLIGCLVWTTG  
LIAWITVYQVKRAEWGETGDRLSFIIIPRGRP

>XP\_002732039.1 PREDICTED: gamma-secretase subunit PEN-2-like [Saccoglossus kowalevskii]  
MDLKRVANPDKLDLCRTYYKGGFFCLPFLWIVNFIWFFKDAFIKEEFPQQQMRTYIIHSAIGSVVWLAI  
IASWVVVYQIYRPIWQPFADYIAFIIIPKGIP



>XP\_002166668.1 PREDICTED: gamma-secretase subunit PEN-2-like [Hydra vulgaris]  
MDLKVKDEEKVRLSRIYMYGGFVFLPFLWFINTVWFFRDAFCKEEFEGQSLIRRSVIIISAMGAVIWSIG  
ISVWVVMYQVNRANWEEIGDKLSFLIPLGQP

>XP\_011407614.1 PREDICTED: gamma-secretase subunit PEN-2-like [Amphimedon queenslandica]  
MNLNSESVSSEEKLLICRRYFIIGCFGLPFVWLVLNGLWFIREGFFVKSEVTTRIRRYVLFVSWLGALIWIA  
AFILWTSVYQTRQNWGKSGIYLSFVLPGGVA

>XP\_002306247.2 hypothetical protein POPTR\_0005s06400g [Populus trichocarpa]  
MEASQPNTTTDTANPNPIPNTNSILSSTPVWPTIDGPLGLTEDESLIYARRFYKFGFALLPWLWAVNCF  
YFWPVLFNRSRFPRIIRPYVVRSAVGFTVFTTVLCSWALTFAIGGEQLFGPVWDKLVMYNVADRLGLTGWI

>XP\_629118.1 gamma-secretase subunit, partial [Dictyostelium discoideum AX4]  
LTWVWLINILYFIPYRNSLNDKVKWYLKFSLIGFLGYSTIFMGWMIYLVNRNKWGAFGDDISITIPFG

>XP\_001700868.1 presenilin enhancer 2 [Chlamydomonas reinhardtii]  
MDRDRDAEVHEGDQIVESVDYEVMVPVQKARTLSKRMFYGGFCFLPLMWGMNVWLFWPDFKAPRGDPIIRK  
YTKWSAIGFIVATVIFLPWLLLLYAIAGKEVLSPDVYNALNAAALDLSAYGLGIINP

## Supplementary File 3

### Presenilin mRNAs for Selection analysis

>NM\_000021.3:285-1688 Homo sapiens presenilin 1 (PSEN1), transcript variant 1, mRNA

```
ATGACAGAGTTACCTGCACCGTTGTCCTACTTCCAGAATGCACAGATGTCTGAGGACAACCACCTGAGCA
ATACTGTACGTAGCCAGAATGACAATAGAGAACGGCAGGAGCACAACGACAGACGGAGCCTTGGCCACCC
TGAGCCATTATCTAATGGACGACCCCAGGGTAACTCCCGGCAGGTGGTGGAGCAAGATGAGGAAGAAGAT
GAGGAGCTGACATTGAAATATGGCGCCAAGCATGTGATCATGCTCTTTGTCCCTGTGACTCTCTGCATGG
TGGTGGTTCGTGGCTACCATTAAGTCAGTCAGCTTTTATACCCGGAAGGATGGGCAGCTAATCTATACCCC
ATTCACAGAAGATACCGAGACTGTGGGCCAGAGAGCCCTGCACTCAATTCTGAATGCTGCCATCATGATC
AGTGTCAATTGTTGTCATGACTATCCTCCTGGTGGTCTGTATAAATACAGGTGCTATAAGGTCATCCATG
CCTGGCTTATTATATCATCTCTATTGTTGCTGTTCTTTTTTTCATTCATTTACTTGGGGGAAGTGTTTAA
AACCTATAACGTTGCTGTGGACTACATTACTGTTGCACTCCTGATCTGGAATTTTGGTGTGGTGGGAATG
ATTTCCATTCCTGAAAGGTCCACTTCGACTCCAGCAGGCATATCTCATTATGATTAGTGCCCTCATGG
CCCTGGTGTATCAAGTACCTCCCTGAATGGACTGCGTGGCTCATCTTGGCTGTGATTTTCAGTATATGA
TTTAGTGGCTGTTTTGTGTCCGAAAGGTCCACTTCGATGCTGGTTGAAACAGCTCAGGAGAGAAATGAA
ACGCTTTTTCCAGCTCTCATTACTCCTCAACAATGGTGTGGTTGGTGAATATGGCAGAAGGAGAACCCGG
AAGCTCAAAGGAGAGATATCCAAAATTCGAAGTATAATGCAGAAAGCACAGAAAGGGAGTCACAAGACAC
TGTTGCAGAGAATGATGATGGCGGGTTCAGTGAGGAATGGGAAGCCAGAGGGACAGTCATCTAGGGCCT
CATCGCTCTACACCTGAGTCACGAGCTGCTGTCCAGGAACCTTCCAGCAGTATCCTCGCTGGTGAAGACC
CAGAGGAAAGGGGAGTAAAACCTTGGATTGGGAGATTTTCAATTTCTACAGTGTCTGGTTGGTAAAGCCTC
AGCAACAGCCAGTGGAGACTGGAACACAACCATAGCCTGTTTCGTAGCCATATTAATTGGTTTGTGCCTT
ACATTATTACTCCTTGCCATTTTCAAGAAAGCATTGCCAGCTCTTCCAATCTCCATCACCTTTGGGCTTG
TTTTCTACTTTGCCACAGATTATCTTGTACAGCCTTTTATGGACCAATTAGCATTCCATCAATTTTATAT
CTAG
```

>NM\_174721.2:9-1445 Bos taurus presenilin 1 (PSEN1), mRNA

```
ATGACAGAGTTACCTGCACCCCTTGTCTACTTCCAGAATGCACAGATGTCCGAGGACAACCACCTGAGCA
ATACTGTACGTAGCCAGAATGACAGTAGAGAGCGGCATGAGCACGGCAACGAGAGGCGGAGGCGTGGCAA
CACTGAGTCGGTGTCCAATGGCCGAGCCCCAGCAGCTCACAGCAGGTGGTGGAGCAAGAGGAAGAGGAA
GATGAGGAGCTGACATTGAAATATGGCGCCAAACATGTGATCATGCTGTTTGTCCCTGTGACTCTCTGTA
TGGTGGTAGTTGTGGCCACCATCAAATCAGTCAGCTTTTATACCCGGAAGGATGGGCAGCTAATCTATAC
TCCATTTACAGAAGACACGGAGACTGTGGCGCAGAGAGCCCTGCACTCAATTCTGAATGCGGTGATCATG
ATCAGTGTCAATTGTTCATCATGACGATTCTCCTGGTGGTCTATATAAATACAGGTGCTACAAGGTCACTC
ATGCCTGGCTTATTGTTTTCATCCCTGTTGTTGCTGTTCTTTTTCTCATTCAATTTACTTGGGGGAAGTGT
TAAAACCTATAATGTTGCCATGGACTACATTTCCGTTGCGCTCCTGATCTGGAATTTTGGTGTGGTGGGA
ATGATCGCCATTCAATTGAAAGGTCCACTGAGACTCCAGCAGGCATATCTCATTATGATCAGTGCCCTCA
TGGCCCTGGTATTTATCAAGTACCTCCCAGAATGGACCGCCTGGCTCATCTTGGCTGTGATTTTCAGTATA
TGATTTAGTGGCTGTTTTGTGTCCAAAAGGCCCACTTCGATGCTGGTTGAAACAGCTCAGGAGAGAAAT
GAACTCTCTTCCCAGCTCTTATTTACTCTTCAACAATGGTGTGGTTGGTGAATATGGCAGAAGGAGACC
CAGAAGCCCAAAGGAAGGTATCCAAAACCTCCAATTACAATGCACAAAGGCCAGCCAACTCACCAGTTAC
GACGACAGGCACAGAAAGTGAGTCACAAGACCCAGTGACAGAGAGTGACGATGGTGGCTTCAGCGAAGAG
TGGGAAGCCCAGAGGGACAGTCGCCTGGGGCCTCATCACTCTACAGCTGAGTCGCGATCTGCCGTTCCAGG
ACCTTTCCAGCAGCATCCTGGCCAGTGAGGACCCAGAGGAAAGGGGAGTAAAGCTTGGATTAGGAGATTT
CATTTTCTACAGTGTCTGGTTGGTAAAGCTTCTGCAACAGCCAGTGGAGACTGGAACACAACCATTGCC
TGTTTTGTAGCCATATTAATTGGTTTGTGCCTTACATTATTGCTCCTCGCCATTTTCAAGAAAGCATTAC
CAGCTCTTCCAGTCTCTATCACCTTTGGGCTTATTTTCTACTTTGCCACAGATTATCTTGTTCAGCCCTT
TATGGACCAGTTAGCATTCCATCAGTTTTATATCTAG
```

>XM\_016926336.1:695-2158 PREDICTED: Pan troglodytes presenilin 1 (PSEN1), transcript variant X1, mRNA

```
ATGACGACAACGGTGGGGTCTCGGGCGGGGCTGGGACAGGCAGCTCCGGGGTCCGCGGTTTCACATC
GGAAACAAAACAGCGGCTGGTCTGGAAGGAACCTGAGCTACGAGCCGCGGCGGCAGCGGGGCGGCGGGGA
AGCGTATAATGACAATAGAGAACGGCAGGAGCACAACGACAGACGGAGCCTTGGCCACCCTGAGCCATTA
TCTAATGGACGACCCCAGGGTAACTCGCGGCAGGTGGTGGAGCAAGATGAGGAAGAAGATGAGGAGCTGA
CATTGAAATATGGCGCCAAGCATGTGATCATGCTCTTTGTCCCTGTGACTCTCTGCATGGTGGTTCGT
GGCTACCATTAAGTCAGTCAGCTTTTATACCCGGAAGGATGGGCAGCTAATCTATACCCCATTCACAGAA
```

GATACCGAGACTGTGGGCCAGAGAGCCCTGCACTCAATTCTGAATGCTGCCATCATGATCAGTGTTCATTG  
TTGTCATGACTATCCTCCTGGTGGTTCTGTATAAATACAGGTGCTATAAGGTCATCCATGCCTGGCTTAT  
TATATCATCTCTATTGTTGCTGTTCTTTTTTTTTCATTCAATTTACTTGGGGGAAGTGTAAAACCTATAAC  
GTTGCTGTGGACTACATTACTGTTGCACTCCTGATCTGGAATTTTGGTGTGGTGGGAATGATTTCCATTC  
ACTGGAAAGGACCCTTCGACTCCAGCAGGCATATCTCATTATGATTAGTGCCCTCATGGCCCTGGTGT  
TATCAAGTACCTCCCTGAATGGACTGCGTGGCTCATCTTGGCTGTGATTTTCAGTATATGATTTAGTGGCT  
GTTTTGTGTCCGAAAGGTCCACTTCGTATGCTGGTTGAAACAGCTCAGGAGAGAAATGAAACGCTTTTTTC  
CAGCTCTCATTACTCCTCAACAATGGTGTGGTTGGTGAATATGGCAGAAGGAGACCCGGAAGCTCAAAG  
GAGAGTATCCAAAAATTCCAAGTATAATGCAGAAAGCACAGAAAGGGAGTCACAAGACACTGTTGCAGAG  
AATGATGATGGCGGGTTTCAGTGAGGAATGGGAAGCCCAGAGGGACAGTCATCTAGGGCCTCATCGCTCTA  
CACCTGAGTCACGACTGCTGTCCAGGAATTTCCAGCAGTATCCTCGCTGGTGAAGACCCAGAGGAAAG  
GGGAGTAAAACCTGGATTGGGAGATTTTCATTTTCTACAGTGTCTGGTTGGTAAAGCCTCAGCAACAGCC  
AGTGGAGACTGGAACACAACCATAGCCTGTTTTCGTAGCCATATTAATTGGTTTTGTGCCTTACATTATTAC  
TCCTTGCCATTTTCAAGAAAGCATTGCCAGCTCTTCCAATCTCCATCACCTTTGGGCTTGTCTACTT  
TGCCACAGATTATCTTGTACAGCCTTTTATGGACCAATTAGCATTCCATCAATTTTATATCTAG

>NM\_019163.3 *Rattus norvegicus* presenilin 1 (*Psen1*), mRNA

ATGACAGAGATACCTGCACCTTTGTCCTACTTCCAGAATGCACAGATGTCTGAGGACAGCCACTCCAGCA  
GCGTCCGTAGCCAGAATGACAATCAAGAACGGCAGCAGCATCATGACAGACAGAGACTTGACAACCCTGA  
GTCGATATCTAATGGCCGACCCAGAGTAACTTTACCAGGCAGGTGATAGAGCAAGATGAGGAGGAAGAC  
GAAGAGCTGACATTGAAATATGGAGCCAAGCACGTCATCATGCTCTTTGTTCCCTGTGACCCTCTGCATGG  
TCGTTGTGGTGGCCACCATCAAGTCAGTCAGCTTCTACACCCGGAAGGATGGGCAGCTAATCTATACCCC  
ATTCACAGAAGACACCGAGACTGTAGGCCAGAGAGCCCTGCACTCGATCTTGAATGCCGCCATCATGATC  
AGTGTTCATCGTCGTTATGACCATCCTCCTGGTGGTCTGTATAAGTACAGGTGCTACAAGGTCATCCATG  
CCTGGCTTATTGTTTCATCTCTGTTGTTGCTGTTCTTTTTTTTTCATTCAATTTACTTAGGGGAAGTATTCAA  
GACCTACAATGTGCGCCGTGGACTATATTACGGTTGCACTCCTGATCTGGAATTTTGGTGTGGTGGGATG  
ATTGCCATTCCTGAAAGGCCACTCCGACTGCAGCAGGCATCTCATTATGATCAGTGCCCTCATGG  
CCCTGGTATTTATCAAGTACCTCCCTGAATGGACCGCATGGCTCATCTTGGCTGTGATTTTCAGTATATGA  
TTTGGTGGCTGTTCTGTGCCCAAAGGTCCACTTCGTATGCTGGTTCGAAACAGCTCAGGAAAGAAATGAG  
ACTCTCTTTCCAGCTCTTATCTATTCTCAACCTATGGTGTGGTTGGTGAATATGGCTGAAGGAGACCCAG  
AAGCCCAAAGGAGGGTACCCAAAACCCCAAGTATAGCACACAAGGAACAGAGAGGGAAGAGACACAGGA  
CACTGGCACTGGGAGCGATGATGGTGGCTTTCAGTGGAGTGGGAGGCCCAAAGAGACAGTCACCTGGGG  
CCTCATCGCTCCACTCCTGAGTCAAGAGCTGCTGTCCAGGAACCTTCTGGGAGCATCCTCACTAGTGAAG  
ACCCGGAGGAAAGAGGAGTAAAGCTTGGGCTGGGAGATTTCAATTTTCTACAGTGTCTGGTTGGTAAGGC  
CTCAGCGACCGCCAGTGGGGACTGGAACACAACCATAGCCTGCTTTGTAGCCATATTGATCGGCCTGTGC  
CTTACGTTACTCCTGCTCGCCATTTTCAAGAAAGCGTTGCCGGCCCTTCCCATCTCCATCACCTTCGGGC  
TCATTTTCTACTTTGCCACGGATTATCTCGTGCAGCCCTTCATGGACCAACTTGCATTCCATCAATTTTA  
TATCTAG

>NM\_008943.2:492-1895 *Mus musculus* presenilin 1 (*Psen1*), mRNA

ATGACAGAGATACCTGCACCTTTGTCCTACTTCCAGAATGCCAGATGTCTGAGGACAGCCACTCCAGCA  
GCGCCATCCGGAGCCAGAATGACAGCCAAGAACGGCAGCAGCATGACAGGCAGAGACTTGACAACCC  
TGAGCCAATATCTAATGGGCGGCCCCAGAGTAACTCAAGACAGGTGGTGGAAACAAGATGAGGAGGAAGAC  
GAAGAGCTGACATTGAAATATGGAGCCAAGCATGTCATCATGCTCTTTGTCCCGTGACCCTCTGCATGG  
TCGTCGTCGTTGGCCACCATCAAATCAGTCAGCTTCTATACCCGGAAGGACGGTCAGCTAATCTACACCCC  
ATTCACAGAAGACACTGAGACTGTAGGCCAAAGAGCCCTGCACTCGATCCTGAATGCCGCCATCATGATC  
AGTGTCAATGTCAATTATGACCATCCTCCTGGTGGTCTGTATAAATACAGGTGCTACAAGGTCATCCACG  
CCTGGCTTATTATTTTCATCTCTGTTGTTGCTGTTCTTTTTTTCGTTCAATTTACTTAGGGGAAGTATTTAA  
GACCTACAATGTGCGCCGTGGACTACGTTACAGTAGCCTCTAATCTGGAATTTTGGTGTGGTGGGATG  
ATTGCCATCCACTGAAAGGCCCTTTCGACTGCAGCAGGCATCTCATTATGATCAGTGCCCTCATGG  
CCCTGGTATTTATCAAGTACCTCCCGAATGGACCGCATGGCTCATCTTGGCTGTGATTTTCAGTATATGA  
TTTTGGTGGCTGTTTTATGTCCCAAAGGCCCACTTCGTATGCTGGTTGAAACAGCTCAGGAAAGAAATGAG  
ACTCTCTTTCCAGCTCTTATCTATTCTCAACAATGGTGTGGTTGGTGAATATGGCTGAAGGAGACCCAG  
AAGCCCAAAGGAGGGTACCCAAAACCCCAAGTATAACACACAAGAGCGGAGAGAGAGACACAGGACAG  
TGTTTCTGGGAACGATGATGGTGGCTTCAGTGAGGAGTGGGAGGCCCAAAGAGACAGTCACCTGGGGCCT  
CATCGCTCCACTCCCGAGTCAAGAGCTGCTGTCCAGGAACCTTCTGGGAGCATTCTAACGAGTGAAGACC  
CGGAGGAAAGAGGAGTAAAACCTGGACTGGGAGATTTCAATTTTCTACAGTGTCTGGTTGGTAAGGCCTC  
AGCAACCGCCAGTGGAGACTGGAACACAACCATAGCCTGCTTTGTAGCCATACTGATCGGCCTGTGCCTT  
ACATTACTCCTGCTCGCCATTTTCAAGAAAGCGTTGCCAGCCCTCCCATCTCCATCACCTTCGGGCTCG

TGTTCTACTTCGCCACGGATTACCTTGTGCAGCCCTTCATGGACCAACTTGCATTCCATCAGTTTTATAT  
CTAG

>XM\_008103943.2:169-1575 PREDICTED: *Anolis carolinensis* presenilin 1 (psen1),  
transcript variant X1, mRNA

ATGGCAGAACTATCTGCACACTTATCACAGGTCCAGCGTGGGCAATTGAAAGAGACCTCTCCTGACAACC  
ATTTGACCAATACTAATGATAACATTGAAAGACGGCGTCAGGAGGGTAGCAGTCAGAGACGCACTGATAA  
TCCCGATGCAGCATCTAATGGGCAGCCCCAGAACAGCACTCGGCAAGTGGTGGAAACAAGACGACGACGAT  
GAAGAAGAGCTGACATTGAAATATGGCGCAAAGCATGTGATTATGCTCTTTGTGCCTGTCACCCTTTGTA  
TGGTGGTAGTTGTGCGCAACTATTAATCTGTGAGTTTTTATACACGCAAGGATGGACAGCTAATCTACAC  
ACCATTTACAGAAGATACAGAAACAGTTGGACAAGAGCTCTAAATTTCTGTTTTGAATGCAGCCATTATG  
ATTAGTGTCACTATTGTCAATGACCATACTTCTGGTTGTGCTTTTATAAGTACCGGTGCTATAAGGTGATCC  
ATGGTTGGCTCATCGTTTTCTCTCTTCTTGGTTTTCTTTTTTTCATTCATTTACTTAGGGGAGGTTTT  
TAAGACTTACAATGTTGCTATGGACTACATTACTGTTGCACTCATGATCTGGAACCTTTGGTGTAGTAGGG  
ATGATTTGCATTCACTGGAAAGGCCCTCTCCGGCTGCAGCAGGCCTATCTCATTATGATAAGTGCTCTAA  
TGGCTCTGGTGTATCAAAATATCTTCTGAATGGACTGCATGGCTCATCTTGGCAGTGATTTTCACTTA  
TGACCTGATTGCTGTACTGTGCTCTAAGGGGCCCTCTTCGTATGCTGGTTGAAACTGCTCAAGAGAGAAAT  
GAGACTTTGTTCCAGCACTTATTTATTCATCAACAATGATATGGCTGGTGAACATGGCTGAGGAAGATC  
CTGAAGCCCCAAAAGAGCCCCAAAAGTTCTACGTATGACAAGCAAGTCACAGCAAACCAGAACCAAAA  
CGCAGGTGCGGAGACTGATGATGGAGGCTTCAGCCAGGAATGGGAACAGCAACGGGACAATAGGATAGGA  
CCTCTAGAATCGACTCCTGAGACACGAGCTGTTGTTCAAGCGATGCCTGCAGATTCCGTAGGAAGTGAGG  
ACCCCGATGAGAGGGGAGTTAAGCTTGGTTTAGGAGACTTCATTTTCTACAGCGTTCTAGTTGGCAAAGC  
CTCAGCAACAGCCAGTGGAGACTGGAACACAACCTTTAGCCTGTTTTGTAGCCATTTTAATTGGCCTGTGC  
CTTACCCTCTTATTGCTGGCCATTTTTAAAAGGCCCTTACCAGCTCTTCCAATCTCCATAACCTTTGGGC  
TCGTTTTCTATTTTGGCCACAGATAACCTGGTGCAACCTTTTATGGACCAGCTTGCCATACCATCAGTTTTA  
TATCTAG

>NM\_001090554.2:148-1449 *Xenopus laevis* presenilin 1 L homeolog (psen1.L),  
mRNA

ATGAATGACACCAGTGAAAGAAGAAGCAATGAGAAGTCTCAGAGTCTCAGAGCAATGGGCAGACACAGAGCA  
GTTCCAGCAAGTATTGGAACAGGATGAGGAAGAAGATGAGGAACTCACCTTGAATATGGAGCCAAGCA  
TGTAATCATGCTGTTTGTCCCTGTCACTATGCATGGTGGTGGTTGTTGCAACCATCAAGTCTGTCAGC  
TTTTACACACGCTTTGATGGGCAGCTAATCTACACCCCATTCACAGAAGACACAGAAAGTGTGGACAAA  
GAGCCCTGAACTCCATACTCAACGCGACCATAATGATCAGTGTAATTATAGTTATGACCATACTGCTGGT  
TGTTCTATAACAAGTACAGATGTTACAAGGTCACTCCATGGCTGGCTCATCATATCTTCCCTTTTATTGCTT  
TTTTTCTTCTCTTATATATACCTTGGTGAAGTGTAAAACCTATAATGTGGCCGTGGATTACATCACTC  
TGGCTTTACTGATCTGGAATTTTGGTGTAGTAGGAATGATATGCATTCCTGGAAGGGACCCCTTCTCCT  
GCAGCAGGCCTATCTTATCATGATTAGTGTCTTATGGCTTTGGTGTATTAATAACCTTCCCTGAGTGG  
ACAACCTGGCTCATCTTAGCCGTGATATCTGTTTATGATCTCGTTGCTGTCTCCAAAAGGACCTT  
TACGAATGCTGGTGCAGACAGCACAGGAGAGAAATGAAACCTTTTTCCAGCATTAAATTTATTCTTCTAC  
AATGATATGGTTAGTGAACATGGCAGATGGAGATCCTGGTTTTAAAGCAAAGTGCCTCAACGAAAACATAC  
AACACACAAGCTCCAACCTGCCATCCGAGGAGTGATTCTGCAGCATCTGATGATAATGGTGGCTTTGATA  
CAACTTGGGAGGACCACAGGAATGCACAGATCGGACCAATTAATTCTACTCCAGAATCCAGAGTTGCTGT  
CCAGGCTCTTCCGAGCAACAGCCCCCAAGTGAAGACCCTGAAGAGAGGGGAGTGAACCTTGGACTGGGA  
GACTTCATTTTCTATAGTGTACTTGTGGAAAGGCATCTGCCACTGCTAGCGGAGACTGGAACACTACAC  
TGGCTTGTGTTTGTGGCCATACTGATTGGCCTTTGCCTTACATTACTTCTACTCGCCATCTTCAAGAAAGC  
ATTACCTGCTCTCCCCATCTCTATAACTTTTGGACTTGTATTTTATTTTGGCCACGGACTACCTTGTACAG  
CCATTCATGGACCAACTGGCATTCCACCAGTTTTATATTTAA

>XM\_003978483.2:230-1642 PREDICTED: *Takifugu rubripes* presenilin 1 (psen1),  
mRNA

ATGGCAAACAATGCAGAGGATATCGAGAACAATATGAACCAAGAGCCCAGCGTGGTGAACCATGAACCCG  
CTGTGCAGCCACAGGAGGTGTCCGTGACCCGATCACGGTCCAGAGGAGGAGGTGGGCATGGTGAAGGTGG  
ACCGGAGCAGAATGGACAGCCCCCGCCACCCATGCTGCCACGTGGTGGAGACTGAGGAGGACGAGGAC  
GAAGAGCTAACCTTGAATACGGGGCCAAGCACGTCATCATGCTGTTTGTCCCGTGACCCTCTGCATGG  
TTGTTGTCGTGGCAACCATTAAGTCGGTCACCTACTACACCCAGAATGACGGGCAGAGACTGATCTACAC  
ACCCTTCCCCGAAGACACGGACACGGTGGCACAGCGAGCTCTCAACTCCATCCTGAACGCCACCATCATG  
ATCACTGTGATCATCATGACTCTGGTGTGGTGGTTCTGTACAAATACCGCTGCTACAAGGTCACTC

AGGGCTGGCTCTTCCTCTCCTCCCTCCTCTTGCTTTTCTTCTTCTCCTACATCTACCTCCAAGAAGTTTT  
CAAGACCTACAACCTGGCCATGGACTATTTACCCTAGCAATAATAATTTGGAATTTGGGGTGGTTGGC  
ATGATGTGCATTCACTGGAAGGACCCTGCGGCTCCAGCAGGCCTACCTCATCATGATCAGTGCCCTCA  
TGGCTCTGGTCTTCATCAAGTACCTGCCAGAGTGGACCGCCTGGCTCATATTAGCCGTCATATCTGTTTA  
TGATCTGCTAGCGGTGCTCTGTCCCAAAGGACCTCTGAGGATCCTGGTGGAGACGGCCAGGAGAGGAAC  
GAGCCCATCTTTCCAGCTCTCATCTACTCTTCAACGATGGTGTGGCTGGTCAACATGGCAGACACCGACA  
GGCCAAAAGGAGCTCCACAGACGCAGCACCCTCAACAGGAGACCCAAGAAGCCGTGGCGTCCCCGAC  
TCCCTCCAGTTTGTCCAGGATGATGGAGGCTTACCCCTCCTGGGTTAGTCAGCAGGAACACCAGCTG  
GGAACCCTCCAGTCCACCAGCAGAGCCGGCAGGAGATCCAGGAGATGCCCTCTGCCCGACCTGCTGCTG  
AAGATGACGATGAAGAGAGAGGTGTGAAGCTGGGGCTGGGAGACTTCATCTTCTACAGCATGCTGGTGGG  
AAAGCCTCTGCCACGGCCAGTGGCGACTGGAACACCACGCTGGCGTGTTCGTGGCCATCCTCATCGGC  
CTGTGTCTGACTCTGCTCCTCCTCGCCATCTTCAAGAAAGCGCTCCCTGCGCTGCCATCTCCATCTTCT  
TCGGCCTGGTCTTCTACTTTCGCCACAGACAACCTTGGTTTCCAGCCCTTTCATGGACAAGCTGGCCCTGCACCA  
GTTCTACATTTAG

>NM\_131024.1:62-1432 *Danio rerio* presenilin 1 (*psen1*), mRNA

ATGGCTGATTTAGTGCAGAATGCTGCCAATAATGTGTTAAATGATGGGATGGACACCAGCCGGCACACAA  
GCAGCACCAGCGCGCCGCCAGCCGTAATGAGGTGGAGCTGAACGGGCAGCCGCCACCCTCCGCCCC  
GCAGGTGGTCACAGACAGTGAAGAACGAGGACGAGGAGCTCACTCTCAAATATGGGGCGAAGCACGTC  
ATCATGCTGTTTATTCCCGTACGCTCTGCATGGTGGTGGTGGTGGCGACCATCAAATCCGTGAGCTTCT  
ACACGCAGAAGGACGGACAGCAGCTGATCTACACCCGTTTCGTGAGGACACGGAGACGGTGGGTGAGCG  
AGCTCTGCACTCCATGCTCAACGCCATCATCATGATCAGTGTGATTGTGGTCATGACCCTGGTGGTGGT  
GTGCTCTACAAGTACAGATGCTACAAGGTGATTCAAGCCTGGCTGTTCTTCTCCAACCTCCTCCTGCTCT  
TCTTTTTCTCCTTAATTTATTTGGGGGAAGTGTTCAGACGTATAACGTGGCGATGGATTACTTACGCT  
GGCGTTGATCATCTGGAACCTCCGTGTGGTGGGAATGATCTGCATCCACTGGAAGGGGCCGCTGCGGCTT  
CAGCAGGCCTATCTGATCATGATCAGCGCTCTCATGGCTCTGGTCTTTCATCAAATATCTCCCCGAGTGG  
CCGATGGCTCATCTCCGCTGCTATTTTCACTTACGATCTTCTGGCAGTGTGTGTCCGAAAGGCCCTCT  
CGCAATCCTTGTGGAAACGGCTCAAGAGAGGAATGAGGCCATTTTCCAGCGCTCATCTACTCCTCAG  
ATGGTGTGGCTCTTCAATATGGCGGACAGTGTGAAACCAGGAATAATTCCAGTCATCCAGTCCCTCAGC  
AGGAGAACCAGGTAGTTGCGATGGCTCCACAGCTCAGGCGGAGGACGATGGCGGCTTCACTCCGGCGTG  
GGTGGATCATCAGCAGCATCAGCTCGGACCCATGCAGTCCACGGAGGAGAGCAGACGACAGATCCAGGAG  
ATGCCAGCGCTCGGCCACCACCAGCAGATGATGACGAAGAGCGGGGTGTGAAGCTGGGTTGGGAG  
ATTTTCTTTTTACAGTATGCTGGTGGGTAAAGCATCAGCTACAGCCAGCGGTGACTGGAACACGACGCT  
AGCCTGCTTTCGTGGCCATTCTCATTGGTTTTATGTCTGACTCTCCTCCTGCTGGCCATCTTCAAGAAGGCT  
CTTCCCGCTCTCCCCATCTCCATAACCTTCCGCTGGTGTTTTACTTTGCCACTGATAACCTCGTGGCG  
CGTTCATGGACCAGCTGGCCGTCCATCAGTTCTACATATAG

>NM\_000447.2:428-1774 *Homo sapiens* presenilin 2 (*PSEN2*), transcript variant 1, mRNA

ATGCTCACATTCATGGCCTCTGACAGCGAGGAAGAAGTGTGTGATGAGCGGACGTCCTAATGTCCGGCTG  
AGAGCCCCACGCCGCGCTCCTGCCAGGAGGGCAGGCAGGGCCAGAGGATGGAGAGAACACTGCCAGTG  
GAGAAGCCAGGAGAACGAGGAGGACGGTGGAGGAGACCCTGACCGCTATGTCTGTAGTGGGGTTCCCGGG  
CGGCCGCCAGGCCTGGAGGAAGAGCTGACCCTCAAATACGGAGCGAAGCACGTGATCATGCTGTTTGTGC  
CTGTCACTCTGTGCATGATCGTGGTGGTAGCCACCATCAAGTCTGTGCGCTTCTACACAGAGAAGAATGG  
ACAGCTCATCTACACGCCATTCACTGAGGACACACCCTCGGTGGGCCAGCGCCTCCTCAACTCCGTGCTG  
AACACCCTCATCATGATCAGCGTCATCGTGGTTATGACCATCTTCTTGGTGGTGTCTTACAAGTACCCT  
GCTACAAGTTTATCCATGGCTGGTTGATCATGTCTTCACTGATGCTGCTGTTCTTCCATTTACCTATATCTA  
CCTTGGGGAAGTGTCAAGACCTACAATGTGGCCATGGACTACCCACCCTCTTGTGCTGACTGTCTGGAAC  
TTCGGGGCAGTGGGCATGGTGTGCATCCACTGGAAGGGCCCTCTGGTGTGCAGCAGGCCTACCTCATCA  
TGATCAGTGCCTCATGGCCCTAGTGTTCATCAAGTACCTCCCAGAGTGGTCCGCGTGGGTGATCCTGGG  
CGCCATCTCTGTGTATGATCTCGTGGCTGTGCTGTGTCCCAAAGGGCCTCTGAGAATGCTGGTAGAACT  
GCCAGGAGAGAAATGAGCCCATATTCCTGCCCTGATATACTCATCTGCCATGGTGTGGACGGTTGGCA  
TGGCGAAGCTGGACCCCTCCTCTCAGGGTGGCCTCCAGCTCCCCTACGACCCGGAGATGGAAGAAGACTC  
CTATGACAGTTTTGGGGAGCCTTACATACCCGAAGTCTTTGAGCCTCCCTTACTGGCTACCCAGGGGAG  
GAGCTGGAGGAAGAGGAGGAAAGGGCGTGAAGCTTGGCCTCGGGGACTTCATCTTCTACAGTGTGCTGG  
TGGGCAAGGCGGCTGCCACGGGCAGCGGGGACTGGAATACCACGCTGGCCTGCTTTCGTGGCCATCCTCAT  
TGGCTTGTGTCTGACCCTCCTGCTGCTTGTGTGTTCAAGAAGGCGCTGCCCGCCCTCCCCATCTCCAT

ACGTTTCGGGCTCATCTTTTACTTCTCCACGGACAACCTGGTGC GGCCGTTTCATGGACACCCTGGCCTCCC  
ATCAGCTCTACATCTGA

>XM\_016939911.1:668-2014 PREDICTED: Pan troglodytes presenilin 2 (PSEN2),  
transcript variant X2, mRNA

ATGCTCACATTCATGGCCTCTGACAGCGAGGAAGAAGTGTGTGATGAGCGGACTTCCCTAATGTTCGGCCG  
AGAGCCCCACGCCGCGCTCCTGCCAGGAGGGCAGGCAGGGCCCAGAGGACGGAGAGAACAACACTGCCAGTG  
GAGAAGCCAGGAGAACGAGGAGGACGGTGAGGAGGACCCTGACCGCTACGTCTGTAGTGGGGTTCGCCGG  
CGGCCGCCAGGCCTGGAGGAAGAGCTGACCCTCAAATACGGGGCGAAGCACGTGATCATGCTGTTTGTGC  
CTGTCACTCTGTGCATGATCGTGGTGGTAGCCACCATCAAGTCTGTGCGCTTCTACACAGAGAAGAATGG  
ACAGCTCATCTACACGCCATTCAGTACTGAGGACACAGCCTCGGTGGGCCAGCGCCTCCTCAACTCCGTGCTG  
AACACCCTCATCATGATCAGCGTCATCGTGGTTATGACCATCTTCTTGGTGGTGTCTACAAGTACCGCT  
GCTACAAGTTCATCCATGGCTGGTTGATCATGTCTTCACTGATGCTGCTGTTCTTCTTACCTATATCTA  
CCTTGGGGAAGTGTCAAGACCTACAATGTGGCCATGGACTACCCACCCTCTTGCTGACTGTCTGGAAC  
TTCGGGGCAGTGGGCATGGTGTGCATCCACTGGAAGGGCCCTCTGGTGTGCAGCAGGCCTACCTCATCA  
TGATCAGTGCCTCATGGCCCTAGTGTTCATCAAGTACCTCCCAGAGTGGTCCGCGTGGGTTCATCCTGGG  
TGCCATCTCTGTGTATGATCTCGTGGCTGTGCTGTGTCCCAAAGGGCCTCTGAGAATGCTGGTAGAACT  
GCCCAGGAGAGAAATGAGCCCATATTCCTGCCCTGATATACTCATCTGCCATGGTGTGGACGGTTGGCA  
TGGCGAAGCTGGACCCCTCCTCTCAGGGTGGCCCTCCAGCTCCCCTACGACCCAGAGATGGAAGAAGACTC  
CTATGACAGTTTTGGGGAGCCTTCATACCCCGAAGTCTTTGAGCCTCCCTTGACTGGCTACCCAGGGGAG  
GAGCTGGAGGAAGAGGAGGAAAGGGGCGTGAAGCTTGGCCTCGGGGACTTCATCTTCTACAGTGTGCTGG  
TGGGCAAGGCGGCTGCCACGGGCAGTGGGGACTGGAATACCACGCTGGCCTGCTTCGTGGCCATCCTCAT  
TGGCTTGTGTCTGACCCCTCCTGCTGCTTGTGTGTTCAAGAAGGCGCTGCCCGCCCTCCCCATCTCCATC  
ACGTTTCGGGCTCATCTTTTACTTCTCCACGGACAACCTGGTGC GGCCGTTTCATGGACACCCTGGCCTCCC  
ATCAGCTCTACATCTGA

>NM\_011183.3:91-1437 Mus musculus presenilin 2 (Psen2), transcript variant 1,  
mRNA

ATGCTCGCATTTCATGGCCTCTGACAGCGAGGAAGAGGTGTGTGATGAGCGGACGTCCTTGATGTTCAGCCG  
AGAGCCCCACATCTCGCTCCTGCCAGGAAGGCAGGCCAGGCCCGGAGGATGGAGAGAGCACTGCCAGTG  
GAGGACTCAGGAGAGCGAAGAAGACTGTGAAGAGGACCCGGACCGCTACGCATGCAGTGGGGCTCCTGGG  
CGACCGTCGGGCCTGGAGGAAGAGCTGACCCTCAAGTATGGGGCGAAGCATGTGATCATGCTATTTCGTGC  
CTGTACGCTGTGTATGATCGTGGTGGTGGCCACTATCAAGTCTGTGCGTTTTCTACACTGAGAAGAACGG  
GCAGCTCATCTACACGCCCTTCACGGAGGACACGCCCTCGGTGGGCCAGCGGCTCCTCAACTCCGTGCTT  
AACACCCTCATCATGATCAGCGTCATCGTAGTCATGACCATCTTCTCCTGCTGGTACTCTACAAGTATCGAT  
GCTACAAGTTCATCCATGGCTGGCTGATCATGTCTCCTCCCTGATGCTCCTCTTCTTGTTCACCTACATCTA  
CCTCGGGGAAGTGTCAAGACCTACAATGTGGCCATGGACTATCCACACTCTTCTGGCTGTCTGGAAC  
TTCGGGGCAGTGGGCATGGTGTGCATCCACTGGAAGGGCCCTCTGGTGTGCAGCAGGCCTTACCTTATTG  
TGATCAGCGCACTCATGGCCCTGGTGTTCATCAAGTACCTGCCGGAGTGGTCTGCCTGGGTTCATCTGGG  
TGCCATCTCTGTGTACGATCTCGTGGCCGTGCTGTGCCCAAAGGGCCACTGAGGATGCTGGTGGAACT  
GCCCAGGAGAGAAATGAGCCCATATTTCTGCCCTGATATACTCATCTGCCATGGTGTGGACGGTGGGCA  
TGGCAAAGCTGGACCCCTCCTCTCAAGGAGCGCTGCAGCTCCCCTATGACCCAGAGATGGAAGAAGACTC  
CTACGACAGTTTTGGAGAACCCTCATAACCCTGAAGCCTTCGAAGCCCCCTGCCTGGCTACCCAGGGGAG  
GAGCTGGAGGAGGAGGAGGAAAGGGGCGTGAAGCTCGGCCTGGGAGACTTCATCTTCTACAGCGTCTGG  
TGGGCAAGGCTGCAGCCACTGGCAACGGAGACTGGAACACTACGCTGGCCTGTTTTATCGCCATCCTCAT  
TGGCTTGTGTCTCACCCCTCCTGCTGCTTGTGTGTTCAAGAAGGCTCTGCCCGCCCTCCCCATCTCCATC  
ACCTTTGGACTCATCTTCTACTTCTCCACAGACAACCTGGTGC GGCCCTTTCATGGACACTCTGGCCTCCC  
ACCAGCTCTACATCTGA

>NM\_031087.2:98-1444 Rattus norvegicus presenilin 2 (Psen2), mRNA

ATGCTCACATTCATGGCCTCTGATAGCGAGGAAGAGGTGTGCGATGAGCGGACGTCCTTGATGTTCAGCCG  
AGAGCCCTACATCACGTTCTCCTGCCAGGACAGCAGGCCAGGCCAGAGGATGGAGAGAACAACACTGCCAGTG  
GAGGAGCCAGGAGAACGAGGACGACTGTGAGGAGGACCCGGACCACTATGCCTGCAGTGGGGTTCCTGGG  
CGACCATCGGGCCTGGAGGAGGAGCTGACCCTCAAGTATGGGGCGAAGCACGTGATCATGCTGTTTCGTGC  
CTGTACGCTGTGCATGATTGTGGTGGTGGCCACCATCAAGTCCGTGCGTTTTCTACACGGAGAAGAACGG  
GCAGCTCATCTACACGCCCTTCACCGAGGACACACCCTCTGTGGGCCAGCGGCTCCTCAACTCCGTGCTG  
AACACTCTGATCATGATCAGCGTCATTGTGGTTCATGACTATCTTCTAGTGGTACTCTACAAATATCGCT

GTTACAAGTTCATCCATGGCTGGCTGATCATGTCCTCCCTGATGCTCCTCTTCTTGTTCACCTACATCTA  
CCTCGGGGAAGTGTTCAGACCTACAATGTGGCCATGGACTACCCACACTGTTCTGGCTGTCTGGAAC  
TTCGGGGCAGTGGGCATGGTGTGCATCCACTGGAAGGGTCCCCTGGTGTCTCCAGCAGGCTTACCTCATTG  
TGATCAGCGCACTCATGGCCCTGGTGTTCATCAAGTACCTGCCGGAGTGGTCCGCTTGGGTTCATCTTGGG  
CGCCATCTCTGTGTACGATCTCGTGGCTGTGCTGTGCCCAAAGGGCCACTGAGGATGCTGGTGGAAACT  
GCCCAGGAAAGAAACGAGCCCATATTTCTGCCCTCATATACTCATCTGCCATGGTGTGGACGGTAGGCA  
TGGCGAAGCTGGACCCCTCCTCTCAGGGAGCACTGCAGCTCCCTTACGATCCAGAGATGGAAGAAGACTC  
CTATGACAGTTTTGGGGAACCCTCATAACCCTGAAGCCTTCGAAGCTCCCCAGCCTGGCTACCCAGGGGAA  
GAGCCGGAGGAGGAGGAGGAAAGGGGTGTAAAGCTTGGTCTGGGAGACTTCATCTTCTACAGCGTTCTGG  
TGGGCAAGGCAGCAGCCACAGGCAACGGAGACTGGAGCACGACGCTGGCCTGCTTTATCGCCATCCTCAT  
TGGCTTGTGTCTCACCCCTCCTGCTGCTCGCCGTGTTCAAGAAGGCCCTGCCCGCCCTCCCCATCTCCATC  
ACCTTCGGGCTCATCTTTTACTTCTCCACAGACAACCTGGTGCCTCTTTCATGGACACGTTGGCCTCCC  
ACCAGCTCTACATCTGA

>NM\_174440.4:267-1616 Bos taurus presenilin 2 (PSEN2), mRNA  
ATGCTCACATTCATGGCCTCTGACAGCGAGGAAGAAGTGTGTGATGAGCGGACGTCCCTGATGTCAGCCG  
AGAGCCCTACGCCGCGCTCCTGCCAGGACGGCCGGCAGGGCCTGGAGGACGGAGAGAGTGCCGCCAGTG  
GAGAAGCCAGGAGAGTGGAGGAGACCACGAGGAGGAGGACCCTGACCGCTACGTCTGCAGTGGGGTTCT  
GGGCGGCCGCCAGGCCTGGAGGAGGAGCTGACCCTCAAATACGGGGCAAAGCATGTGATCATGTTGTTTG  
TGCCTGTCACTGTGCATGATCGTGGTGGTGGCCACCATCAAGTCCGTGCGCTTCTACACAGAGAAGAA  
TGGACAGCTCATCTATACCCGTTCTCCGAGGACACGCCCTCAGTGGGCCAGCGGCTCCTCAACTCCGTG  
CTCAACACCCTCATCATGATCAGCGTCATTGTACCATGACGATCTTCTGGTGTGCTCTACAAGTACC  
GCTGCTACAAGTTCATCCACGGTTGGCTGATCATGTCCTCTCTGATGTTGCTCTTCTCTTACCTACAT  
CTACCTCGGGGAAGTGCTCAAGACCTACAATGTGGCCATGGACTACCCACCCTGTTCTGACCGTCTGG  
AACTTCGGGGCGGTGGGCATGGTGTGCATCCACTGGAAGGGCCCCCTAGTGTGCAGCAGGCCTACCTCA  
TCATGATCAGCGCGCTCATGGCCTTGGTGTTCATCAAGTACCTCCCGGAGTGGTCCGCCTGGGTCAATTCT  
GGGCGCCATCTCCGTGATGATCTTGTGGCTGTGCTGTATCCCAAAGGGCCACTGAGGATGCTCGTGGAA  
ACCGCGCAGGAGAGAATAAGCCCATATTTCCCTGCCCTCATATACTCATCCGCCATGGTGTGGACCTGG  
GCATGGCCAAGCTGGACCCCTTCTCTCAGGGAGCCCTTCACTCCCCTACGACCCGGAGATGGAAGAAGA  
CTCCTATGACAGTTTTGGGGAGCCCTCGTACCCTGACGTCTTTGAGCCCCCGCTGCCTGGCTACCCGGGG  
GAGGAGCTGGAGGAAGAGGAGGAAAGGGGCGTGAAGCTCGGCCTCGGAGACTTCATCTTCTACAGTGTGC  
TGGTGGGCAAGGCGGCCGCCACGGGCAGCGGGGACTGGAACACCACACTGGCCTGCTTTGTGGCCATCCT  
CATTGGTTTTGTGTCTGACCCTCCTGCTGCTCGCCGTGTTCAAGAAGGCGCTGCCCGCCCTCCCCATCTCC  
ATCACGTTCCGGGCTCATCTTCTACTTCTCCACGGACAACCTGGTGCGGCCTTTCATGGACACCCTGGCCT  
CCCATCAGCTCTACATCTGA

>XM\_003216065.3:183-1598 PREDICTED: Anolis carolinensis presenilin 2 (psen2),  
mRNA  
ATGATCACCTTCATGAACAACCTCTGACAGCGAAGAGGAATCCTGCAATGAAAGAACATCCCTGATGTCAG  
CGGAGAGCCCCCTCCTGCCTCCTTACCATGATGTCTCGCAAGCCCCTGCAGCAACTGAAACTCAGACACA  
TAGGAAAAGACGTACAGGAAGCAGTGGTTCTAACAAAACCTGCTGATGGAAATGTGCCTGAATCAGATGGT  
GCAACAAGAGGATCTGTTGCTCTGGACAATGTGGAGGAAGAAGTACCCTAAAATATGGAGCGAAACATG  
TGATCATGCTCTTTGTGCCTGTTACGCTATGTATGGTGTGGTAGTTGCCACCATAAAAATCAGTACGGTT  
CTATACAGAGAAGAACGGGCAACTGATTTATACCCCATTTAGTGAAGACACACCTTATGTTGGCCAGCGT  
CTCTTGAGCTCTGTGCTGAACACCCTCATCATGATCAGTGTCTATACTAGTAATGACAATTTTCTTGGTTG  
TGTTATATAAATACCGCTGCTACAAGTTCATTGATGTTGGCTGATTCTCTCATCTCTGATGCTTCTGTT  
CCTCTTACCTACATCTATCTAGGTGAAGTGTAAAGACCTACAATGTGGCAATGGATTACCCAACCCTG  
TTCTTTGTTATTTTGAATTTTGGAGCTGTTGGGATGATATGCATCCATTGGAAGGGACCCCTGCAACTCC  
AGCAAGCTTATCTCATCATGATCAGTGCCTTGATGGCTTTGGTTTTTCATCAAATACCTGCCTGAGTGGTC  
AGCCTGGGTCAATTCTGGGAGGCATTTCCATTTATGATCTGGTAGCAGTTTTATGCCCAAAGGGACCACTC  
CGAATGTTGGTAGAGACAGCACAAAGAGAGAAACGAACCCATATTTCCCTGCACTTATTTATTCCTCTGCTA  
TGATATGGACTGTAGGAATGGCAAAACCAGACAGTGGGCGAAGAGGATCTTCTGAAGAAACATGGGATCT  
AGCTGAAGGGGCTGAAAATCATCAGAATTCCTCATACTGATCCTGAAATTTCTGAGAGGAGGCACCTTA  
ACAGATGGTCAAGGCTGGCCAACGAGTTGAACAAAACCTGATCGACAACCTGGCCAAATGGGACACAACCTAG  
AAGAAATGGAGGAGGAAGAAGAGGTGTGAAGTTGGGACTTGGAGACTTCATCTTCTACAGCGTGTCTTGT

GGGCAAAGCAGCTGCAACTGCTAGTGGAGACTGGAATACAACCTTTGGCTTGTTTTGTAGCCATCCTCATA  
GGCCTTTGTTAAACCTTTTTATTGCTGGCAGTATTCAAGAAAGCATTGCCTGCCCTTCCTATCTCCATCA  
CCTTTGGCTTGATCTTCTACTTCTCAACAGACAACCTCGTACAACCTTTTATGGACTCTGGCAGCACA  
TCAGCTATATATTTAA

>NM\_001087742.1:116-1465 *Xenopus laevis* presenilin 2 S homeolog (psen2.S), mRNA

ATGATAAAACTCTCAGACAGCGAAGATGAGGAATGCAATGAGAGAACATCTTTGATCACATCAGAGAGTC  
CCCCTCTACCATCATAACCAAGATGGGGTCCAAGCCTCAGAAGGGCTGGAACTTCTTATCACAGGGAAAG  
ACAACCAGATAGTACACAGAATAATGAAGATGTACCTAATGGCAGAACATCTGGTGCAGATGCATATAAC  
AGTGAACACTACAGTGGAAAATGAGGAAGAAGAGTTGACTCTTAAATATGGTGTAGACATGTTATTATGC  
TCTTTGTCCCAGTCACTCTGTGCATGGTGGTGGTTGTTGCTACAATAAAATCTGTCCAGCTTCTACACAGA  
GAAAGATGGACAGCTAATCTACACGCCATTTTCTGAAGATACCACATCGGTTGGCGAGAGACTCTTAAAC  
TCTGTGCTTAATACTCTTATAATGATCAGTGTTATACTTGTGATGACCATATTCCTTGTGCTTCTTTATA  
AATATCGCTGTTATAAGTTTTATTCATGGATGGTTGATCCTCTCATCTTTAATGCTGCTTTTTTATGTTTAC  
ATATATATACCTCAGTGAAGTTTTCAAGACATAACAATAGCAATGGATTACCCAACCTTTGTTTCATGGTT  
ATATGGAATTTTGGGGCAGTAGGAATGATTTGCATTCACTGGAAGGGTCCCCTTCAGCTCCAGCAAGCTT  
ATCTCATCATGATAAGTGCACCTTATGGCTCTTGTCTTTATTAAGTATCTGCCAGAATGGTCCAGCATGGGT  
CATACTTGGAGCCATTTCTGTTTATGATCTGCTAGCAGTGCTTTGCCCTAAGGGTCTTTTGGAGGATGCTT  
GTAGAAACAGCACAAGAAAGAAATGAGCCCATATTTCTGCACCTCATATACTCCTCTGCCATGATGTGGA  
CAGTGGGAATGGCAGATTCGGCTACAGCAGATGGAAGAATGAATCAGCAAGTGCAGCATATAGACAGAAA  
CACACCTGAAGGTGCAAACAGCACAGTGGAGGACGCTGCAGAGACCAGGATTCAAACACAAAGTAATCTC  
TCTTCTGAGGATCCAGATGAGGAAAGAGGAGTGAAGCTTGGTCTTGGAGACTTCATATTCTACAGTGTGC  
TAGTTGGAAAAGCAGCTGCAACTGCAAGCGGAGACTGGAATACCACATTGGCTTGTTTTGTGGCCATTTT  
AATAGGTTTTATGTCTGACGCTGTTGTTGCTGGCAGTTTTCAAGAAAGCTCTCCCTGCCCTACCGATTTCT  
ATCACCTTTGGTTTTGATCTTCTACTTTTCTACAGATAATATAGTACGCCCTTTCATGGACACCCTTGCAT  
CCCACCAAATGTACATTTAG

>NM\_131514.2:115-1440 *Danio rerio* presenilin 2 (psen2), mRNA

ATGAATACCTCAGACAGTGAAGAGGACTCCTACAACGAGAGGTCCGCTCTGGTCCAGTCCGAAAGCCCAA  
CCGTGCCCTCATAACAACCAAGACAATGCCATGTCTCTCCCCAGGACACAGACAGCAAACGGAGCGGTGC  
GGTCCGCTCGAGGTCCGCCTCGGGCTCTGGAGATGCCGGGCCGGTGGACAGAGAGCGCGCAGACACCCT  
GATGGAGAGGAAGAGGAGCTCACACTCAAATACGGCGCGAAACACGTCATCATGCTCTTCATCCCTGTCA  
CGCTCTGCATGGTGGTTCGTAGTGGCCACGATCAAGTCCGTCAGTTTTCTACACCGAGAAGAGCGGACAGCG  
GCTCATCTATAACCCATTTGAAGAAGACCCGAACCTCAGTGGGCCAGCGTCTGCTGAATTCTGTGCTCAAC  
ACTCTGGTTCATGATCAGTGTGATTGTCTTCATGACCATCATCCTGGTGTGCTCTACAAGTACCGCTGCT  
ATAAATTTATTCACGGCTGGCTGATTCTATCCTCGCTGATGCTGCTCTTCTGGTTTTAGCTTCATGTATCT  
GGGAGAGGTCTTCAAGACATATAATGTGGCGATGGATTATCCGACGCTGGTGTGATGATCATCTGGAACCTC  
GGTGTGGTGGGAATGATCTGCATCCACTGGAAGGGTCCGCTGCGGCTCCAGCAGGCGTATCTCATCGTCA  
TCAGTGCCCTCATGGCCCTCATCTTCATTAATAACCTGCCCGAGTGGTCCGCCTGGGTTCATCCTGGGAGC  
CATCTCTATATACGATCTGATTGCGGTGTTGTGTCCGAAAGGCCCGTTGAGGATGCTGGTGGAAACAGCT  
CAAGAAAGAAATGAGCCCATTTTCCCTGCGCTCATATATTCATCTGCCATGGTCTGGATGGTTGGAATGG  
CTGACTCTAATAATCCAGATTCAGCTGGTGAAGGGCGGCGCAGTGGGGGCGGAGTAAGGACACAGGAAGG  
GGTGGAGTCAGAGGATGATGCGCCTCAGGCAGGGAGGAGGCAGTATTCAGCAGAAGAGGACCTGGAGGAA  
GACCGAGGAGTGAAGCTGGGGCTGGGAGACTTCATCTTCTACAGTGTACTGGTGGGTAAAGCAGCGGCGA  
CTGGAGGAGACTGGAACACCACACTGGCCTGCTTTGTGGCCATCCTCATCGGTCTGTGTCTGACGCTCCT  
CCTGCTGGCCATCTTCAAGAAGGCTCTTCCGGCTCTGCCATCTCCATCACCTTCGGCCTGGTCTTCTAC  
TTCTCCACAGATAATCTGGTGGCCCTTTCATGGACAGCCTGGCAGCACATCAGTACTACATCTGA

>XM\_003972249.2:145-1419 PREDICTED: *Takifugu rubripes* presenilin 2 (psen2), transcript variant X1, mRNA

ATGAACTCCTCAGACAGTGTGATGACTCCTACAACGAGAGGTCCAGCACTGGTTCATCACAGAACCCAG  
CAGTACCTTCCTATAGGCCGACCGTTGATCCAAGGTCGCCATAGCCCAGCCATGCAAGCAGATGGCAGG  
AAACAGAAGAGAGGGACCACCTGACAGCGGGGGTTTCAGACCAGGACATAGACATGGATGATGAGGAGCTT  
ACTCTTAAGTATGGAGCCAAACACGTGATCATGCTCTTCAATCCCGTACCCTCTGCATGGTGGTTGTGG  
TCACCACCATCAAGTCACTCAGCTTCTATTTCAGAGAAGAGCGACCAGCAGCTGATCTACACGCCATTTAC  
TGAGAACACGTATCTGTTGGCCGCGGCTCCTCAACTCCGTCCTTAACACCATCATCATGATCAGTGTG  
ATTGTGGTTCATGACTATCTTCTGGTTGTCTCTATAAATACCGCTGCTACAAGTTCATCCACGGTTGGC



TCATCCTGTCCTCGCTCATGCTGCTCTTCTGGTTTCAGCTTCATGTACCTCGGTGAGGTCTTTAAAACGTA  
CAACGTGGCAATGGACTACCCTACAGTGGGGTTGCTGATCTGGAATTTTGGGGCGGTGGGTATGATCTGC  
ATTCAGTGGAAAGGCCCCCTGCAGCTGCAGCAGATCTACCTGATCCTCATCAGCGCCCTCATGGCGCTCG  
TCTTCATCAAGTATCTGCCTGAGTGGTCGGCCTGGGTTCATCCTGGGAGCCATCTCCGTTTACGACCTGGT  
GGCCGTCTGTGCCCCAAAGGTCTCTCCGGATGTTGGTAGAGACGGCTCAGGAACGGAACGAGCCCATC  
TTTCCTGCTCTCATTACTCCTCTGCCATGATGTGGGCGGTGGGGATGGCCAAACCAGTGGATGCTCCAC  
ATTCTGGACGCGAAACAGACGAGGAAGTGATGCAGAGCTGCACAGAGCAGTTGAGTCCACACTCACCTGC  
AGAGACCGAGCCGGAGACAGACCGAGGTGTGAAGCTCGGCCTTGGAGATTTTCATCTTCTACAGTGTCTG  
GTGGGAAAAGCTGCAGCAACTGGTGGAGATTGGAACACTACACTGGCCTGCTTTGTTGCCATTCTGATTG  
GTCTGTGTCTGACGCTGCTGTTGTTGGCCATCTTTAAGAAGGCTCTACCAGCGCTGCCCATCTCCATCAC  
CTTTGGCCTGATCTTCTACTTCTCTACTGACTTCCTCGTCCAACCTTTTATGGACAACCTGGCTGCTCAC  
CAGTTTTTATATCTGA

**Supplementary File 4**

| <b>Paralogs of Gamma Secretase proteins</b> |                               |                       |            |                  |              |
|---------------------------------------------|-------------------------------|-----------------------|------------|------------------|--------------|
| <b>Group</b>                                | <b>Species</b>                | <b>No of paralogs</b> |            |                  |              |
|                                             |                               | <b>Presenilin</b>     | <b>APH</b> | <b>Nicastrin</b> | <b>PEN-2</b> |
| <b>Mammals</b>                              | Homo sapiens                  | 2                     | 2          | 1                | 1            |
|                                             | Mus musculus                  | 2                     | 3          | 1                | 1            |
| <b>Birds</b>                                | Galus galus                   | 2                     | 2          | 1                | 0            |
| <b>Reptiles</b>                             | Anolis lizard                 | 2                     | 2          | 1                | 1            |
| <b>Amphibians</b>                           | Xenopus                       | 2                     | 1          | 2                | 2            |
| <b>Fish</b>                                 | Danio rerio                   | 2                     | 2          | 1                | 1            |
|                                             | Latimeria chalumnae           | 2                     | 3          | 1                | 1            |
|                                             | Lethenteron japonicum         | 1                     | 2          | 1                | 0            |
| <b>Non-vertebrate chordates</b>             | Caenorhabditis elegans        | 3                     | 1          | 1                | 1            |
|                                             | Branchiostoma floridae        | 1                     | 1          | 1                | 1            |
|                                             | Saccoglossus kowalevskii      | 1                     | 1          | 1                | 1            |
| <b>Invertebrates</b>                        | Strongylocentrotus purpuratus | 1                     | 1          | 1                | 1            |
|                                             | Drosophila melanogaster       | 1                     | 1          | 1                | 1            |
|                                             | Hydra vulgaris                | 2                     | 1          | 1                | 1            |
|                                             | Amphimedon queenslandica      | 1                     | 1          | 1                | 1            |
|                                             | Monosiga brevicollis          | 1                     | 1          | 1                |              |
| Dictyostelium discoideum                    | 2                             | 1                     | 1          | 1                |              |
| Chondrus crispus                            | 1                             | 0                     | 0          | 0                |              |
| Trypanosoma brucei                          | 1                             | 0                     | 0          | 1                |              |
| Naegleria gruberi                           | 0                             | 0                     | 0          | 0                |              |
| Trichomonas vaginalis                       | 3                             | 0                     | 1          | 0                |              |
| Rozella allomycis                           | 1                             | 0                     | 1          | 0                |              |
| Fonticula alba                              | 2                             | 1                     | 1          | 1                |              |
| Batrachochytrium salamandrivorans           | 1                             | 1                     | 1          | 1                |              |
| Capsaspora owczarzaki                       | 1                             | 1                     | 1          | 1                |              |
| Neospora caninum Liverpool                  | 1                             | 0                     | 0          | 1                |              |
| Toxoplasma gondii                           | 1                             | 0                     | 0          | 1                |              |
| Hammondia hammondi                          | 1                             | 0                     | 0          | 1                |              |
| Blastocystis hominis                        | 1                             | 0                     | 0          | 1                |              |
| Aphanomyces invadans                        | 4                             | 1                     | 1          | 1                |              |
| Saprolegnia diclina                         | 3                             | 0                     | 1          | 1                |              |

|                 |                             |   |   |   |   |
|-----------------|-----------------------------|---|---|---|---|
| <b>Protists</b> | Thalassiosira pseudonana    | 2 | 0 | 1 | 0 |
|                 | Phaeodactylum tricornutum   | 2 | 0 | 0 | 1 |
|                 | Ectocarpus siliculosus      | 1 | 1 | 1 | 0 |
|                 | Aureococcus anophagefferens | 1 | 0 | 0 | 1 |
|                 | Nannochloropsis gaditana    | 1 | 0 | 1 | 0 |
|                 | Bigelowiella natans         | 1 | 0 | 0 | 0 |
|                 | Reticulomyxa filose         | 1 | 0 | 1 | 0 |
|                 | Entamoeba histolytica       | 1 | 1 | 0 | 1 |
|                 | Polysphondylium pallidum    | 2 | 1 | 1 | 1 |
|                 | Guillardia theta            | 1 | 1 | 1 | 0 |
|                 | Emiliana huxleyi            | 2 | 1 | 0 | 0 |
|                 | Chrysochromulina            | 1 | 0 | 1 | 1 |

Supplementary File 5

SLAC Method for sliding window analysis of selection

PSN1

| Codon | Observed S Changes | Observed NS Changes | E[S Sites] | E[NS Sites] | Observed S. Prop. | P{S} | dS   | dN   | dN-dS | P{NS >= observed } | P{NS <= observed } | Normalized dN-dS |
|-------|--------------------|---------------------|------------|-------------|-------------------|------|------|------|-------|--------------------|--------------------|------------------|
| 1     | 0                  | 0                   | 0          | 0.77        | 0                 | 0    | 0    | 0    | 0     | 0                  | 0                  | 0                |
| 2     | 0                  | 1                   | 0.9        | 1.86        | 0                 | 0.33 | 0    | 0.54 | 0.54  | 0.67               | 0.33               | 0.41             |
| 3     | 2                  | 2                   | 1          | 2.24        | 0.5               | 0.31 | 2    | 0.89 | -1.11 | 0.91               | 0.36               | -0.85            |
| 4     | 1                  | 3                   | 0.7        | 3.82        | 0.25              | 0.15 | 1.43 | 0.79 | -0.65 | 0.88               | 0.49               | -0.5             |
| 5     | 2                  | 3                   | 0.46       | 3.95        | 0.4               | 0.1  | 4.39 | 0.76 | -3.63 | 0.99               | 0.09               | -2.79            |
| 6     | 0                  | 5                   | 1.46       | 3.05        | 0                 | 0.32 | 0    | 1.64 | 1.64  | 0.14               | 0.86               | 1.26             |
| 7     | 0                  | 0                   | 0          | 0           | 0                 | 0    | 0    | 0    | 0     | 0                  | 0                  | 0                |
| 8     | 2                  | 0                   | 1.51       | 2.61        | 1                 | 0.37 | 1.33 | 0    | -1.33 | 1                  | 0.13               | -1.02            |
| 9     | 1                  | 0                   | 0.8        | 3.71        | 1                 | 0.18 | 1.24 | 0    | -1.24 | 1                  | 0.18               | -0.96            |
| 10    | 1                  | 0                   | 0.8        | 3.71        | 1                 | 0.18 | 1.24 | 0    | -1.24 | 1                  | 0.18               | -0.96            |
| 11    | 1                  | 1                   | 0.8        | 3.37        | 0.5               | 0.19 | 1.24 | 0.3  | -0.95 | 0.96               | 0.35               | -0.73            |
| 12    | 1                  | 2                   | 0.8        | 3.39        | 0.33              | 0.19 | 1.25 | 0.59 | -0.66 | 0.91               | 0.47               | -0.51            |
| 13    | 2                  | 1                   | 0.81       | 3.43        | 0.67              | 0.19 | 2.47 | 0.29 | -2.17 | 0.99               | 0.1                | -1.67            |
| 14    | 1.33               | 4.67                | 1.47       | 3.03        | 0.22              | 0.33 | 0.91 | 1.54 | 0.63  | 0.47               | 0.82               | 0.49             |
| 15    | 2                  | 1                   | 0.8        | 3.3         | 0.67              | 0.2  | 2.49 | 0.3  | -2.18 | 0.99               | 0.1                | -1.68            |
| 16    | 1                  | 1                   | 0.8        | 3.71        | 0.5               | 0.18 | 1.24 | 0.27 | -0.97 | 0.97               | 0.32               | -0.75            |
| 17    | 1                  | 0                   | 0.78       | 3.37        | 1                 | 0.19 | 1.28 | 0    | -1.28 | 1                  | 0.19               | -0.99            |
| 18    | 2                  | 0                   | 1.41       | 3.03        | 1                 | 0.32 | 1.42 | 0    | -1.42 | 1                  | 0.1                | -1.09            |
| 19    | 3                  | 1                   | 1.51       | 2.88        | 0.75              | 0.34 | 1.99 | 0.35 | -1.64 | 0.99               | 0.12               | -1.27            |
| 20    | 3                  | 1                   | 1.51       | 3.01        | 0.75              | 0.33 | 1.99 | 0.33 | -1.66 | 0.99               | 0.11               | -1.28            |
| 21    | 3                  | 0                   | 2.21       | 2.26        | 1                 | 0.49 | 1.36 | 0    | -1.36 | 1                  | 0.12               | -1.04            |
| 22    | 2                  | 2                   | 0.42       | 4.1         | 0.5               | 0.09 | 4.78 | 0.49 | -4.29 | 1                  | 0.05               | -3.3             |
| 23    | 2                  | 3                   | 1.47       | 2.53        | 0.4               | 0.37 | 1.36 | 1.19 | -0.17 | 0.74               | 0.6                | -0.13            |
| 24    | 4                  | 2                   | 1.51       | 2.66        | 0.67              | 0.36 | 2.66 | 0.75 | -1.9  | 0.97               | 0.13               | -1.47            |
| 25    | 1                  | 1                   | 0.78       | 3.35        | 0.5               | 0.19 | 1.28 | 0.3  | -0.98 | 0.96               | 0.34               | -0.76            |
| 26    | 1                  | 1                   | 0.8        | 3.71        | 0.5               | 0.18 | 1.24 | 0.27 | -0.97 | 0.97               | 0.32               | -0.75            |
| 27    | 3                  | 0                   | 1.51       | 3.01        | 1                 | 0.33 | 1.99 | 0    | -1.99 | 1                  | 0.04               | -1.53            |
| 28    | 4                  | 3                   | 1.52       | 3           | 0.57              | 0.34 | 2.63 | 1    | -1.63 | 0.95               | 0.18               | -1.26            |
| 29    | 4                  | 3                   | 1.82       | 2.65        | 0.57              | 0.41 | 2.2  | 1.13 | -1.07 | 0.9                | 0.3                | -0.82            |
| 30    | 4                  | 1                   | 1.51       | 3.01        | 0.8               | 0.33 | 2.66 | 0.33 | -2.32 | 1                  | 0.05               | -1.79            |

|    |      |      |      |      |      |      |      |      |       |      |      |       |
|----|------|------|------|------|------|------|------|------|-------|------|------|-------|
| 31 | 3    | 1    | 1.51 | 2.94 | 0.75 | 0.34 | 1.99 | 0.34 | -1.65 | 0.99 | 0.12 | -1.27 |
| 32 | 1    | 1    | 0.8  | 3.16 | 0.5  | 0.2  | 1.24 | 0.32 | -0.93 | 0.96 | 0.37 | -0.71 |
| 33 | 1    | 3    | 0.71 | 2.76 | 0.25 | 0.21 | 1.4  | 1.09 | -0.31 | 0.81 | 0.6  | -0.24 |
| 34 | 1    | 4    | 0.73 | 3.33 | 0.2  | 0.18 | 1.37 | 1.2  | -0.16 | 0.78 | 0.63 | -0.13 |
| 35 | 1    | 3    | 1.33 | 2.78 | 0.25 | 0.32 | 0.75 | 1.08 | 0.32  | 0.61 | 0.79 | 0.25  |
| 36 | 1.83 | 6.17 | 1.2  | 3.3  | 0.23 | 0.27 | 1.53 | 1.87 | 0.34  | 0.58 | 0.71 | 0.26  |
| 37 | 3    | 3    | 1.03 | 2.94 | 0.5  | 0.26 | 2.9  | 1.02 | -1.88 | 0.96 | 0.19 | -1.45 |
| 38 | 0.5  | 3.5  | 1.45 | 3.07 | 0.12 | 0.32 | 0.35 | 1.14 | 0.79  | 0.41 | 0.79 | 0.61  |
| 39 | 4    | 5    | 1.51 | 2.98 | 0.44 | 0.34 | 2.64 | 1.68 | -0.96 | 0.85 | 0.36 | -0.74 |
| 40 | 2    | 4    | 0.87 | 3.39 | 0.33 | 0.2  | 2.29 | 1.18 | -1.11 | 0.9  | 0.36 | -0.86 |
| 41 | 4.5  | 3.5  | 1.24 | 3.26 | 0.56 | 0.28 | 3.62 | 1.07 | -2.55 | 0.98 | 0.1  | -1.96 |
| 42 | 2.5  | 5.5  | 1.32 | 3.03 | 0.31 | 0.3  | 1.9  | 1.81 | -0.08 | 0.67 | 0.6  | -0.06 |
| 43 | 1    | 3    | 0.83 | 3.35 | 0.25 | 0.2  | 1.2  | 0.9  | -0.3  | 0.82 | 0.59 | -0.23 |
| 44 | 3    | 4    | 1.24 | 3.28 | 0.43 | 0.27 | 2.41 | 1.22 | -1.19 | 0.9  | 0.3  | -0.92 |
| 45 | 3.5  | 7.5  | 1.4  | 3.09 | 0.32 | 0.31 | 2.49 | 2.43 | -0.07 | 0.65 | 0.59 | -0.05 |
| 46 | 2    | 5    | 1.44 | 3.05 | 0.29 | 0.32 | 1.38 | 1.64 | 0.26  | 0.6  | 0.71 | 0.2   |
| 47 | 2    | 2    | 0.79 | 3.15 | 0.5  | 0.2  | 2.54 | 0.63 | -1.91 | 0.97 | 0.18 | -1.47 |
| 48 | 2    | 2    | 0.95 | 2.97 | 0.5  | 0.24 | 2.1  | 0.67 | -1.42 | 0.95 | 0.25 | -1.09 |
| 49 | 1    | 3    | 0.96 | 2.9  | 0.25 | 0.25 | 1.04 | 1.04 | 0     | 0.74 | 0.68 | 0     |
| 50 | 2    | 3    | 0.87 | 3.16 | 0.4  | 0.22 | 2.3  | 0.95 | -1.35 | 0.93 | 0.3  | -1.04 |
| 51 | 1.5  | 3.5  | 0.79 | 2.69 | 0.3  | 0.23 | 1.9  | 1.3  | -0.6  | 0.8  | 0.52 | -0.46 |
| 52 | 2    | 4    | 1.1  | 2.88 | 0.33 | 0.28 | 1.82 | 1.39 | -0.43 | 0.79 | 0.53 | -0.33 |
| 53 | 3    | 5    | 1.07 | 3.02 | 0.38 | 0.26 | 2.8  | 1.65 | -1.15 | 0.87 | 0.35 | -0.89 |
| 54 | 2.5  | 4.5  | 0.9  | 3.04 | 0.36 | 0.23 | 2.78 | 1.48 | -1.29 | 0.87 | 0.35 | -1    |
| 55 | 2    | 5    | 0.91 | 3.06 | 0.29 | 0.23 | 2.19 | 1.63 | -0.56 | 0.8  | 0.5  | -0.43 |
| 56 | 1    | 5    | 0.8  | 3.26 | 0.17 | 0.2  | 1.25 | 1.53 | 0.29  | 0.66 | 0.73 | 0.22  |
| 57 | 1    | 1    | 0.32 | 1.48 | 0.5  | 0.18 | 3.12 | 0.68 | -2.45 | 0.97 | 0.32 | -1.88 |
| 58 | 1.5  | 4.5  | 0.75 | 2.66 | 0.25 | 0.22 | 2.01 | 1.69 | -0.32 | 0.74 | 0.58 | -0.25 |
| 59 | 2    | 1    | 0.62 | 2.69 | 0.67 | 0.19 | 3.21 | 0.37 | -2.84 | 0.99 | 0.09 | -2.18 |
| 60 | 0    | 2    | 0.62 | 2.69 | 0    | 0.19 | 0    | 0.74 | 0.74  | 0.66 | 0.34 | 0.57  |
| 61 | 0.5  | 1.5  | 0.53 | 2.25 | 0.25 | 0.19 | 0.94 | 0.67 | -0.27 | 0.81 | 0.35 | -0.21 |
| 62 | 2.67 | 4.33 | 1.48 | 3.04 | 0.38 | 0.33 | 1.81 | 1.42 | -0.38 | 0.75 | 0.52 | -0.29 |
| 63 | 3    | 3    | 0.97 | 3.54 | 0.5  | 0.22 | 3.09 | 0.85 | -2.24 | 0.98 | 0.12 | -1.72 |
| 64 | 1.33 | 4.67 | 1.46 | 3.03 | 0.22 | 0.32 | 0.92 | 1.54 | 0.63  | 0.48 | 0.81 | 0.48  |
| 65 | 4    | 6    | 0.89 | 3.34 | 0.4  | 0.21 | 4.5  | 1.8  | -2.7  | 0.96 | 0.14 | -2.08 |
| 66 | 3    | 4    | 1.49 | 2.94 | 0.43 | 0.34 | 2.01 | 1.36 | -0.65 | 0.82 | 0.44 | -0.5  |

|     |      |      |      |      |      |      |      |      |       |      |      |       |
|-----|------|------|------|------|------|------|------|------|-------|------|------|-------|
| 67  | 2.5  | 6.5  | 0.96 | 3.32 | 0.28 | 0.23 | 2.59 | 1.96 | -0.64 | 0.77 | 0.48 | -0.49 |
| 68  | 2.5  | 3.5  | 1.21 | 3.28 | 0.42 | 0.27 | 2.07 | 1.07 | -1    | 0.87 | 0.36 | -0.77 |
| 69  | 2.33 | 3.67 | 1.46 | 3.03 | 0.39 | 0.33 | 1.6  | 1.21 | -0.39 | 0.77 | 0.52 | -0.3  |
| 70  | 3    | 4    | 1.47 | 3.05 | 0.43 | 0.33 | 2.04 | 1.31 | -0.73 | 0.84 | 0.41 | -0.56 |
| 71  | 3    | 3    | 1.51 | 3.01 | 0.5  | 0.33 | 1.98 | 1    | -0.98 | 0.9  | 0.32 | -0.76 |
| 72  | 0    | 0    | 0    | 0    | 0    | 0    | 0    | 0    | 0     | 0    | 0    | 0     |
| 73  | 0    | 0    | 0    | 0    | 0    | 0    | 0    | 0    | 0     | 0    | 0    | 0     |
| 74  | 0    | 0    | 0    | 0    | 0    | 0    | 0    | 0    | 0     | 0    | 0    | 0     |
| 75  | 3    | 3    | 1.42 | 3.1  | 0.5  | 0.31 | 2.11 | 0.97 | -1.14 | 0.92 | 0.28 | -0.88 |
| 76  | 2    | 5    | 1.45 | 2.73 | 0.29 | 0.35 | 1.38 | 1.83 | 0.45  | 0.54 | 0.76 | 0.35  |
| 77  | 0    | 0    | 0    | 0    | 0    | 0    | 0    | 0    | 0     | 0    | 0    | 0     |
| 78  | 0    | 0    | 0    | 0    | 0    | 0    | 0    | 0    | 0     | 0    | 0    | 0     |
| 79  | 0    | 0    | 0    | 0    | 0    | 0    | 0    | 0    | 0     | 0    | 0    | 0     |
| 80  | 0    | 0    | 0    | 0    | 0    | 0    | 0    | 0    | 0     | 0    | 0    | 0     |
| 81  | 0    | 0    | 0    | 0    | 0    | 0    | 0    | 0    | 0     | 0    | 0    | 0     |
| 82  | 4    | 5    | 1.44 | 3.06 | 0.44 | 0.32 | 2.78 | 1.63 | -1.15 | 0.88 | 0.32 | -0.88 |
| 83  | 0    | 0    | 0    | 0    | 0    | 0    | 0    | 0    | 0     | 0    | 0    | 0     |
| 84  | 0    | 0    | 0    | 0    | 0    | 0    | 0    | 0    | 0     | 0    | 0    | 0     |
| 85  | 0    | 0    | 0    | 0    | 0    | 0    | 0    | 0    | 0     | 0    | 0    | 0     |
| 86  | 0    | 0    | 0    | 0    | 0    | 0    | 0    | 0    | 0     | 0    | 0    | 0     |
| 87  | 0    | 0    | 0    | 0    | 0    | 0    | 0    | 0    | 0     | 0    | 0    | 0     |
| 88  | 0    | 0    | 0    | 0    | 0    | 0    | 0    | 0    | 0     | 0    | 0    | 0     |
| 89  | 2.5  | 7.5  | 1.1  | 3.33 | 0.25 | 0.25 | 2.26 | 2.25 | -0.01 | 0.65 | 0.61 | -0.01 |
| 90  | 2.5  | 4.5  | 1.34 | 3.15 | 0.36 | 0.3  | 1.86 | 1.43 | -0.43 | 0.76 | 0.51 | -0.33 |
| 91  | 0.5  | 3.5  | 1.72 | 2.78 | 0.12 | 0.38 | 0.29 | 1.26 | 0.97  | 0.32 | 0.86 | 0.75  |
| 92  | 0    | 0    | 0    | 0    | 0    | 0    | 0    | 0    | 0     | 0    | 0    | 0     |
| 93  | 0    | 0    | 0    | 0    | 0    | 0    | 0    | 0    | 0     | 0    | 0    | 0     |
| 94  | 0    | 0    | 0    | 0    | 0    | 0    | 0    | 0    | 0     | 0    | 0    | 0     |
| 95  | 2    | 1    | 0.78 | 3.39 | 0.67 | 0.19 | 2.55 | 0.3  | -2.25 | 0.99 | 0.09 | -1.73 |
| 96  | 3    | 0    | 0.81 | 3.34 | 1    | 0.19 | 3.7  | 0    | -3.7  | 1    | 0.01 | -2.85 |
| 97  | 1    | 0    | 0.78 | 3.37 | 1    | 0.19 | 1.28 | 0    | -1.28 | 1    | 0.19 | -0.99 |
| 98  | 3    | 0    | 2.19 | 2.31 | 1    | 0.49 | 1.37 | 0    | -1.37 | 1    | 0.12 | -1.05 |
| 99  | 3    | 0    | 1.51 | 3.01 | 1    | 0.33 | 1.99 | 0    | -1.99 | 1    | 0.04 | -1.53 |
| 100 | 3    | 0    | 1.55 | 2.97 | 1    | 0.34 | 1.94 | 0    | -1.94 | 1    | 0.04 | -1.49 |
| 101 | 2    | 0    | 0.82 | 3.38 | 1    | 0.19 | 2.45 | 0    | -2.45 | 1    | 0.04 | -1.89 |
| 102 | 2    | 0    | 0.8  | 3.01 | 1    | 0.21 | 2.49 | 0    | -2.49 | 1    | 0.04 | -1.91 |



|     |     |     |      |      |      |      |      |      |       |      |      |       |
|-----|-----|-----|------|------|------|------|------|------|-------|------|------|-------|
| 139 | 3   | 0   | 1.63 | 2.89 | 1    | 0.36 | 1.85 | 0    | -1.85 | 1    | 0.05 | -1.42 |
| 140 | 1   | 0   | 1.13 | 3.39 | 1    | 0.25 | 0.89 | 0    | -0.89 | 1    | 0.25 | -0.68 |
| 141 | 3   | 0   | 0.8  | 3.01 | 1    | 0.21 | 3.73 | 0    | -3.73 | 1    | 0.01 | -2.87 |
| 142 | 3   | 0   | 1.51 | 3.01 | 1    | 0.33 | 1.99 | 0    | -1.99 | 1    | 0.04 | -1.53 |
| 143 | 2   | 0   | 1.51 | 3.01 | 1    | 0.33 | 1.33 | 0    | -1.33 | 1    | 0.11 | -1.02 |
| 144 | 1   | 0   | 0.8  | 3.71 | 1    | 0.18 | 1.24 | 0    | -1.24 | 1    | 0.18 | -0.96 |
| 145 | 3.5 | 5.5 | 1.44 | 3.07 | 0.39 | 0.32 | 2.44 | 1.79 | -0.65 | 0.78 | 0.45 | -0.5  |
| 146 | 2   | 0   | 0.8  | 3.35 | 1    | 0.19 | 2.49 | 0    | -2.49 | 1    | 0.04 | -1.92 |
| 147 | 1   | 1   | 0.8  | 3.71 | 0.5  | 0.18 | 1.24 | 0.27 | -0.97 | 0.97 | 0.32 | -0.75 |
| 148 | 4   | 1   | 1.51 | 3.01 | 0.8  | 0.33 | 2.66 | 0.33 | -2.32 | 1    | 0.05 | -1.79 |
| 149 | 3   | 5   | 1.47 | 3.03 | 0.38 | 0.33 | 2.04 | 1.65 | -0.39 | 0.75 | 0.52 | -0.3  |
| 150 | 5   | 1   | 1.48 | 2.71 | 0.83 | 0.35 | 3.37 | 0.37 | -3    | 1    | 0.02 | -2.31 |
| 151 | 2   | 0   | 1.51 | 3.01 | 1    | 0.33 | 1.33 | 0    | -1.33 | 1    | 0.11 | -1.02 |
| 152 | 0   | 0   | 1.51 | 3.01 | 0    | 0.33 | 0    | 0    | 0     | 0    | 0    | 0     |
| 153 | 0.5 | 2.5 | 0.82 | 2.97 | 0.17 | 0.22 | 0.61 | 0.84 | 0.23  | 0.68 | 0.52 | 0.18  |
| 154 | 5   | 0   | 1.74 | 2.75 | 1    | 0.39 | 2.87 | 0    | -2.87 | 1    | 0.01 | -2.21 |
| 155 | 1   | 0   | 1.55 | 2.97 | 1    | 0.34 | 0.65 | 0    | -0.65 | 1    | 0.34 | -0.5  |
| 156 | 4   | 0   | 1.79 | 2.63 | 1    | 0.41 | 2.23 | 0    | -2.23 | 1    | 0.03 | -1.72 |
| 157 | 1   | 1   | 0.8  | 3.71 | 0.5  | 0.18 | 1.24 | 0.27 | -0.97 | 0.97 | 0.32 | -0.75 |
| 158 | 2   | 0   | 1.51 | 3.01 | 1    | 0.33 | 1.33 | 0    | -1.33 | 1    | 0.11 | -1.02 |
| 159 | 1   | 0   | 1.51 | 3.01 | 1    | 0.33 | 0.66 | 0    | -0.66 | 1    | 0.33 | -0.51 |
| 160 | 5   | 0   | 1.83 | 2.69 | 1    | 0.41 | 2.73 | 0    | -2.73 | 1    | 0.01 | -2.1  |
| 161 | 1   | 0   | 0.8  | 3.71 | 1    | 0.18 | 1.24 | 0    | -1.24 | 1    | 0.18 | -0.96 |
| 162 | 3   | 0   | 1.51 | 3.01 | 1    | 0.33 | 1.99 | 0    | -1.99 | 1    | 0.04 | -1.53 |
| 163 | 3   | 1   | 1.54 | 2.98 | 0.75 | 0.34 | 1.95 | 0.34 | -1.62 | 0.99 | 0.12 | -1.24 |
| 164 | 1   | 1   | 1.12 | 3.4  | 0.5  | 0.25 | 0.89 | 0.29 | -0.6  | 0.94 | 0.43 | -0.46 |
| 165 | 0   | 0   | 0    | 4.52 | 0    | 0    | 0    | 0    | 0     | 0    | 0    | 0     |
| 166 | 0   | 0   | 1.13 | 3.39 | 0    | 0.25 | 0    | 0    | 0     | 0    | 0    | 0     |
| 167 | 1   | 0   | 0.8  | 3.71 | 1    | 0.18 | 1.24 | 0    | -1.24 | 1    | 0.18 | -0.96 |
| 168 | 2   | 0   | 1.51 | 3.01 | 1    | 0.33 | 1.33 | 0    | -1.33 | 1    | 0.11 | -1.02 |
| 169 | 3   | 0   | 1.01 | 3.5  | 1    | 0.22 | 2.96 | 0    | -2.96 | 1    | 0.01 | -2.27 |
| 170 | 5   | 1   | 1.67 | 2.85 | 0.83 | 0.37 | 3    | 0.35 | -2.65 | 1    | 0.03 | -2.04 |
| 171 | 3   | 3   | 1.47 | 3.05 | 0.5  | 0.33 | 2.04 | 0.98 | -1.06 | 0.91 | 0.3  | -0.82 |
| 172 | 0   | 0   | 0    | 4.52 | 0    | 0    | 0    | 0    | 0     | 0    | 0    | 0     |
| 173 | 4   | 0   | 1.51 | 3.01 | 1    | 0.33 | 2.66 | 0    | -2.66 | 1    | 0.01 | -2.04 |
| 174 | 2   | 0   | 1.1  | 3.42 | 1    | 0.24 | 1.82 | 0    | -1.82 | 1    | 0.06 | -1.4  |



|     |   |   |      |      |      |      |      |      |       |      |      |       |
|-----|---|---|------|------|------|------|------|------|-------|------|------|-------|
| 175 | 0 | 1 | 0.82 | 3.7  | 0    | 0.18 | 0    | 0.27 | 0.27  | 0.82 | 0.18 | 0.21  |
| 176 | 5 | 0 | 2.19 | 2.3  | 1    | 0.49 | 2.28 | 0    | -2.28 | 1    | 0.03 | -1.76 |
| 177 | 3 | 0 | 1.51 | 3.01 | 1    | 0.33 | 1.99 | 0    | -1.99 | 1    | 0.04 | -1.53 |
| 178 | 3 | 2 | 1.56 | 2.96 | 0.6  | 0.35 | 1.92 | 0.68 | -1.24 | 0.95 | 0.23 | -0.96 |
| 179 | 2 | 1 | 1.51 | 2.98 | 0.67 | 0.34 | 1.32 | 0.34 | -0.99 | 0.96 | 0.26 | -0.76 |
| 180 | 2 | 0 | 0.8  | 3.01 | 1    | 0.21 | 2.49 | 0    | -2.49 | 1    | 0.04 | -1.91 |
| 181 | 3 | 0 | 0.8  | 3.39 | 1    | 0.19 | 3.73 | 0    | -3.73 | 1    | 0.01 | -2.87 |
| 182 | 2 | 0 | 0.8  | 3.01 | 1    | 0.21 | 2.49 | 0    | -2.49 | 1    | 0.04 | -1.91 |
| 183 | 1 | 0 | 1.51 | 3    | 1    | 0.33 | 0.66 | 0    | -0.66 | 1    | 0.33 | -0.51 |
| 184 | 2 | 0 | 0.8  | 3.39 | 1    | 0.19 | 2.49 | 0    | -2.49 | 1    | 0.04 | -1.91 |
| 185 | 2 | 0 | 0.8  | 3.01 | 1    | 0.21 | 2.49 | 0    | -2.49 | 1    | 0.04 | -1.91 |
| 186 | 1 | 0 | 0.78 | 3.41 | 1    | 0.19 | 1.28 | 0    | -1.28 | 1    | 0.19 | -0.98 |
| 187 | 2 | 0 | 0.8  | 3.71 | 1    | 0.18 | 2.49 | 0    | -2.49 | 1    | 0.03 | -1.91 |
| 188 | 2 | 0 | 1.13 | 3.39 | 1    | 0.25 | 1.78 | 0    | -1.78 | 1    | 0.06 | -1.37 |
| 189 | 2 | 0 | 0.8  | 3.71 | 1    | 0.18 | 2.49 | 0    | -2.49 | 1    | 0.03 | -1.91 |
| 190 | 4 | 0 | 1.51 | 2.99 | 1    | 0.33 | 2.66 | 0    | -2.66 | 1    | 0.01 | -2.04 |
| 191 | 0 | 0 | 0    | 2.96 | 0    | 0    | 0    | 0    | 0     | 0    | 0    | 0     |
| 192 | 3 | 0 | 2.2  | 2.29 | 1    | 0.49 | 1.36 | 0    | -1.36 | 1    | 0.12 | -1.05 |
| 193 | 2 | 0 | 1.13 | 3.39 | 1    | 0.25 | 1.78 | 0    | -1.78 | 1    | 0.06 | -1.37 |
| 194 | 2 | 1 | 1.24 | 3.28 | 0.67 | 0.27 | 1.61 | 0.31 | -1.31 | 0.98 | 0.18 | -1.01 |
| 195 | 2 | 0 | 1.51 | 2.84 | 1    | 0.35 | 1.33 | 0    | -1.33 | 1    | 0.12 | -1.02 |
| 196 | 3 | 0 | 1.51 | 2.9  | 1    | 0.34 | 1.99 | 0    | -1.99 | 1    | 0.04 | -1.53 |
| 197 | 3 | 0 | 2.24 | 2.25 | 1    | 0.5  | 1.34 | 0    | -1.34 | 1    | 0.12 | -1.03 |
| 198 | 0 | 0 | 0    | 4.52 | 0    | 0    | 0    | 0    | 0     | 0    | 0    | 0     |
| 199 | 3 | 0 | 2.2  | 2.32 | 1    | 0.49 | 1.37 | 0    | -1.37 | 1    | 0.12 | -1.05 |
| 200 | 3 | 0 | 1.59 | 2.93 | 1    | 0.35 | 1.89 | 0    | -1.89 | 1    | 0.04 | -1.46 |
| 201 | 1 | 0 | 0.8  | 3.71 | 1    | 0.18 | 1.24 | 0    | -1.24 | 1    | 0.18 | -0.96 |
| 202 | 2 | 4 | 1.11 | 2.89 | 0.33 | 0.28 | 1.81 | 1.38 | -0.42 | 0.79 | 0.53 | -0.33 |
| 203 | 2 | 0 | 0.8  | 3.71 | 1    | 0.18 | 2.49 | 0    | -2.49 | 1    | 0.03 | -1.91 |
| 204 | 1 | 1 | 1.34 | 3.18 | 0.5  | 0.3  | 0.75 | 0.31 | -0.43 | 0.91 | 0.5  | -0.33 |
| 205 | 2 | 1 | 0.8  | 3.18 | 0.67 | 0.2  | 2.49 | 0.31 | -2.17 | 0.99 | 0.11 | -1.67 |
| 206 | 1 | 1 | 0.83 | 3.68 | 0.5  | 0.18 | 1.2  | 0.27 | -0.93 | 0.97 | 0.34 | -0.71 |
| 207 | 2 | 0 | 0.8  | 3.01 | 1    | 0.21 | 2.49 | 0    | -2.49 | 1    | 0.04 | -1.91 |
| 208 | 3 | 0 | 1.59 | 2.93 | 1    | 0.35 | 1.89 | 0    | -1.89 | 1    | 0.04 | -1.45 |
| 209 | 2 | 1 | 1.47 | 3.03 | 0.67 | 0.33 | 1.36 | 0.33 | -1.03 | 0.97 | 0.25 | -0.79 |
| 210 | 1 | 0 | 0.81 | 3.34 | 1    | 0.2  | 1.23 | 0    | -1.23 | 1    | 0.2  | -0.95 |

|     |     |     |      |      |      |      |      |      |       |      |      |       |
|-----|-----|-----|------|------|------|------|------|------|-------|------|------|-------|
| 211 | 2   | 0   | 1.51 | 3.01 | 1    | 0.33 | 1.33 | 0    | -1.33 | 1    | 0.11 | -1.02 |
| 212 | 2   | 3   | 1.14 | 3.37 | 0.4  | 0.25 | 1.76 | 0.89 | -0.87 | 0.89 | 0.37 | -0.67 |
| 213 | 1   | 0   | 0.78 | 3.41 | 1    | 0.19 | 1.28 | 0    | -1.28 | 1    | 0.19 | -0.99 |
| 214 | 3   | 0   | 1.51 | 3.01 | 1    | 0.33 | 1.99 | 0    | -1.99 | 1    | 0.04 | -1.53 |
| 215 | 1   | 0   | 0.8  | 3.01 | 1    | 0.21 | 1.24 | 0    | -1.24 | 1    | 0.21 | -0.96 |
| 216 | 2   | 0   | 0.8  | 3.71 | 1    | 0.18 | 2.49 | 0    | -2.49 | 1    | 0.03 | -1.91 |
| 217 | 0.5 | 1.5 | 1.45 | 3.07 | 0.25 | 0.32 | 0.34 | 0.49 | 0.14  | 0.68 | 0.54 | 0.11  |
| 218 | 2   | 0   | 1.51 | 3.01 | 1    | 0.33 | 1.33 | 0    | -1.33 | 1    | 0.11 | -1.02 |
| 219 | 0   | 0   | 0    | 4.52 | 0    | 0    | 0    | 0    | 0     | 0    | 0    | 0     |
| 220 | 2   | 0   | 0.8  | 3.71 | 1    | 0.18 | 2.49 | 0    | -2.49 | 1    | 0.03 | -1.91 |
| 221 | 2   | 0   | 0.8  | 3.01 | 1    | 0.21 | 2.49 | 0    | -2.49 | 1    | 0.04 | -1.91 |
| 222 | 3   | 0   | 1.51 | 3.01 | 1    | 0.33 | 1.99 | 0    | -1.99 | 1    | 0.04 | -1.53 |
| 223 | 4   | 0   | 1.51 | 3.01 | 1    | 0.33 | 2.66 | 0    | -2.66 | 1    | 0.01 | -2.04 |
| 224 | 3   | 1   | 2.19 | 2.31 | 0.75 | 0.49 | 1.37 | 0.43 | -0.94 | 0.94 | 0.29 | -0.72 |
| 225 | 0.5 | 3.5 | 1.02 | 3.48 | 0.12 | 0.23 | 0.49 | 1.01 | 0.52  | 0.57 | 0.64 | 0.4   |
| 226 | 1   | 3   | 1.65 | 2.72 | 0.25 | 0.38 | 0.61 | 1.1  | 0.5   | 0.51 | 0.85 | 0.38  |
| 227 | 3   | 4   | 1.51 | 3.01 | 0.43 | 0.33 | 1.99 | 1.33 | -0.66 | 0.83 | 0.43 | -0.5  |
| 228 | 2   | 1   | 1.24 | 3.27 | 0.67 | 0.28 | 1.61 | 0.31 | -1.3  | 0.98 | 0.19 | -1    |
| 229 | 0   | 0   | 0    | 2.96 | 0    | 0    | 0    | 0    | 0     | 0    | 0    | 0     |
| 230 | 2   | 0   | 0.8  | 3.71 | 1    | 0.18 | 2.49 | 0    | -2.49 | 1    | 0.03 | -1.91 |
| 231 | 2   | 0   | 0.8  | 3.71 | 1    | 0.18 | 2.49 | 0    | -2.49 | 1    | 0.03 | -1.91 |
| 232 | 2   | 0   | 1.51 | 2.99 | 1    | 0.33 | 1.33 | 0    | -1.33 | 1    | 0.11 | -1.02 |
| 233 | 3   | 1   | 1.51 | 3.01 | 0.75 | 0.33 | 1.99 | 0.33 | -1.66 | 0.99 | 0.11 | -1.28 |
| 234 | 2   | 0   | 1.51 | 3.01 | 1    | 0.33 | 1.33 | 0    | -1.33 | 1    | 0.11 | -1.02 |
| 235 | 3   | 0   | 1.51 | 2.82 | 1    | 0.35 | 1.99 | 0    | -1.99 | 1    | 0.04 | -1.53 |
| 236 | 0   | 0   | 0    | 4.52 | 0    | 0    | 0    | 0    | 0     | 0    | 0    | 0     |
| 237 | 2.5 | 1.5 | 1.23 | 3.29 | 0.62 | 0.27 | 2.03 | 0.46 | -1.58 | 0.97 | 0.18 | -1.21 |
| 238 | 0   | 0   | 0.8  | 3.39 | 0    | 0.19 | 0    | 0    | 0     | 0    | 0    | 0     |
| 239 | 2   | 0   | 1.13 | 3.39 | 1    | 0.25 | 1.78 | 0    | -1.78 | 1    | 0.06 | -1.37 |
| 240 | 1   | 0   | 0.8  | 3.71 | 1    | 0.18 | 1.24 | 0    | -1.24 | 1    | 0.18 | -0.96 |
| 241 | 0   | 0   | 0    | 2.96 | 0    | 0    | 0    | 0    | 0     | 0    | 0    | 0     |
| 242 | 1   | 0   | 0.78 | 3.41 | 1    | 0.19 | 1.28 | 0    | -1.28 | 1    | 0.19 | -0.99 |
| 243 | 4   | 0   | 1.51 | 2.99 | 1    | 0.33 | 2.66 | 0    | -2.66 | 1    | 0.01 | -2.04 |
| 244 | 3   | 0   | 1.51 | 3.01 | 1    | 0.33 | 1.99 | 0    | -1.99 | 1    | 0.04 | -1.53 |
| 245 | 2   | 0   | 2.27 | 2.25 | 1    | 0.5  | 0.88 | 0    | -0.88 | 1    | 0.25 | -0.68 |
| 246 | 1   | 3   | 1.12 | 2.94 | 0.25 | 0.28 | 0.89 | 1.02 | 0.13  | 0.69 | 0.72 | 0.1   |

|     |     |     |      |      |      |      |      |      |       |      |      |       |
|-----|-----|-----|------|------|------|------|------|------|-------|------|------|-------|
| 247 | 3   | 0   | 1.84 | 2.68 | 1    | 0.41 | 1.63 | 0    | -1.63 | 1    | 0.07 | -1.26 |
| 248 | 0   | 0   | 0.78 | 2.93 | 0    | 0.21 | 0    | 0    | 0     | 0    | 0    | 0     |
| 249 | 1   | 0   | 0.79 | 2.92 | 1    | 0.21 | 1.27 | 0    | -1.27 | 1    | 0.21 | -0.97 |
| 250 | 3   | 2   | 1.49 | 3.02 | 0.6  | 0.33 | 2.01 | 0.66 | -1.35 | 0.96 | 0.21 | -1.04 |
| 251 | 2   | 0   | 0.8  | 3.01 | 1    | 0.21 | 2.49 | 0    | -2.49 | 1    | 0.04 | -1.91 |
| 252 | 2   | 0   | 1.54 | 2.98 | 1    | 0.34 | 1.3  | 0    | -1.3  | 1    | 0.12 | -1    |
| 253 | 1   | 0   | 1.13 | 3.39 | 1    | 0.25 | 0.89 | 0    | -0.89 | 1    | 0.25 | -0.68 |
| 254 | 0.5 | 3.5 | 0.5  | 4.02 | 0.12 | 0.11 | 1.01 | 0.87 | -0.13 | 0.78 | 0.37 | -0.1  |
| 255 | 1   | 0   | 1.1  | 3.42 | 1    | 0.24 | 0.91 | 0    | -0.91 | 1    | 0.24 | -0.7  |
| 256 | 3   | 0   | 0.8  | 3.71 | 1    | 0.18 | 3.73 | 0    | -3.73 | 1    | 0.01 | -2.87 |
| 257 | 3   | 0   | 1.51 | 3.01 | 1    | 0.33 | 1.99 | 0    | -1.99 | 1    | 0.04 | -1.53 |
| 258 | 2   | 1   | 1.51 | 3    | 0.67 | 0.34 | 1.32 | 0.33 | -0.99 | 0.96 | 0.26 | -0.76 |
| 259 | 0   | 0   | 0    | 4.52 | 0    | 0    | 0    | 0    | 0     | 0    | 0    | 0     |
| 260 | 2   | 0   | 1.51 | 3.01 | 1    | 0.33 | 1.33 | 0    | -1.33 | 1    | 0.11 | -1.02 |
| 261 | 5   | 0   | 2.03 | 2.47 | 1    | 0.45 | 2.46 | 0    | -2.46 | 1    | 0.02 | -1.89 |
| 262 | 2   | 1   | 1.49 | 3.03 | 0.67 | 0.33 | 1.35 | 0.33 | -1.02 | 0.96 | 0.25 | -0.78 |
| 263 | 1   | 0   | 0.8  | 3.71 | 1    | 0.18 | 1.24 | 0    | -1.24 | 1    | 0.18 | -0.96 |
| 264 | 2   | 0   | 1.13 | 3.39 | 1    | 0.25 | 1.78 | 0    | -1.78 | 1    | 0.06 | -1.37 |
| 265 | 2   | 0   | 0.78 | 3.41 | 1    | 0.19 | 2.55 | 0    | -2.55 | 1    | 0.03 | -1.96 |
| 266 | 2   | 0   | 0.8  | 3.01 | 1    | 0.21 | 2.49 | 0    | -2.49 | 1    | 0.04 | -1.91 |
| 267 | 1   | 0   | 2.18 | 2.34 | 1    | 0.48 | 0.46 | 0    | -0.46 | 1    | 0.48 | -0.35 |
| 268 | 4   | 0   | 1.51 | 3.01 | 1    | 0.33 | 2.66 | 0    | -2.66 | 1    | 0.01 | -2.04 |
| 269 | 1   | 0   | 0.78 | 3.37 | 1    | 0.19 | 1.28 | 0    | -1.28 | 1    | 0.19 | -0.98 |
| 270 | 0   | 0   | 0    | 2.96 | 0    | 0    | 0    | 0    | 0     | 0    | 0    | 0     |
| 271 | 3   | 0   | 1.51 | 2.82 | 1    | 0.35 | 1.99 | 0    | -1.99 | 1    | 0.04 | -1.53 |
| 272 | 3   | 0   | 1.51 | 3.01 | 1    | 0.33 | 1.99 | 0    | -1.99 | 1    | 0.04 | -1.53 |
| 273 | 0   | 0   | 0    | 2.96 | 0    | 0    | 0    | 0    | 0     | 0    | 0    | 0     |
| 274 | 0   | 0   | 1.51 | 3.01 | 0    | 0.33 | 0    | 0    | 0     | 0    | 0    | 0     |
| 275 | 3   | 0   | 1.1  | 3.42 | 1    | 0.24 | 2.72 | 0    | -2.72 | 1    | 0.01 | -2.09 |
| 276 | 2   | 0   | 2.21 | 2.28 | 1    | 0.49 | 0.91 | 0    | -0.91 | 1    | 0.24 | -0.7  |
| 277 | 3   | 0   | 1.51 | 2.79 | 1    | 0.35 | 1.99 | 0    | -1.99 | 1    | 0.04 | -1.53 |
| 278 | 0   | 1   | 1.51 | 3.01 | 0    | 0.33 | 0    | 0.33 | 0.33  | 0.67 | 0.33 | 0.26  |
| 279 | 1   | 0   | 1.13 | 3.39 | 1    | 0.25 | 0.89 | 0    | -0.89 | 1    | 0.25 | -0.68 |
| 280 | 3   | 0   | 1.51 | 3.01 | 1    | 0.33 | 1.99 | 0    | -1.99 | 1    | 0.04 | -1.53 |
| 281 | 2   | 2   | 1.45 | 3.07 | 0.5  | 0.32 | 1.38 | 0.65 | -0.72 | 0.9  | 0.39 | -0.56 |
| 282 | 2   | 0   | 0.8  | 3.01 | 1    | 0.21 | 2.49 | 0    | -2.49 | 1    | 0.04 | -1.91 |







|     |   |   |      |      |      |      |      |      |       |      |      |       |
|-----|---|---|------|------|------|------|------|------|-------|------|------|-------|
| 391 | 0 | 0 | 0    | 0    | 0    | 0    | 0    | 0    | 0     | 0    | 0    | 0     |
| 392 | 1 | 2 | 0.65 | 2.64 | 0.33 | 0.2  | 1.53 | 0.76 | -0.77 | 0.9  | 0.49 | -0.59 |
| 393 | 0 | 0 | 0.7  | 3.01 | 0    | 0.19 | 0    | 0    | 0     | 0    | 0    | 0     |
| 394 | 2 | 2 | 0.83 | 3.34 | 0.5  | 0.2  | 2.4  | 0.6  | -1.8  | 0.97 | 0.18 | -1.38 |
| 395 | 0 | 1 | 0.82 | 3.42 | 0    | 0.19 | 0    | 0.29 | 0.29  | 0.81 | 0.19 | 0.22  |
| 396 | 2 | 0 | 1.32 | 2.88 | 1    | 0.31 | 1.51 | 0    | -1.51 | 1    | 0.1  | -1.17 |
| 397 | 4 | 0 | 1.51 | 2.97 | 1    | 0.34 | 2.66 | 0    | -2.66 | 1    | 0.01 | -2.04 |
| 398 | 1 | 0 | 1.51 | 3.01 | 1    | 0.33 | 0.66 | 0    | -0.66 | 1    | 0.33 | -0.51 |
| 399 | 0 | 0 | 0.78 | 3.42 | 0    | 0.19 | 0    | 0    | 0     | 0    | 0    | 0     |
| 400 | 5 | 1 | 1.55 | 2.96 | 0.83 | 0.34 | 3.22 | 0.34 | -2.88 | 1    | 0.02 | -2.22 |
| 401 | 4 | 0 | 1.51 | 2.99 | 1    | 0.33 | 2.66 | 0    | -2.66 | 1    | 0.01 | -2.04 |
| 402 | 3 | 0 | 1.61 | 2.91 | 1    | 0.36 | 1.86 | 0    | -1.86 | 1    | 0.05 | -1.43 |
| 403 | 1 | 0 | 1.51 | 2.67 | 1    | 0.36 | 0.66 | 0    | -0.66 | 1    | 0.36 | -0.51 |
| 404 | 1 | 0 | 0.8  | 3.71 | 1    | 0.18 | 1.24 | 0    | -1.24 | 1    | 0.18 | -0.96 |
| 405 | 0 | 0 | 0.8  | 3.71 | 0    | 0.18 | 0    | 0    | 0     | 0    | 0    | 0     |
| 406 | 1 | 0 | 1.1  | 3.42 | 1    | 0.24 | 0.91 | 0    | -0.91 | 1    | 0.24 | -0.7  |
| 407 | 0 | 0 | 0.8  | 3.71 | 0    | 0.18 | 0    | 0    | 0     | 0    | 0    | 0     |
| 408 | 0 | 0 | 0.8  | 3.01 | 0    | 0.21 | 0    | 0    | 0     | 0    | 0    | 0     |
| 409 | 2 | 0 | 0.8  | 3.71 | 1    | 0.18 | 2.49 | 0    | -2.49 | 1    | 0.03 | -1.91 |
| 410 | 4 | 0 | 1.51 | 3.01 | 1    | 0.33 | 2.66 | 0    | -2.66 | 1    | 0.01 | -2.04 |
| 411 | 2 | 0 | 2.27 | 2.25 | 1    | 0.5  | 0.88 | 0    | -0.88 | 1    | 0.25 | -0.68 |
| 412 | 1 | 0 | 1.51 | 3.01 | 1    | 0.33 | 0.66 | 0    | -0.66 | 1    | 0.33 | -0.51 |
| 413 | 3 | 0 | 1.51 | 2.98 | 1    | 0.34 | 1.99 | 0    | -1.99 | 1    | 0.04 | -1.53 |
| 414 | 1 | 0 | 0.81 | 3.39 | 1    | 0.19 | 1.24 | 0    | -1.24 | 1    | 0.19 | -0.96 |
| 415 | 3 | 0 | 1.51 | 3.01 | 1    | 0.33 | 1.99 | 0    | -1.99 | 1    | 0.04 | -1.53 |
| 416 | 4 | 0 | 1.51 | 3.01 | 1    | 0.33 | 2.66 | 0    | -2.66 | 1    | 0.01 | -2.04 |
| 417 | 2 | 0 | 1.51 | 3.01 | 1    | 0.33 | 1.33 | 0    | -1.33 | 1    | 0.11 | -1.02 |
| 418 | 2 | 0 | 1.51 | 3.01 | 1    | 0.33 | 1.33 | 0    | -1.33 | 1    | 0.11 | -1.02 |
| 419 | 3 | 1 | 1.51 | 2.99 | 0.75 | 0.33 | 1.99 | 0.33 | -1.66 | 0.99 | 0.11 | -1.28 |
| 420 | 2 | 1 | 0.58 | 2.66 | 0.67 | 0.18 | 3.47 | 0.38 | -3.09 | 0.99 | 0.08 | -2.38 |
| 421 | 1 | 0 | 1.51 | 2.71 | 1    | 0.36 | 0.66 | 0    | -0.66 | 1    | 0.36 | -0.51 |
| 422 | 1 | 0 | 0.8  | 3.71 | 1    | 0.18 | 1.24 | 0    | -1.24 | 1    | 0.18 | -0.96 |
| 423 | 0 | 0 | 0    | 2.96 | 0    | 0    | 0    | 0    | 0     | 0    | 0    | 0     |
| 424 | 2 | 1 | 0.8  | 3.71 | 0.67 | 0.18 | 2.49 | 0.27 | -2.22 | 0.99 | 0.08 | -1.71 |
| 425 | 4 | 0 | 1.51 | 3.01 | 1    | 0.33 | 2.66 | 0    | -2.66 | 1    | 0.01 | -2.04 |
| 426 | 3 | 0 | 1.51 | 3.01 | 1    | 0.33 | 1.99 | 0    | -1.99 | 1    | 0.04 | -1.53 |

|     |     |     |      |      |      |      |      |      |       |      |      |       |
|-----|-----|-----|------|------|------|------|------|------|-------|------|------|-------|
| 427 | 1   | 0   | 2.13 | 2.31 | 1    | 0.48 | 0.47 | 0    | -0.47 | 1    | 0.48 | -0.36 |
| 428 | 1   | 0   | 1.51 | 3.01 | 1    | 0.33 | 0.66 | 0    | -0.66 | 1    | 0.33 | -0.51 |
| 429 | 2   | 0   | 0.8  | 3.39 | 1    | 0.19 | 2.49 | 0    | -2.49 | 1    | 0.04 | -1.91 |
| 430 | 1   | 0   | 0.8  | 3.71 | 1    | 0.18 | 1.24 | 0    | -1.24 | 1    | 0.18 | -0.96 |
| 431 | 2.5 | 1.5 | 1.46 | 3.06 | 0.62 | 0.32 | 1.71 | 0.49 | -1.22 | 0.94 | 0.25 | -0.94 |
| 432 | 0   | 0   | 1.51 | 3.01 | 0    | 0.33 | 0    | 0    | 0     | 0    | 0    | 0     |
| 433 | 2   | 0   | 1.13 | 3.39 | 1    | 0.25 | 1.78 | 0    | -1.78 | 1    | 0.06 | -1.37 |
| 434 | 2   | 1   | 1.55 | 2.95 | 0.67 | 0.34 | 1.29 | 0.34 | -0.95 | 0.96 | 0.27 | -0.73 |
| 435 | 2   | 0   | 1.01 | 3.5  | 1    | 0.22 | 1.97 | 0    | -1.97 | 1    | 0.05 | -1.52 |
| 436 | 3   | 0   | 1.51 | 3.01 | 1    | 0.33 | 1.99 | 0    | -1.99 | 1    | 0.04 | -1.53 |
| 437 | 4   | 0   | 1.96 | 2.41 | 1    | 0.45 | 2.04 | 0    | -2.04 | 1    | 0.04 | -1.57 |
| 438 | 0   | 0   | 0.8  | 3.39 | 0    | 0.19 | 0    | 0    | 0     | 0    | 0    | 0     |
| 439 | 3   | 0   | 2.21 | 2.28 | 1    | 0.49 | 1.36 | 0    | -1.36 | 1    | 0.12 | -1.04 |
| 440 | 2   | 0   | 1.51 | 3.01 | 1    | 0.33 | 1.33 | 0    | -1.33 | 1    | 0.11 | -1.02 |
| 441 | 3   | 0   | 1.59 | 2.93 | 1    | 0.35 | 1.89 | 0    | -1.89 | 1    | 0.04 | -1.46 |
| 442 | 3   | 0   | 2.09 | 2.33 | 1    | 0.47 | 1.44 | 0    | -1.44 | 1    | 0.11 | -1.11 |
| 443 | 2   | 0   | 1.89 | 2.44 | 1    | 0.44 | 1.06 | 0    | -1.06 | 1    | 0.19 | -0.81 |
| 444 | 4   | 0   | 1.98 | 2.53 | 1    | 0.44 | 2.02 | 0    | -2.02 | 1    | 0.04 | -1.56 |
| 445 | 3   | 0   | 1.51 | 3.01 | 1    | 0.33 | 1.99 | 0    | -1.99 | 1    | 0.04 | -1.53 |
| 446 | 3   | 1   | 1.42 | 3.1  | 0.75 | 0.31 | 2.12 | 0.32 | -1.8  | 0.99 | 0.09 | -1.38 |
| 447 | 1   | 0   | 0.8  | 3.71 | 1    | 0.18 | 1.24 | 0    | -1.24 | 1    | 0.18 | -0.96 |
| 448 | 0   | 0   | 0.78 | 3.42 | 0    | 0.19 | 0    | 0    | 0     | 0    | 0    | 0     |
| 449 | 1   | 0   | 0.79 | 3.41 | 1    | 0.19 | 1.27 | 0    | -1.27 | 1    | 0.19 | -0.97 |
| 450 | 3   | 0   | 1.51 | 3.01 | 1    | 0.33 | 1.99 | 0    | -1.99 | 1    | 0.04 | -1.53 |
| 451 | 4   | 0   | 2.19 | 2.31 | 1    | 0.49 | 1.83 | 0    | -1.83 | 1    | 0.06 | -1.41 |
| 452 | 3   | 0   | 1.51 | 3.01 | 1    | 0.33 | 1.99 | 0    | -1.99 | 1    | 0.04 | -1.53 |
| 453 | 2   | 0   | 1.51 | 3.01 | 1    | 0.33 | 1.33 | 0    | -1.33 | 1    | 0.11 | -1.02 |
| 454 | 3   | 0   | 1.97 | 2.55 | 1    | 0.44 | 1.52 | 0    | -1.52 | 1    | 0.08 | -1.17 |
| 455 | 2   | 0   | 1.51 | 3.01 | 1    | 0.33 | 1.33 | 0    | -1.33 | 1    | 0.11 | -1.02 |
| 456 | 1   | 0   | 1.13 | 3.39 | 1    | 0.25 | 0.89 | 0    | -0.89 | 1    | 0.25 | -0.68 |
| 457 | 1   | 0   | 1.51 | 3.01 | 1    | 0.33 | 0.66 | 0    | -0.66 | 1    | 0.33 | -0.51 |
| 458 | 0   | 0   | 1.13 | 3.39 | 0    | 0.25 | 0    | 0    | 0     | 0    | 0    | 0     |
| 459 | 1   | 0   | 1.51 | 3.01 | 1    | 0.33 | 0.66 | 0    | -0.66 | 1    | 0.33 | -0.51 |
| 460 | 3   | 0   | 0.8  | 3.71 | 1    | 0.18 | 3.73 | 0    | -3.73 | 1    | 0.01 | -2.87 |
| 461 | 3   | 0   | 1.51 | 3.01 | 1    | 0.33 | 1.99 | 0    | -1.99 | 1    | 0.04 | -1.53 |
| 462 | 2   | 0   | 1.83 | 2.61 | 1    | 0.41 | 1.1  | 0    | -1.1  | 1    | 0.17 | -0.84 |



|     |     |     |      |      |      |      |      |      |       |      |      |       |
|-----|-----|-----|------|------|------|------|------|------|-------|------|------|-------|
| 463 | 0   | 1   | 1.15 | 3.37 | 0    | 0.25 | 0    | 0.3  | 0.3   | 0.75 | 0.25 | 0.23  |
| 464 | 2   | 0   | 0.8  | 3.71 | 1    | 0.18 | 2.49 | 0    | -2.49 | 1    | 0.03 | -1.91 |
| 465 | 0   | 0   | 0.8  | 3.01 | 0    | 0.21 | 0    | 0    | 0     | 0    | 0    | 0     |
| 466 | 1   | 0   | 0.8  | 3.71 | 1    | 0.18 | 1.24 | 0    | -1.24 | 1    | 0.18 | -0.96 |
| 467 | 3   | 0   | 1.51 | 2.98 | 1    | 0.34 | 1.99 | 0    | -1.99 | 1    | 0.04 | -1.53 |
| 468 | 2   | 0   | 1.51 | 3.01 | 1    | 0.33 | 1.33 | 0    | -1.33 | 1    | 0.11 | -1.02 |
| 469 | 2   | 0   | 0.8  | 3.71 | 1    | 0.18 | 2.49 | 0    | -2.49 | 1    | 0.03 | -1.91 |
| 470 | 2   | 2   | 0.81 | 3.7  | 0.5  | 0.18 | 2.47 | 0.54 | -1.93 | 0.98 | 0.15 | -1.49 |
| 471 | 2.5 | 1.5 | 2.14 | 2.38 | 0.62 | 0.47 | 1.17 | 0.63 | -0.54 | 0.84 | 0.46 | -0.42 |
| 472 | 2   | 0   | 1.51 | 3.01 | 1    | 0.33 | 1.33 | 0    | -1.33 | 1    | 0.11 | -1.02 |
| 473 | 5   | 2   | 1.69 | 2.41 | 0.71 | 0.41 | 2.96 | 0.83 | -2.13 | 0.98 | 0.11 | -1.64 |
| 474 | 2   | 0   | 1.51 | 3.01 | 1    | 0.33 | 1.33 | 0    | -1.33 | 1    | 0.11 | -1.02 |
| 475 | 2   | 0   | 0.8  | 3.71 | 1    | 0.18 | 2.49 | 0    | -2.49 | 1    | 0.03 | -1.91 |
| 476 | 0   | 0   | 0    | 4.52 | 0    | 0    | 0    | 0    | 0     | 0    | 0    | 0     |
| 477 | 0   | 0   | 0.8  | 3.71 | 0    | 0.18 | 0    | 0    | 0     | 0    | 0    | 0     |
| 478 | 3   | 2   | 1.34 | 3.18 | 0.6  | 0.3  | 2.24 | 0.63 | -1.61 | 0.97 | 0.16 | -1.24 |
| 479 | 2   | 0   | 2.26 | 2.25 | 1    | 0.5  | 0.88 | 0    | -0.88 | 1    | 0.25 | -0.68 |
| 480 | 2   | 0   | 1.51 | 3.01 | 1    | 0.33 | 1.33 | 0    | -1.33 | 1    | 0.11 | -1.02 |
| 481 | 3   | 2   | 1.51 | 3.01 | 0.6  | 0.33 | 1.99 | 0.66 | -1.33 | 0.95 | 0.21 | -1.02 |
| 482 | 3   | 0   | 0.8  | 3.71 | 1    | 0.18 | 3.73 | 0    | -3.73 | 1    | 0.01 | -2.87 |
| 483 | 1   | 0   | 0.78 | 2.93 | 1    | 0.21 | 1.28 | 0    | -1.28 | 1    | 0.21 | -0.98 |
| 484 | 3   | 3   | 1.42 | 3.06 | 0.5  | 0.32 | 2.12 | 0.98 | -1.14 | 0.92 | 0.29 | -0.87 |
| 485 | 2   | 0   | 0.8  | 3.01 | 1    | 0.21 | 2.49 | 0    | -2.49 | 1    | 0.04 | -1.91 |
| 486 | 1   | 0   | 1.01 | 3.05 | 1    | 0.25 | 0.99 | 0    | -0.99 | 1    | 0.25 | -0.76 |
| 487 | 0   | 0   | 0    | 0    | 0    | 0    | 0    | 0    | 0     | 0    | 0    | 0     |

PSN2

| Codon | Observed S Changes | Observed NS Changes | E[S Sites] | E[NS Sites] | Observed S. Prop. | P{S} | dS   | dN   | dN-dS | P{NS >= observed } | P{NS <= observed } | Normalized dN-dS |
|-------|--------------------|---------------------|------------|-------------|-------------------|------|------|------|-------|--------------------|--------------------|------------------|
| 1     | 0                  | 0                   | 0          | 0.77        | 0                 | 0    | 0    | 0    | 0     | 0                  | 0                  | 0                |
| 2     | 0                  | 1                   | 0.9        | 1.86        | 0                 | 0.33 | 0    | 0.54 | 0.54  | 0.67               | 0.33               | 0.41             |
| 3     | 2                  | 2                   | 1          | 2.24        | 0.5               | 0.31 | 2    | 0.89 | -1.11 | 0.91               | 0.36               | -0.85            |
| 4     | 1                  | 3                   | 0.7        | 3.82        | 0.25              | 0.15 | 1.43 | 0.79 | -0.65 | 0.88               | 0.49               | -0.5             |

|    |      |      |      |      |      |      |      |      |       |      |      |       |
|----|------|------|------|------|------|------|------|------|-------|------|------|-------|
| 5  | 2    | 3    | 0.46 | 3.95 | 0.4  | 0.1  | 4.39 | 0.76 | -3.63 | 0.99 | 0.09 | -2.79 |
| 6  | 0    | 5    | 1.46 | 3.05 | 0    | 0.32 | 0    | 1.64 | 1.64  | 0.14 | 0.86 | 1.26  |
| 7  | 0    | 0    | 0    | 0    | 0    | 0    | 0    | 0    | 0     | 0    | 0    | 0     |
| 8  | 2    | 0    | 1.51 | 2.61 | 1    | 0.37 | 1.33 | 0    | -1.33 | 1    | 0.13 | -1.02 |
| 9  | 1    | 0    | 0.8  | 3.71 | 1    | 0.18 | 1.24 | 0    | -1.24 | 1    | 0.18 | -0.96 |
| 10 | 1    | 0    | 0.8  | 3.71 | 1    | 0.18 | 1.24 | 0    | -1.24 | 1    | 0.18 | -0.96 |
| 11 | 1    | 1    | 0.8  | 3.37 | 0.5  | 0.19 | 1.24 | 0.3  | -0.95 | 0.96 | 0.35 | -0.73 |
| 12 | 1    | 2    | 0.8  | 3.39 | 0.33 | 0.19 | 1.25 | 0.59 | -0.66 | 0.91 | 0.47 | -0.51 |
| 13 | 2    | 1    | 0.81 | 3.43 | 0.67 | 0.19 | 2.47 | 0.29 | -2.17 | 0.99 | 0.1  | -1.67 |
| 14 | 1.33 | 4.67 | 1.47 | 3.03 | 0.22 | 0.33 | 0.91 | 1.54 | 0.63  | 0.47 | 0.82 | 0.49  |
| 15 | 2    | 1    | 0.8  | 3.3  | 0.67 | 0.2  | 2.49 | 0.3  | -2.18 | 0.99 | 0.1  | -1.68 |
| 16 | 1    | 1    | 0.8  | 3.71 | 0.5  | 0.18 | 1.24 | 0.27 | -0.97 | 0.97 | 0.32 | -0.75 |
| 17 | 1    | 0    | 0.78 | 3.37 | 1    | 0.19 | 1.28 | 0    | -1.28 | 1    | 0.19 | -0.99 |
| 18 | 2    | 0    | 1.41 | 3.03 | 1    | 0.32 | 1.42 | 0    | -1.42 | 1    | 0.1  | -1.09 |
| 19 | 3    | 1    | 1.51 | 2.88 | 0.75 | 0.34 | 1.99 | 0.35 | -1.64 | 0.99 | 0.12 | -1.27 |
| 20 | 3    | 1    | 1.51 | 3.01 | 0.75 | 0.33 | 1.99 | 0.33 | -1.66 | 0.99 | 0.11 | -1.28 |
| 21 | 3    | 0    | 2.21 | 2.26 | 1    | 0.49 | 1.36 | 0    | -1.36 | 1    | 0.12 | -1.04 |
| 22 | 2    | 2    | 0.42 | 4.1  | 0.5  | 0.09 | 4.78 | 0.49 | -4.29 | 1    | 0.05 | -3.3  |
| 23 | 2    | 3    | 1.47 | 2.53 | 0.4  | 0.37 | 1.36 | 1.19 | -0.17 | 0.74 | 0.6  | -0.13 |
| 24 | 4    | 2    | 1.51 | 2.66 | 0.67 | 0.36 | 2.66 | 0.75 | -1.9  | 0.97 | 0.13 | -1.47 |
| 25 | 1    | 1    | 0.78 | 3.35 | 0.5  | 0.19 | 1.28 | 0.3  | -0.98 | 0.96 | 0.34 | -0.76 |
| 26 | 1    | 1    | 0.8  | 3.71 | 0.5  | 0.18 | 1.24 | 0.27 | -0.97 | 0.97 | 0.32 | -0.75 |
| 27 | 3    | 0    | 1.51 | 3.01 | 1    | 0.33 | 1.99 | 0    | -1.99 | 1    | 0.04 | -1.53 |
| 28 | 4    | 3    | 1.51 | 3.01 | 0.57 | 0.33 | 2.66 | 1    | -1.66 | 0.95 | 0.17 | -1.28 |
| 29 | 4    | 3    | 1.82 | 2.68 | 0.57 | 0.4  | 2.2  | 1.12 | -1.08 | 0.9  | 0.3  | -0.83 |
| 30 | 4    | 1    | 1.51 | 3.01 | 0.8  | 0.33 | 2.66 | 0.33 | -2.32 | 1    | 0.05 | -1.79 |
| 31 | 3    | 1    | 1.51 | 2.94 | 0.75 | 0.34 | 1.99 | 0.34 | -1.65 | 0.99 | 0.12 | -1.27 |
| 32 | 1    | 1    | 0.8  | 3.16 | 0.5  | 0.2  | 1.24 | 0.32 | -0.93 | 0.96 | 0.37 | -0.71 |
| 33 | 1    | 3    | 0.71 | 2.76 | 0.25 | 0.21 | 1.4  | 1.09 | -0.31 | 0.81 | 0.6  | -0.24 |
| 34 | 1    | 4    | 0.73 | 3.33 | 0.2  | 0.18 | 1.37 | 1.2  | -0.16 | 0.78 | 0.63 | -0.13 |
| 35 | 1    | 3    | 1.33 | 2.78 | 0.25 | 0.32 | 0.75 | 1.08 | 0.32  | 0.61 | 0.79 | 0.25  |
| 36 | 1.83 | 6.17 | 1.2  | 3.3  | 0.23 | 0.27 | 1.53 | 1.87 | 0.34  | 0.58 | 0.71 | 0.26  |
| 37 | 3    | 3    | 1.03 | 2.94 | 0.5  | 0.26 | 2.9  | 1.02 | -1.88 | 0.96 | 0.19 | -1.45 |
| 38 | 0.5  | 3.5  | 1.45 | 3.07 | 0.12 | 0.32 | 0.35 | 1.14 | 0.79  | 0.41 | 0.79 | 0.61  |
| 39 | 4    | 5    | 1.51 | 2.98 | 0.44 | 0.34 | 2.64 | 1.68 | -0.96 | 0.85 | 0.36 | -0.74 |
| 40 | 2    | 4    | 0.87 | 3.39 | 0.33 | 0.2  | 2.29 | 1.18 | -1.11 | 0.9  | 0.36 | -0.86 |

|    |      |      |      |      |      |      |      |      |       |      |      |       |
|----|------|------|------|------|------|------|------|------|-------|------|------|-------|
| 41 | 4.5  | 3.5  | 1.24 | 3.26 | 0.56 | 0.28 | 3.62 | 1.07 | -2.55 | 0.98 | 0.1  | -1.96 |
| 42 | 2.5  | 5.5  | 1.32 | 3.03 | 0.31 | 0.3  | 1.9  | 1.81 | -0.08 | 0.67 | 0.6  | -0.06 |
| 43 | 1    | 3    | 0.83 | 3.35 | 0.25 | 0.2  | 1.2  | 0.9  | -0.3  | 0.82 | 0.59 | -0.23 |
| 44 | 4    | 4    | 1.24 | 3.28 | 0.5  | 0.27 | 3.22 | 1.22 | -2    | 0.96 | 0.15 | -1.54 |
| 45 | 3.5  | 7.5  | 1.4  | 3.09 | 0.32 | 0.31 | 2.49 | 2.43 | -0.07 | 0.65 | 0.59 | -0.05 |
| 46 | 2    | 5    | 1.44 | 3.05 | 0.29 | 0.32 | 1.38 | 1.64 | 0.26  | 0.6  | 0.71 | 0.2   |
| 47 | 2    | 2    | 0.79 | 3.15 | 0.5  | 0.2  | 2.54 | 0.63 | -1.91 | 0.97 | 0.18 | -1.47 |
| 48 | 2    | 2    | 0.95 | 2.97 | 0.5  | 0.24 | 2.1  | 0.67 | -1.42 | 0.95 | 0.25 | -1.09 |
| 49 | 1    | 3    | 0.96 | 2.9  | 0.25 | 0.25 | 1.04 | 1.04 | 0     | 0.74 | 0.68 | 0     |
| 50 | 2    | 3    | 0.87 | 3.16 | 0.4  | 0.22 | 2.3  | 0.95 | -1.35 | 0.93 | 0.3  | -1.04 |
| 51 | 1.5  | 3.5  | 0.79 | 2.69 | 0.3  | 0.23 | 1.9  | 1.3  | -0.6  | 0.8  | 0.52 | -0.46 |
| 52 | 2    | 4    | 1.1  | 2.88 | 0.33 | 0.28 | 1.82 | 1.39 | -0.43 | 0.79 | 0.53 | -0.33 |
| 53 | 3    | 5    | 0.91 | 3.19 | 0.38 | 0.22 | 3.31 | 1.57 | -1.74 | 0.92 | 0.25 | -1.34 |
| 54 | 2.5  | 4.5  | 0.9  | 3.04 | 0.36 | 0.23 | 2.78 | 1.48 | -1.29 | 0.87 | 0.35 | -1    |
| 55 | 2    | 5    | 0.91 | 3.06 | 0.29 | 0.23 | 2.19 | 1.63 | -0.56 | 0.8  | 0.5  | -0.43 |
| 56 | 1    | 5    | 0.8  | 3.26 | 0.17 | 0.2  | 1.25 | 1.53 | 0.29  | 0.66 | 0.73 | 0.22  |
| 57 | 1    | 1    | 0.32 | 1.48 | 0.5  | 0.18 | 3.12 | 0.68 | -2.45 | 0.97 | 0.32 | -1.88 |
| 58 | 1.5  | 4.5  | 0.75 | 2.66 | 0.25 | 0.22 | 2.01 | 1.69 | -0.32 | 0.74 | 0.58 | -0.25 |
| 59 | 2    | 1    | 0.62 | 2.69 | 0.67 | 0.19 | 3.21 | 0.37 | -2.84 | 0.99 | 0.09 | -2.18 |
| 60 | 0    | 2    | 0.62 | 2.69 | 0    | 0.19 | 0    | 0.74 | 0.74  | 0.66 | 0.34 | 0.57  |
| 61 | 0.5  | 1.5  | 0.53 | 2.25 | 0.25 | 0.19 | 0.94 | 0.67 | -0.27 | 0.81 | 0.35 | -0.21 |
| 62 | 2.67 | 4.33 | 1.48 | 3.04 | 0.38 | 0.33 | 1.81 | 1.42 | -0.38 | 0.75 | 0.52 | -0.29 |
| 63 | 3    | 3    | 0.97 | 3.54 | 0.5  | 0.22 | 3.09 | 0.85 | -2.24 | 0.98 | 0.12 | -1.72 |
| 64 | 1.33 | 4.67 | 1.46 | 3.03 | 0.22 | 0.32 | 0.92 | 1.54 | 0.63  | 0.48 | 0.81 | 0.48  |
| 65 | 4    | 6    | 0.89 | 3.34 | 0.4  | 0.21 | 4.5  | 1.8  | -2.7  | 0.96 | 0.14 | -2.08 |
| 66 | 3    | 4    | 1.49 | 2.94 | 0.43 | 0.34 | 2.01 | 1.36 | -0.65 | 0.82 | 0.44 | -0.5  |
| 67 | 2.5  | 6.5  | 0.96 | 3.32 | 0.28 | 0.23 | 2.59 | 1.96 | -0.64 | 0.77 | 0.48 | -0.49 |
| 68 | 2.5  | 3.5  | 1.21 | 3.28 | 0.42 | 0.27 | 2.07 | 1.07 | -1    | 0.87 | 0.36 | -0.77 |
| 69 | 2.33 | 3.67 | 1.46 | 3.03 | 0.39 | 0.33 | 1.6  | 1.21 | -0.39 | 0.77 | 0.52 | -0.3  |
| 70 | 3    | 4    | 1.47 | 3.05 | 0.43 | 0.33 | 2.04 | 1.31 | -0.73 | 0.84 | 0.41 | -0.56 |
| 71 | 3    | 3    | 1.51 | 3.01 | 0.5  | 0.33 | 1.98 | 1    | -0.98 | 0.9  | 0.32 | -0.76 |
| 72 | 0    | 0    | 0    | 0    | 0    | 0    | 0    | 0    | 0     | 0    | 0    | 0     |
| 73 | 0    | 0    | 0    | 0    | 0    | 0    | 0    | 0    | 0     | 0    | 0    | 0     |
| 74 | 0    | 0    | 0    | 0    | 0    | 0    | 0    | 0    | 0     | 0    | 0    | 0     |
| 75 | 3    | 3    | 1.42 | 3.1  | 0.5  | 0.31 | 2.11 | 0.97 | -1.14 | 0.92 | 0.28 | -0.88 |
| 76 | 2    | 5    | 1.45 | 2.73 | 0.29 | 0.35 | 1.38 | 1.83 | 0.45  | 0.54 | 0.76 | 0.35  |

|     |     |     |      |      |      |      |      |      |       |      |      |       |   |
|-----|-----|-----|------|------|------|------|------|------|-------|------|------|-------|---|
| 77  | 0   | 0   | 0    | 0    | 0    | 0    | 0    | 0    | 0     | 0    | 0    | 0     | 0 |
| 78  | 0   | 0   | 0    | 0    | 0    | 0    | 0    | 0    | 0     | 0    | 0    | 0     | 0 |
| 79  | 0   | 0   | 0    | 0    | 0    | 0    | 0    | 0    | 0     | 0    | 0    | 0     | 0 |
| 80  | 0   | 0   | 0    | 0    | 0    | 0    | 0    | 0    | 0     | 0    | 0    | 0     | 0 |
| 81  | 0   | 0   | 0    | 0    | 0    | 0    | 0    | 0    | 0     | 0    | 0    | 0     | 0 |
| 82  | 4   | 5   | 1.44 | 3.06 | 0.44 | 0.32 | 2.78 | 1.63 | -1.15 | 0.88 | 0.32 | -0.88 |   |
| 83  | 0   | 0   | 0    | 0    | 0    | 0    | 0    | 0    | 0     | 0    | 0    | 0     | 0 |
| 84  | 0   | 0   | 0    | 0    | 0    | 0    | 0    | 0    | 0     | 0    | 0    | 0     | 0 |
| 85  | 0   | 0   | 0    | 0    | 0    | 0    | 0    | 0    | 0     | 0    | 0    | 0     | 0 |
| 86  | 0   | 0   | 0    | 0    | 0    | 0    | 0    | 0    | 0     | 0    | 0    | 0     | 0 |
| 87  | 0   | 0   | 0    | 0    | 0    | 0    | 0    | 0    | 0     | 0    | 0    | 0     | 0 |
| 88  | 0   | 0   | 0    | 0    | 0    | 0    | 0    | 0    | 0     | 0    | 0    | 0     | 0 |
| 89  | 2.5 | 7.5 | 1.1  | 3.33 | 0.25 | 0.25 | 2.26 | 2.25 | -0.01 | 0.65 | 0.61 | -0.01 |   |
| 90  | 2.5 | 4.5 | 1.34 | 3.15 | 0.36 | 0.3  | 1.86 | 1.43 | -0.43 | 0.76 | 0.51 | -0.33 |   |
| 91  | 0.5 | 3.5 | 1.72 | 2.78 | 0.12 | 0.38 | 0.29 | 1.26 | 0.97  | 0.32 | 0.86 | 0.75  |   |
| 92  | 0   | 0   | 0    | 0    | 0    | 0    | 0    | 0    | 0     | 0    | 0    | 0     | 0 |
| 93  | 0   | 0   | 0    | 0    | 0    | 0    | 0    | 0    | 0     | 0    | 0    | 0     | 0 |
| 94  | 0   | 0   | 0    | 0    | 0    | 0    | 0    | 0    | 0     | 0    | 0    | 0     | 0 |
| 95  | 2   | 1   | 0.78 | 3.39 | 0.67 | 0.19 | 2.55 | 0.3  | -2.25 | 0.99 | 0.09 | -1.73 |   |
| 96  | 3   | 0   | 0.81 | 3.34 | 1    | 0.19 | 3.7  | 0    | -3.7  | 1    | 0.01 | -2.85 |   |
| 97  | 1   | 0   | 0.78 | 3.37 | 1    | 0.19 | 1.28 | 0    | -1.28 | 1    | 0.19 | -0.99 |   |
| 98  | 3   | 0   | 2.19 | 2.31 | 1    | 0.49 | 1.37 | 0    | -1.37 | 1    | 0.12 | -1.05 |   |
| 99  | 3   | 0   | 1.51 | 3.01 | 1    | 0.33 | 1.99 | 0    | -1.99 | 1    | 0.04 | -1.53 |   |
| 100 | 3   | 0   | 1.55 | 2.97 | 1    | 0.34 | 1.94 | 0    | -1.94 | 1    | 0.04 | -1.49 |   |
| 101 | 2   | 0   | 0.82 | 3.38 | 1    | 0.19 | 2.45 | 0    | -2.45 | 1    | 0.04 | -1.89 |   |
| 102 | 2   | 0   | 0.8  | 3.01 | 1    | 0.21 | 2.49 | 0    | -2.49 | 1    | 0.04 | -1.91 |   |
| 103 | 4   | 0   | 1.51 | 2.82 | 1    | 0.35 | 2.66 | 0    | -2.66 | 1    | 0.01 | -2.04 |   |
| 104 | 3   | 0   | 1.51 | 3.01 | 1    | 0.33 | 1.99 | 0    | -1.99 | 1    | 0.04 | -1.53 |   |
| 105 | 1   | 1   | 0.82 | 3.37 | 0.5  | 0.2  | 1.21 | 0.3  | -0.92 | 0.96 | 0.35 | -0.7  |   |
| 106 | 3   | 0   | 0.8  | 3.71 | 1    | 0.18 | 3.73 | 0    | -3.73 | 1    | 0.01 | -2.87 |   |
| 107 | 2   | 0   | 1.51 | 3.01 | 1    | 0.33 | 1.33 | 0    | -1.33 | 1    | 0.11 | -1.02 |   |
| 108 | 1   | 0   | 1.13 | 3.39 | 1    | 0.25 | 0.89 | 0    | -0.89 | 1    | 0.25 | -0.68 |   |
| 109 | 0   | 0   | 0    | 4.52 | 0    | 0    | 0    | 0    | 0     | 0    | 0    | 0     | 0 |
| 110 | 3   | 0   | 1.8  | 2.71 | 1    | 0.4  | 1.67 | 0    | -1.67 | 1    | 0.06 | -1.28 |   |
| 111 | 2   | 0   | 0.8  | 3.71 | 1    | 0.18 | 2.49 | 0    | -2.49 | 1    | 0.03 | -1.91 |   |
| 112 | 3   | 1   | 1.42 | 3.1  | 0.75 | 0.31 | 2.12 | 0.32 | -1.8  | 0.99 | 0.09 | -1.38 |   |

|     |     |     |      |      |      |      |      |      |       |      |      |       |
|-----|-----|-----|------|------|------|------|------|------|-------|------|------|-------|
| 113 | 2   | 0   | 1.51 | 3.01 | 1    | 0.33 | 1.33 | 0    | -1.33 | 1    | 0.11 | -1.02 |
| 114 | 1   | 0   | 1.51 | 3.01 | 1    | 0.33 | 0.66 | 0    | -0.66 | 1    | 0.33 | -0.51 |
| 115 | 4   | 0   | 1.51 | 3.01 | 1    | 0.33 | 2.66 | 0    | -2.66 | 1    | 0.01 | -2.04 |
| 116 | 2   | 0   | 2.12 | 2.4  | 1    | 0.47 | 0.94 | 0    | -0.94 | 1    | 0.22 | -0.73 |
| 117 | 2   | 0   | 0.8  | 3.39 | 1    | 0.19 | 2.49 | 0    | -2.49 | 1    | 0.04 | -1.91 |
| 118 | 0   | 0   | 0    | 4.52 | 0    | 0    | 0    | 0    | 0     | 0    | 0    | 0     |
| 119 | 2.5 | 1.5 | 1.35 | 3.17 | 0.62 | 0.3  | 1.86 | 0.47 | -1.38 | 0.95 | 0.21 | -1.06 |
| 120 | 2   | 0   | 1.51 | 3.01 | 1    | 0.33 | 1.33 | 0    | -1.33 | 1    | 0.11 | -1.02 |
| 121 | 3   | 0   | 1.51 | 3.01 | 1    | 0.33 | 1.99 | 0    | -1.99 | 1    | 0.04 | -1.53 |
| 122 | 3   | 0   | 1.51 | 3.01 | 1    | 0.33 | 1.99 | 0    | -1.99 | 1    | 0.04 | -1.53 |
| 123 | 1   | 1   | 1.51 | 3.01 | 0.5  | 0.33 | 0.66 | 0.33 | -0.33 | 0.89 | 0.56 | -0.26 |
| 124 | 3   | 0   | 1.51 | 3.01 | 1    | 0.33 | 1.99 | 0    | -1.99 | 1    | 0.04 | -1.53 |
| 125 | 1   | 0   | 1.01 | 3.5  | 1    | 0.22 | 0.99 | 0    | -0.99 | 1    | 0.22 | -0.76 |
| 126 | 1   | 0   | 0.79 | 3.41 | 1    | 0.19 | 1.27 | 0    | -1.27 | 1    | 0.19 | -0.97 |
| 127 | 5   | 0   | 1.51 | 2.95 | 1    | 0.34 | 3.32 | 0    | -3.32 | 1    | 0    | -2.55 |
| 128 | 2   | 0   | 1.51 | 3.01 | 1    | 0.33 | 1.33 | 0    | -1.33 | 1    | 0.11 | -1.02 |
| 129 | 3   | 2   | 1.12 | 3.4  | 0.6  | 0.25 | 2.68 | 0.59 | -2.09 | 0.98 | 0.1  | -1.61 |
| 130 | 0   | 0   | 0.8  | 3.71 | 0    | 0.18 | 0    | 0    | 0     | 0    | 0    | 0     |
| 131 | 2   | 0   | 0.8  | 3.01 | 1    | 0.21 | 2.49 | 0    | -2.49 | 1    | 0.04 | -1.91 |
| 132 | 3   | 1   | 1.51 | 2.98 | 0.75 | 0.34 | 1.99 | 0.34 | -1.66 | 0.99 | 0.11 | -1.27 |
| 133 | 0   | 0   | 0.78 | 3.38 | 0    | 0.19 | 0    | 0    | 0     | 0    | 0    | 0     |
| 134 | 1   | 0   | 0.78 | 3.41 | 1    | 0.19 | 1.28 | 0    | -1.28 | 1    | 0.19 | -0.98 |
| 135 | 2   | 2   | 0.8  | 3.71 | 0.5  | 0.18 | 2.49 | 0.54 | -1.95 | 0.98 | 0.15 | -1.5  |
| 136 | 2.5 | 1.5 | 1.47 | 2.74 | 0.62 | 0.35 | 1.7  | 0.55 | -1.15 | 0.93 | 0.28 | -0.88 |
| 137 | 1   | 0   | 0.78 | 2.93 | 1    | 0.21 | 1.28 | 0    | -1.28 | 1    | 0.21 | -0.99 |
| 138 | 0   | 0   | 0    | 0    | 0    | 0    | 0    | 0    | 0     | 0    | 0    | 0     |
| 139 | 3   | 0   | 1.63 | 2.89 | 1    | 0.36 | 1.85 | 0    | -1.85 | 1    | 0.05 | -1.42 |
| 140 | 1   | 0   | 1.13 | 3.39 | 1    | 0.25 | 0.89 | 0    | -0.89 | 1    | 0.25 | -0.68 |
| 141 | 3   | 0   | 0.8  | 3.01 | 1    | 0.21 | 3.73 | 0    | -3.73 | 1    | 0.01 | -2.87 |
| 142 | 3   | 0   | 1.51 | 3.01 | 1    | 0.33 | 1.99 | 0    | -1.99 | 1    | 0.04 | -1.53 |
| 143 | 2   | 0   | 1.51 | 3.01 | 1    | 0.33 | 1.33 | 0    | -1.33 | 1    | 0.11 | -1.02 |
| 144 | 1   | 0   | 0.8  | 3.71 | 1    | 0.18 | 1.24 | 0    | -1.24 | 1    | 0.18 | -0.96 |
| 145 | 3.5 | 5.5 | 1.44 | 3.07 | 0.39 | 0.32 | 2.44 | 1.79 | -0.65 | 0.78 | 0.45 | -0.5  |
| 146 | 2   | 0   | 0.8  | 3.35 | 1    | 0.19 | 2.49 | 0    | -2.49 | 1    | 0.04 | -1.92 |
| 147 | 1   | 1   | 0.8  | 3.71 | 0.5  | 0.18 | 1.24 | 0.27 | -0.97 | 0.97 | 0.32 | -0.75 |
| 148 | 4   | 1   | 1.51 | 3.01 | 0.8  | 0.33 | 2.66 | 0.33 | -2.32 | 1    | 0.05 | -1.79 |

|     |     |     |      |      |      |      |      |      |       |      |      |       |
|-----|-----|-----|------|------|------|------|------|------|-------|------|------|-------|
| 149 | 3   | 5   | 1.47 | 3.03 | 0.38 | 0.33 | 2.04 | 1.65 | -0.39 | 0.75 | 0.52 | -0.3  |
| 150 | 5   | 1   | 1.48 | 2.71 | 0.83 | 0.35 | 3.37 | 0.37 | -3    | 1    | 0.02 | -2.31 |
| 151 | 2   | 0   | 1.51 | 3.01 | 1    | 0.33 | 1.33 | 0    | -1.33 | 1    | 0.11 | -1.02 |
| 152 | 0   | 0   | 1.51 | 3.01 | 0    | 0.33 | 0    | 0    | 0     | 0    | 0    | 0     |
| 153 | 0.5 | 2.5 | 0.82 | 2.97 | 0.17 | 0.22 | 0.61 | 0.84 | 0.23  | 0.68 | 0.52 | 0.18  |
| 154 | 5   | 0   | 1.74 | 2.75 | 1    | 0.39 | 2.87 | 0    | -2.87 | 1    | 0.01 | -2.21 |
| 155 | 1   | 0   | 1.55 | 2.97 | 1    | 0.34 | 0.65 | 0    | -0.65 | 1    | 0.34 | -0.5  |
| 156 | 4   | 0   | 1.79 | 2.63 | 1    | 0.41 | 2.23 | 0    | -2.23 | 1    | 0.03 | -1.72 |
| 157 | 1   | 1   | 0.8  | 3.71 | 0.5  | 0.18 | 1.24 | 0.27 | -0.97 | 0.97 | 0.32 | -0.75 |
| 158 | 2   | 0   | 1.51 | 3.01 | 1    | 0.33 | 1.33 | 0    | -1.33 | 1    | 0.11 | -1.02 |
| 159 | 1   | 0   | 1.51 | 3.01 | 1    | 0.33 | 0.66 | 0    | -0.66 | 1    | 0.33 | -0.51 |
| 160 | 5   | 0   | 1.83 | 2.69 | 1    | 0.41 | 2.73 | 0    | -2.73 | 1    | 0.01 | -2.1  |
| 161 | 1   | 0   | 0.8  | 3.71 | 1    | 0.18 | 1.24 | 0    | -1.24 | 1    | 0.18 | -0.96 |
| 162 | 3   | 0   | 1.51 | 3.01 | 1    | 0.33 | 1.99 | 0    | -1.99 | 1    | 0.04 | -1.53 |
| 163 | 3   | 1   | 1.54 | 2.98 | 0.75 | 0.34 | 1.95 | 0.34 | -1.62 | 0.99 | 0.12 | -1.24 |
| 164 | 1   | 1   | 1.12 | 3.4  | 0.5  | 0.25 | 0.89 | 0.29 | -0.6  | 0.94 | 0.43 | -0.46 |
| 165 | 0   | 0   | 0    | 4.52 | 0    | 0    | 0    | 0    | 0     | 0    | 0    | 0     |
| 166 | 0   | 0   | 1.13 | 3.39 | 0    | 0.25 | 0    | 0    | 0     | 0    | 0    | 0     |
| 167 | 1   | 0   | 0.8  | 3.71 | 1    | 0.18 | 1.24 | 0    | -1.24 | 1    | 0.18 | -0.96 |
| 168 | 2   | 0   | 1.51 | 3.01 | 1    | 0.33 | 1.33 | 0    | -1.33 | 1    | 0.11 | -1.02 |
| 169 | 3   | 0   | 1.01 | 3.5  | 1    | 0.22 | 2.96 | 0    | -2.96 | 1    | 0.01 | -2.27 |
| 170 | 5   | 1   | 1.67 | 2.85 | 0.83 | 0.37 | 3    | 0.35 | -2.65 | 1    | 0.03 | -2.04 |
| 171 | 3   | 3   | 1.47 | 3.05 | 0.5  | 0.33 | 2.04 | 0.98 | -1.06 | 0.91 | 0.3  | -0.82 |
| 172 | 0   | 0   | 0    | 4.52 | 0    | 0    | 0    | 0    | 0     | 0    | 0    | 0     |
| 173 | 4   | 0   | 1.51 | 3.01 | 1    | 0.33 | 2.66 | 0    | -2.66 | 1    | 0.01 | -2.04 |
| 174 | 2   | 0   | 1.1  | 3.42 | 1    | 0.24 | 1.82 | 0    | -1.82 | 1    | 0.06 | -1.4  |
| 175 | 0   | 1   | 0.82 | 3.7  | 0    | 0.18 | 0    | 0.27 | 0.27  | 0.82 | 0.18 | 0.21  |
| 176 | 5   | 0   | 2.19 | 2.3  | 1    | 0.49 | 2.28 | 0    | -2.28 | 1    | 0.03 | -1.76 |
| 177 | 3   | 0   | 1.51 | 3.01 | 1    | 0.33 | 1.99 | 0    | -1.99 | 1    | 0.04 | -1.53 |
| 178 | 3   | 2   | 1.56 | 2.96 | 0.6  | 0.35 | 1.92 | 0.68 | -1.24 | 0.95 | 0.23 | -0.96 |
| 179 | 2   | 1   | 1.51 | 2.98 | 0.67 | 0.34 | 1.32 | 0.34 | -0.99 | 0.96 | 0.26 | -0.76 |
| 180 | 2   | 0   | 0.8  | 3.01 | 1    | 0.21 | 2.49 | 0    | -2.49 | 1    | 0.04 | -1.91 |
| 181 | 3   | 0   | 0.8  | 3.39 | 1    | 0.19 | 3.73 | 0    | -3.73 | 1    | 0.01 | -2.87 |
| 182 | 2   | 0   | 0.8  | 3.01 | 1    | 0.21 | 2.49 | 0    | -2.49 | 1    | 0.04 | -1.91 |
| 183 | 1   | 0   | 1.51 | 3    | 1    | 0.33 | 0.66 | 0    | -0.66 | 1    | 0.33 | -0.51 |
| 184 | 2   | 0   | 0.8  | 3.39 | 1    | 0.19 | 2.49 | 0    | -2.49 | 1    | 0.04 | -1.91 |

|     |     |     |      |      |      |      |      |      |       |      |      |       |
|-----|-----|-----|------|------|------|------|------|------|-------|------|------|-------|
| 185 | 2   | 0   | 0.8  | 3.01 | 1    | 0.21 | 2.49 | 0    | -2.49 | 1    | 0.04 | -1.91 |
| 186 | 1   | 0   | 0.78 | 3.41 | 1    | 0.19 | 1.28 | 0    | -1.28 | 1    | 0.19 | -0.98 |
| 187 | 2   | 0   | 0.8  | 3.71 | 1    | 0.18 | 2.49 | 0    | -2.49 | 1    | 0.03 | -1.91 |
| 188 | 2   | 0   | 1.13 | 3.39 | 1    | 0.25 | 1.78 | 0    | -1.78 | 1    | 0.06 | -1.37 |
| 189 | 2   | 0   | 0.8  | 3.71 | 1    | 0.18 | 2.49 | 0    | -2.49 | 1    | 0.03 | -1.91 |
| 190 | 4   | 0   | 1.51 | 2.99 | 1    | 0.33 | 2.66 | 0    | -2.66 | 1    | 0.01 | -2.04 |
| 191 | 0   | 0   | 0    | 2.96 | 0    | 0    | 0    | 0    | 0     | 0    | 0    | 0     |
| 192 | 3   | 0   | 2.2  | 2.29 | 1    | 0.49 | 1.36 | 0    | -1.36 | 1    | 0.12 | -1.05 |
| 193 | 2   | 0   | 1.13 | 3.39 | 1    | 0.25 | 1.78 | 0    | -1.78 | 1    | 0.06 | -1.37 |
| 194 | 2   | 1   | 1.24 | 3.28 | 0.67 | 0.27 | 1.61 | 0.31 | -1.31 | 0.98 | 0.18 | -1.01 |
| 195 | 2   | 0   | 1.51 | 2.84 | 1    | 0.35 | 1.33 | 0    | -1.33 | 1    | 0.12 | -1.02 |
| 196 | 3   | 0   | 1.51 | 2.9  | 1    | 0.34 | 1.99 | 0    | -1.99 | 1    | 0.04 | -1.53 |
| 197 | 3   | 0   | 2.24 | 2.25 | 1    | 0.5  | 1.34 | 0    | -1.34 | 1    | 0.12 | -1.03 |
| 198 | 0   | 0   | 0    | 4.52 | 0    | 0    | 0    | 0    | 0     | 0    | 0    | 0     |
| 199 | 3   | 0   | 2.2  | 2.32 | 1    | 0.49 | 1.37 | 0    | -1.37 | 1    | 0.12 | -1.05 |
| 200 | 3   | 0   | 1.59 | 2.93 | 1    | 0.35 | 1.89 | 0    | -1.89 | 1    | 0.04 | -1.46 |
| 201 | 1   | 0   | 0.8  | 3.71 | 1    | 0.18 | 1.24 | 0    | -1.24 | 1    | 0.18 | -0.96 |
| 202 | 2   | 4   | 1.11 | 2.89 | 0.33 | 0.28 | 1.81 | 1.38 | -0.42 | 0.79 | 0.53 | -0.33 |
| 203 | 2   | 0   | 0.8  | 3.71 | 1    | 0.18 | 2.49 | 0    | -2.49 | 1    | 0.03 | -1.91 |
| 204 | 1   | 1   | 1.34 | 3.18 | 0.5  | 0.3  | 0.75 | 0.31 | -0.43 | 0.91 | 0.5  | -0.33 |
| 205 | 2   | 1   | 0.8  | 3.18 | 0.67 | 0.2  | 2.49 | 0.31 | -2.17 | 0.99 | 0.11 | -1.67 |
| 206 | 1   | 1   | 0.83 | 3.68 | 0.5  | 0.18 | 1.2  | 0.27 | -0.93 | 0.97 | 0.34 | -0.71 |
| 207 | 2   | 0   | 0.8  | 3.01 | 1    | 0.21 | 2.49 | 0    | -2.49 | 1    | 0.04 | -1.91 |
| 208 | 3   | 0   | 1.59 | 2.93 | 1    | 0.35 | 1.89 | 0    | -1.89 | 1    | 0.04 | -1.45 |
| 209 | 2   | 1   | 1.47 | 3.03 | 0.67 | 0.33 | 1.36 | 0.33 | -1.03 | 0.97 | 0.25 | -0.79 |
| 210 | 1   | 0   | 0.81 | 3.34 | 1    | 0.2  | 1.23 | 0    | -1.23 | 1    | 0.2  | -0.95 |
| 211 | 2   | 0   | 1.51 | 3.01 | 1    | 0.33 | 1.33 | 0    | -1.33 | 1    | 0.11 | -1.02 |
| 212 | 2   | 3   | 1.14 | 3.37 | 0.4  | 0.25 | 1.76 | 0.89 | -0.87 | 0.89 | 0.37 | -0.67 |
| 213 | 1   | 0   | 0.78 | 3.41 | 1    | 0.19 | 1.28 | 0    | -1.28 | 1    | 0.19 | -0.99 |
| 214 | 3   | 0   | 1.51 | 3.01 | 1    | 0.33 | 1.99 | 0    | -1.99 | 1    | 0.04 | -1.53 |
| 215 | 1   | 0   | 0.8  | 3.01 | 1    | 0.21 | 1.24 | 0    | -1.24 | 1    | 0.21 | -0.96 |
| 216 | 2   | 0   | 0.8  | 3.71 | 1    | 0.18 | 2.49 | 0    | -2.49 | 1    | 0.03 | -1.91 |
| 217 | 0.5 | 1.5 | 1.45 | 3.07 | 0.25 | 0.32 | 0.34 | 0.49 | 0.14  | 0.68 | 0.54 | 0.11  |
| 218 | 2   | 0   | 1.51 | 3.01 | 1    | 0.33 | 1.33 | 0    | -1.33 | 1    | 0.11 | -1.02 |
| 219 | 0   | 0   | 0    | 4.52 | 0    | 0    | 0    | 0    | 0     | 0    | 0    | 0     |
| 220 | 2   | 0   | 0.8  | 3.71 | 1    | 0.18 | 2.49 | 0    | -2.49 | 1    | 0.03 | -1.91 |

|     |     |     |      |      |      |      |      |      |       |      |      |       |
|-----|-----|-----|------|------|------|------|------|------|-------|------|------|-------|
| 221 | 2   | 0   | 0.8  | 3.01 | 1    | 0.21 | 2.49 | 0    | -2.49 | 1    | 0.04 | -1.91 |
| 222 | 3   | 0   | 1.51 | 3.01 | 1    | 0.33 | 1.99 | 0    | -1.99 | 1    | 0.04 | -1.53 |
| 223 | 4   | 0   | 1.51 | 3.01 | 1    | 0.33 | 2.66 | 0    | -2.66 | 1    | 0.01 | -2.04 |
| 224 | 3   | 1   | 2.19 | 2.31 | 0.75 | 0.49 | 1.37 | 0.43 | -0.94 | 0.94 | 0.29 | -0.72 |
| 225 | 2   | 3   | 1.01 | 3.49 | 0.4  | 0.22 | 1.98 | 0.86 | -1.12 | 0.92 | 0.31 | -0.86 |
| 226 | 1   | 3   | 1.65 | 2.72 | 0.25 | 0.38 | 0.61 | 1.1  | 0.5   | 0.51 | 0.85 | 0.38  |
| 227 | 3   | 4   | 1.51 | 3.01 | 0.43 | 0.33 | 1.99 | 1.33 | -0.66 | 0.83 | 0.43 | -0.5  |
| 228 | 2   | 1   | 1.24 | 3.27 | 0.67 | 0.28 | 1.61 | 0.31 | -1.3  | 0.98 | 0.19 | -1    |
| 229 | 0   | 0   | 0    | 2.96 | 0    | 0    | 0    | 0    | 0     | 0    | 0    | 0     |
| 230 | 2   | 0   | 0.8  | 3.71 | 1    | 0.18 | 2.49 | 0    | -2.49 | 1    | 0.03 | -1.91 |
| 231 | 2   | 0   | 0.8  | 3.71 | 1    | 0.18 | 2.49 | 0    | -2.49 | 1    | 0.03 | -1.91 |
| 232 | 2   | 0   | 1.51 | 2.99 | 1    | 0.33 | 1.33 | 0    | -1.33 | 1    | 0.11 | -1.02 |
| 233 | 3   | 1   | 1.51 | 3.01 | 0.75 | 0.33 | 1.99 | 0.33 | -1.66 | 0.99 | 0.11 | -1.28 |
| 234 | 2   | 0   | 1.51 | 3.01 | 1    | 0.33 | 1.33 | 0    | -1.33 | 1    | 0.11 | -1.02 |
| 235 | 3   | 0   | 1.51 | 2.82 | 1    | 0.35 | 1.99 | 0    | -1.99 | 1    | 0.04 | -1.53 |
| 236 | 0   | 0   | 0    | 4.52 | 0    | 0    | 0    | 0    | 0     | 0    | 0    | 0     |
| 237 | 2.5 | 1.5 | 1.23 | 3.29 | 0.62 | 0.27 | 2.03 | 0.46 | -1.58 | 0.97 | 0.18 | -1.21 |
| 238 | 0   | 0   | 0.8  | 3.39 | 0    | 0.19 | 0    | 0    | 0     | 0    | 0    | 0     |
| 239 | 2   | 0   | 1.13 | 3.39 | 1    | 0.25 | 1.78 | 0    | -1.78 | 1    | 0.06 | -1.37 |
| 240 | 1   | 0   | 0.8  | 3.71 | 1    | 0.18 | 1.24 | 0    | -1.24 | 1    | 0.18 | -0.96 |
| 241 | 0   | 0   | 0    | 2.96 | 0    | 0    | 0    | 0    | 0     | 0    | 0    | 0     |
| 242 | 1   | 0   | 0.78 | 3.41 | 1    | 0.19 | 1.28 | 0    | -1.28 | 1    | 0.19 | -0.99 |
| 243 | 4   | 0   | 1.51 | 2.99 | 1    | 0.33 | 2.66 | 0    | -2.66 | 1    | 0.01 | -2.04 |
| 244 | 3   | 0   | 1.51 | 3.01 | 1    | 0.33 | 1.99 | 0    | -1.99 | 1    | 0.04 | -1.53 |
| 245 | 2   | 0   | 2.27 | 2.25 | 1    | 0.5  | 0.88 | 0    | -0.88 | 1    | 0.25 | -0.68 |
| 246 | 1   | 3   | 1.12 | 2.94 | 0.25 | 0.28 | 0.89 | 1.02 | 0.13  | 0.69 | 0.72 | 0.1   |
| 247 | 3   | 0   | 1.84 | 2.68 | 1    | 0.41 | 1.63 | 0    | -1.63 | 1    | 0.07 | -1.26 |
| 248 | 0   | 0   | 0.78 | 2.93 | 0    | 0.21 | 0    | 0    | 0     | 0    | 0    | 0     |
| 249 | 1   | 0   | 0.79 | 2.92 | 1    | 0.21 | 1.27 | 0    | -1.27 | 1    | 0.21 | -0.97 |
| 250 | 3   | 2   | 1.49 | 3.02 | 0.6  | 0.33 | 2.01 | 0.66 | -1.35 | 0.96 | 0.21 | -1.04 |
| 251 | 2   | 0   | 0.8  | 3.01 | 1    | 0.21 | 2.49 | 0    | -2.49 | 1    | 0.04 | -1.91 |
| 252 | 2   | 0   | 1.54 | 2.98 | 1    | 0.34 | 1.3  | 0    | -1.3  | 1    | 0.12 | -1    |
| 253 | 1   | 0   | 1.13 | 3.39 | 1    | 0.25 | 0.89 | 0    | -0.89 | 1    | 0.25 | -0.68 |
| 254 | 1   | 4   | 0.32 | 4.2  | 0.2  | 0.07 | 3.17 | 0.95 | -2.22 | 0.96 | 0.3  | -1.7  |
| 255 | 1   | 0   | 1.1  | 3.42 | 1    | 0.24 | 0.91 | 0    | -0.91 | 1    | 0.24 | -0.7  |
| 256 | 3   | 0   | 0.8  | 3.71 | 1    | 0.18 | 3.73 | 0    | -3.73 | 1    | 0.01 | -2.87 |



|     |     |     |      |      |      |      |      |      |       |      |      |       |
|-----|-----|-----|------|------|------|------|------|------|-------|------|------|-------|
| 257 | 3   | 0   | 1.51 | 3.01 | 1    | 0.33 | 1.99 | 0    | -1.99 | 1    | 0.04 | -1.53 |
| 258 | 2   | 1   | 1.51 | 3    | 0.67 | 0.34 | 1.32 | 0.33 | -0.99 | 0.96 | 0.26 | -0.76 |
| 259 | 0   | 0   | 0    | 4.52 | 0    | 0    | 0    | 0    | 0     | 0    | 0    | 0     |
| 260 | 3   | 0   | 1.51 | 3.01 | 1    | 0.33 | 1.99 | 0    | -1.99 | 1    | 0.04 | -1.53 |
| 261 | 5   | 0   | 2.03 | 2.47 | 1    | 0.45 | 2.46 | 0    | -2.46 | 1    | 0.02 | -1.89 |
| 262 | 2   | 1   | 1.49 | 3.03 | 0.67 | 0.33 | 1.35 | 0.33 | -1.02 | 0.96 | 0.25 | -0.78 |
| 263 | 1   | 0   | 0.8  | 3.71 | 1    | 0.18 | 1.24 | 0    | -1.24 | 1    | 0.18 | -0.96 |
| 264 | 2   | 0   | 1.13 | 3.39 | 1    | 0.25 | 1.78 | 0    | -1.78 | 1    | 0.06 | -1.37 |
| 265 | 2   | 0   | 0.78 | 3.41 | 1    | 0.19 | 2.55 | 0    | -2.55 | 1    | 0.03 | -1.96 |
| 266 | 2   | 0   | 0.8  | 3.01 | 1    | 0.21 | 2.49 | 0    | -2.49 | 1    | 0.04 | -1.91 |
| 267 | 1   | 0   | 2.18 | 2.34 | 1    | 0.48 | 0.46 | 0    | -0.46 | 1    | 0.48 | -0.35 |
| 268 | 4   | 0   | 1.51 | 3.01 | 1    | 0.33 | 2.66 | 0    | -2.66 | 1    | 0.01 | -2.04 |
| 269 | 1   | 0   | 0.78 | 3.37 | 1    | 0.19 | 1.28 | 0    | -1.28 | 1    | 0.19 | -0.98 |
| 270 | 0   | 0   | 0    | 2.96 | 0    | 0    | 0    | 0    | 0     | 0    | 0    | 0     |
| 271 | 3   | 0   | 1.51 | 2.82 | 1    | 0.35 | 1.99 | 0    | -1.99 | 1    | 0.04 | -1.53 |
| 272 | 3   | 0   | 1.51 | 3.01 | 1    | 0.33 | 1.99 | 0    | -1.99 | 1    | 0.04 | -1.53 |
| 273 | 0   | 0   | 0    | 2.96 | 0    | 0    | 0    | 0    | 0     | 0    | 0    | 0     |
| 274 | 0   | 0   | 1.51 | 3.01 | 0    | 0.33 | 0    | 0    | 0     | 0    | 0    | 0     |
| 275 | 3   | 0   | 1.1  | 3.42 | 1    | 0.24 | 2.72 | 0    | -2.72 | 1    | 0.01 | -2.09 |
| 276 | 2   | 0   | 2.21 | 2.28 | 1    | 0.49 | 0.91 | 0    | -0.91 | 1    | 0.24 | -0.7  |
| 277 | 3   | 0   | 1.51 | 2.79 | 1    | 0.35 | 1.99 | 0    | -1.99 | 1    | 0.04 | -1.53 |
| 278 | 0   | 1   | 1.51 | 3.01 | 0    | 0.33 | 0    | 0.33 | 0.33  | 0.67 | 0.33 | 0.26  |
| 279 | 2   | 0   | 1.13 | 3.39 | 1    | 0.25 | 1.78 | 0    | -1.78 | 1    | 0.06 | -1.37 |
| 280 | 3   | 0   | 1.51 | 3.01 | 1    | 0.33 | 1.99 | 0    | -1.99 | 1    | 0.04 | -1.53 |
| 281 | 2   | 2   | 1.45 | 3.07 | 0.5  | 0.32 | 1.38 | 0.65 | -0.72 | 0.9  | 0.39 | -0.56 |
| 282 | 2   | 0   | 0.8  | 3.01 | 1    | 0.21 | 2.49 | 0    | -2.49 | 1    | 0.04 | -1.91 |
| 283 | 1   | 0   | 0.8  | 3.71 | 1    | 0.18 | 1.24 | 0    | -1.24 | 1    | 0.18 | -0.96 |
| 284 | 2   | 0   | 2.01 | 2.51 | 1    | 0.44 | 1    | 0    | -1    | 1    | 0.2  | -0.77 |
| 285 | 2.5 | 2.5 | 1.51 | 3.01 | 0.5  | 0.33 | 1.66 | 0.83 | -0.82 | 0.87 | 0.38 | -0.63 |
| 286 | 4   | 0   | 1.51 | 3.01 | 1    | 0.33 | 2.66 | 0    | -2.66 | 1    | 0.01 | -2.04 |
| 287 | 2   | 0   | 1.51 | 3.01 | 1    | 0.33 | 1.33 | 0    | -1.33 | 1    | 0.11 | -1.02 |
| 288 | 4   | 0   | 2.2  | 2.28 | 1    | 0.49 | 1.82 | 0    | -1.82 | 1    | 0.06 | -1.4  |
| 289 | 2.5 | 1.5 | 0.82 | 3.36 | 0.62 | 0.2  | 3.03 | 0.45 | -2.59 | 0.99 | 0.1  | -1.99 |
| 290 | 2   | 0   | 1.51 | 3.01 | 1    | 0.33 | 1.33 | 0    | -1.33 | 1    | 0.11 | -1.02 |
| 291 | 1   | 0   | 0.81 | 3.39 | 1    | 0.19 | 1.23 | 0    | -1.23 | 1    | 0.19 | -0.95 |
| 292 | 3   | 0   | 1.51 | 2.99 | 1    | 0.33 | 1.99 | 0    | -1.99 | 1    | 0.04 | -1.53 |

|     |      |      |      |      |      |      |      |      |       |      |      |       |
|-----|------|------|------|------|------|------|------|------|-------|------|------|-------|
| 293 | 4    | 0    | 1.51 | 3.01 | 1    | 0.33 | 2.66 | 0    | -2.66 | 1    | 0.01 | -2.04 |
| 294 | 4    | 0    | 2.16 | 2.33 | 1    | 0.48 | 1.85 | 0    | -1.85 | 1    | 0.05 | -1.43 |
| 295 | 4    | 0    | 1.21 | 3.26 | 1    | 0.27 | 3.31 | 0    | -3.31 | 1    | 0.01 | -2.55 |
| 296 | 0    | 0    | 0    | 4.52 | 0    | 0    | 0    | 0    | 0     | 0    | 0    | 0     |
| 297 | 4    | 0    | 2.19 | 2.3  | 1    | 0.49 | 1.83 | 0    | -1.83 | 1    | 0.06 | -1.41 |
| 298 | 3    | 0    | 1.51 | 3.01 | 1    | 0.33 | 1.99 | 0    | -1.99 | 1    | 0.04 | -1.53 |
| 299 | 2    | 0    | 0.82 | 3.34 | 1    | 0.2  | 2.45 | 0    | -2.45 | 1    | 0.04 | -1.88 |
| 300 | 3    | 0    | 1.51 | 3.01 | 1    | 0.33 | 1.99 | 0    | -1.99 | 1    | 0.04 | -1.53 |
| 301 | 3    | 0    | 1.51 | 3.01 | 1    | 0.33 | 1.99 | 0    | -1.99 | 1    | 0.04 | -1.53 |
| 302 | 2    | 0    | 0.8  | 2.91 | 1    | 0.22 | 2.49 | 0    | -2.49 | 1    | 0.05 | -1.92 |
| 303 | 3    | 0    | 0.8  | 3.35 | 1    | 0.19 | 3.73 | 0    | -3.73 | 1    | 0.01 | -2.87 |
| 304 | 2    | 0    | 1.21 | 2.99 | 1    | 0.29 | 1.65 | 0    | -1.65 | 1    | 0.08 | -1.27 |
| 305 | 3    | 0    | 0.8  | 3.71 | 1    | 0.18 | 3.73 | 0    | -3.73 | 1    | 0.01 | -2.87 |
| 306 | 1    | 0    | 0.78 | 3.37 | 1    | 0.19 | 1.28 | 0    | -1.28 | 1    | 0.19 | -0.99 |
| 307 | 0    | 0    | 1.51 | 3.01 | 0    | 0.33 | 0    | 0    | 0     | 0    | 0    | 0     |
| 308 | 2    | 0    | 0.73 | 3.79 | 1    | 0.16 | 2.75 | 0    | -2.75 | 1    | 0.03 | -2.11 |
| 309 | 3    | 0    | 0.8  | 3.71 | 1    | 0.18 | 3.73 | 0    | -3.73 | 1    | 0.01 | -2.87 |
| 310 | 0    | 0    | 1.51 | 3.01 | 0    | 0.33 | 0    | 0    | 0     | 0    | 0    | 0     |
| 311 | 3    | 0    | 1.51 | 3.01 | 1    | 0.33 | 1.99 | 0    | -1.99 | 1    | 0.04 | -1.53 |
| 312 | 3    | 0    | 1.55 | 2.97 | 1    | 0.34 | 1.93 | 0    | -1.93 | 1    | 0.04 | -1.49 |
| 313 | 2    | 0    | 0.73 | 3.79 | 1    | 0.16 | 2.75 | 0    | -2.75 | 1    | 0.03 | -2.12 |
| 314 | 2    | 0    | 0.8  | 3.01 | 1    | 0.21 | 2.49 | 0    | -2.49 | 1    | 0.04 | -1.91 |
| 315 | 2    | 0    | 1.51 | 2.71 | 1    | 0.36 | 1.33 | 0    | -1.33 | 1    | 0.13 | -1.02 |
| 316 | 1    | 0    | 1.51 | 3.01 | 1    | 0.33 | 0.66 | 0    | -0.66 | 1    | 0.33 | -0.51 |
| 317 | 1    | 0    | 1.51 | 3.01 | 1    | 0.33 | 0.66 | 0    | -0.66 | 1    | 0.33 | -0.51 |
| 318 | 0    | 0    | 0    | 4.52 | 0    | 0    | 0    | 0    | 0     | 0    | 0    | 0     |
| 319 | 0.5  | 3.5  | 0.7  | 3.82 | 0.12 | 0.15 | 0.72 | 0.92 | 0.2   | 0.7  | 0.49 | 0.15  |
| 320 | 0    | 0    | 0    | 2.96 | 0    | 0    | 0    | 0    | 0     | 0    | 0    | 0     |
| 321 | 3    | 2    | 1.43 | 3.09 | 0.6  | 0.32 | 2.1  | 0.65 | -1.45 | 0.96 | 0.19 | -1.12 |
| 322 | 4    | 0    | 1.51 | 3.01 | 1    | 0.33 | 2.66 | 0    | -2.66 | 1    | 0.01 | -2.04 |
| 323 | 2    | 0    | 1.51 | 2.8  | 1    | 0.35 | 1.33 | 0    | -1.33 | 1    | 0.12 | -1.02 |
| 324 | 0    | 0    | 0    | 4.52 | 0    | 0    | 0    | 0    | 0     | 0    | 0    | 0     |
| 325 | 5    | 0    | 1.51 | 3.01 | 1    | 0.33 | 3.32 | 0    | -3.32 | 1    | 0    | -2.55 |
| 326 | 1    | 4    | 0.8  | 3.42 | 0.2  | 0.19 | 1.24 | 1.17 | -0.08 | 0.76 | 0.65 | -0.06 |
| 327 | 0    | 0    | 0    | 0    | 0    | 0    | 0    | 0    | 0     | 0    | 0    | 0     |
| 328 | 1.33 | 4.67 | 1.78 | 2.25 | 0.22 | 0.44 | 0.75 | 2.07 | 1.32  | 0.27 | 0.92 | 1.02  |

|     |      |      |      |      |      |      |      |      |       |      |      |       |
|-----|------|------|------|------|------|------|------|------|-------|------|------|-------|
| 329 | 1    | 3    | 0.84 | 3.66 | 0.25 | 0.19 | 1.19 | 0.82 | -0.37 | 0.84 | 0.56 | -0.28 |
| 330 | 3    | 4    | 1.48 | 3.04 | 0.43 | 0.33 | 2.02 | 1.32 | -0.71 | 0.83 | 0.42 | -0.54 |
| 331 | 2.5  | 5.5  | 1.47 | 3.03 | 0.31 | 0.33 | 1.7  | 1.82 | 0.12  | 0.62 | 0.66 | 0.09  |
| 332 | 2    | 5    | 1.49 | 2.96 | 0.29 | 0.33 | 1.34 | 1.69 | 0.35  | 0.57 | 0.74 | 0.27  |
| 333 | 4    | 6    | 0.98 | 3.12 | 0.4  | 0.24 | 4.08 | 1.92 | -2.16 | 0.93 | 0.2  | -1.66 |
| 334 | 2    | 0    | 1.51 | 2.69 | 1    | 0.36 | 1.33 | 0    | -1.33 | 1    | 0.13 | -1.02 |
| 335 | 3    | 4    | 1.32 | 2.74 | 0.43 | 0.33 | 2.27 | 1.46 | -0.81 | 0.84 | 0.41 | -0.62 |
| 336 | 3.5  | 2.5  | 1.18 | 1.99 | 0.58 | 0.37 | 2.97 | 1.26 | -1.71 | 0.91 | 0.27 | -1.32 |
| 337 | 1    | 3    | 0.56 | 2.27 | 0.25 | 0.2  | 1.78 | 1.32 | -0.46 | 0.82 | 0.59 | -0.35 |
| 338 | 1.5  | 2.5  | 0.85 | 2.15 | 0.38 | 0.28 | 1.77 | 1.16 | -0.61 | 0.81 | 0.53 | -0.47 |
| 339 | 2    | 2    | 1.04 | 2.15 | 0.5  | 0.33 | 1.92 | 0.93 | -0.99 | 0.9  | 0.39 | -0.76 |
| 340 | 1    | 4    | 0.48 | 2.18 | 0.2  | 0.18 | 2.07 | 1.84 | -0.23 | 0.77 | 0.63 | -0.18 |
| 341 | 0    | 0    | 0    | 0    | 0    | 0    | 0    | 0    | 0     | 0    | 0    | 0     |
| 342 | 0    | 0    | 0    | 0    | 0    | 0    | 0    | 0    | 0     | 0    | 0    | 0     |
| 343 | 0    | 0    | 0    | 0    | 0    | 0    | 0    | 0    | 0     | 0    | 0    | 0     |
| 344 | 0    | 0    | 0    | 0    | 0    | 0    | 0    | 0    | 0     | 0    | 0    | 0     |
| 345 | 0    | 0    | 0    | 0    | 0    | 0    | 0    | 0    | 0     | 0    | 0    | 0     |
| 346 | 0    | 0    | 0    | 0    | 0    | 0    | 0    | 0    | 0     | 0    | 0    | 0     |
| 347 | 0    | 0    | 0    | 0    | 0    | 0    | 0    | 0    | 0     | 0    | 0    | 0     |
| 348 | 0    | 0    | 0    | 0    | 0    | 0    | 0    | 0    | 0     | 0    | 0    | 0     |
| 349 | 0    | 0    | 0    | 0    | 0    | 0    | 0    | 0    | 0     | 0    | 0    | 0     |
| 350 | 0    | 0    | 0    | 0    | 0    | 0    | 0    | 0    | 0     | 0    | 0    | 0     |
| 351 | 0    | 0    | 0    | 0    | 0    | 0    | 0    | 0    | 0     | 0    | 0    | 0     |
| 352 | 0    | 0    | 0    | 0    | 0    | 0    | 0    | 0    | 0     | 0    | 0    | 0     |
| 353 | 0    | 0    | 0    | 0    | 0    | 0    | 0    | 0    | 0     | 0    | 0    | 0     |
| 354 | 0    | 0    | 0    | 0    | 0    | 0    | 0    | 0    | 0     | 0    | 0    | 0     |
| 355 | 0    | 0    | 0    | 0    | 0    | 0    | 0    | 0    | 0     | 0    | 0    | 0     |
| 356 | 2.17 | 2.83 | 0.75 | 3.35 | 0.43 | 0.18 | 2.88 | 0.84 | -2.03 | 0.96 | 0.2  | -1.57 |
| 357 | 6    | 2    | 1.64 | 2.54 | 0.75 | 0.39 | 3.67 | 0.79 | -2.88 | 0.99 | 0.05 | -2.21 |
| 358 | 1.5  | 4.5  | 0.84 | 3.34 | 0.25 | 0.2  | 1.78 | 1.35 | -0.44 | 0.78 | 0.54 | -0.34 |
| 359 | 3    | 4    | 0.87 | 3.65 | 0.43 | 0.19 | 3.44 | 1.1  | -2.34 | 0.97 | 0.14 | -1.8  |
| 360 | 3    | 5    | 1.02 | 3.26 | 0.38 | 0.24 | 2.95 | 1.53 | -1.42 | 0.9  | 0.29 | -1.09 |
| 361 | 2.5  | 1.5  | 0.85 | 3.32 | 0.62 | 0.2  | 2.93 | 0.45 | -2.48 | 0.98 | 0.11 | -1.91 |
| 362 | 2.5  | 3.5  | 1.19 | 3.14 | 0.42 | 0.28 | 2.09 | 1.12 | -0.98 | 0.87 | 0.37 | -0.75 |
| 363 | 3    | 4    | 1.49 | 3.02 | 0.43 | 0.33 | 2.01 | 1.32 | -0.68 | 0.83 | 0.42 | -0.53 |
| 364 | 2    | 5    | 0.78 | 3.43 | 0.29 | 0.19 | 2.56 | 1.46 | -1.1  | 0.88 | 0.38 | -0.84 |

|     |      |      |      |      |      |      |      |      |       |      |      |       |
|-----|------|------|------|------|------|------|------|------|-------|------|------|-------|
| 365 | 1.25 | 7.75 | 0.86 | 3.55 | 0.14 | 0.19 | 1.45 | 2.18 | 0.73  | 0.53 | 0.78 | 0.56  |
| 366 | 3.33 | 3.67 | 1    | 3.5  | 0.48 | 0.22 | 3.34 | 1.05 | -2.29 | 0.97 | 0.14 | -1.76 |
| 367 | 2.5  | 5.5  | 1.14 | 3.34 | 0.31 | 0.25 | 2.19 | 1.64 | -0.55 | 0.77 | 0.49 | -0.42 |
| 368 | 3    | 3    | 1.46 | 3.03 | 0.5  | 0.33 | 2.05 | 0.99 | -1.06 | 0.91 | 0.3  | -0.82 |
| 369 | 1    | 3    | 0.82 | 3.35 | 0.25 | 0.2  | 1.22 | 0.9  | -0.32 | 0.82 | 0.58 | -0.25 |
| 370 | 3    | 3    | 1.33 | 3.02 | 0.5  | 0.31 | 2.25 | 0.99 | -1.26 | 0.92 | 0.27 | -0.97 |
| 371 | 3    | 3    | 1.51 | 2.5  | 0.5  | 0.38 | 1.99 | 1.2  | -0.79 | 0.85 | 0.41 | -0.6  |
| 372 | 1.17 | 5.83 | 0.81 | 3.24 | 0.17 | 0.2  | 1.45 | 1.8  | 0.35  | 0.62 | 0.73 | 0.27  |
| 373 | 4    | 4    | 1.48 | 3.01 | 0.5  | 0.33 | 2.7  | 1.33 | -1.37 | 0.92 | 0.25 | -1.06 |
| 374 | 1.5  | 5.5  | 0.79 | 3.06 | 0.21 | 0.2  | 1.9  | 1.8  | -0.11 | 0.7  | 0.62 | -0.08 |
| 375 | 2.5  | 4.5  | 1.32 | 2.78 | 0.36 | 0.32 | 1.89 | 1.62 | -0.27 | 0.72 | 0.56 | -0.21 |
| 376 | 1.5  | 3.5  | 0.95 | 2.98 | 0.3  | 0.24 | 1.58 | 1.18 | -0.41 | 0.78 | 0.55 | -0.31 |
| 377 | 3    | 3    | 0.9  | 2.96 | 0.5  | 0.23 | 3.35 | 1.01 | -2.34 | 0.97 | 0.14 | -1.8  |
| 378 | 3    | 2    | 1.17 | 2.45 | 0.6  | 0.32 | 2.55 | 0.81 | -1.74 | 0.96 | 0.2  | -1.34 |
| 379 | 3    | 2    | 1.23 | 2.36 | 0.6  | 0.34 | 2.44 | 0.85 | -1.59 | 0.95 | 0.22 | -1.22 |
| 380 | 2.5  | 3.5  | 1.28 | 2.43 | 0.42 | 0.34 | 1.96 | 1.44 | -0.52 | 0.77 | 0.51 | -0.4  |
| 381 | 1    | 5    | 1.31 | 2.8  | 0.17 | 0.32 | 0.76 | 1.79 | 1.03  | 0.38 | 0.9  | 0.79  |
| 382 | 1.5  | 4.5  | 1.29 | 2.8  | 0.25 | 0.31 | 1.17 | 1.61 | 0.44  | 0.55 | 0.75 | 0.34  |
| 383 | 1    | 4    | 0.84 | 3.34 | 0.2  | 0.2  | 1.19 | 1.2  | 0.01  | 0.73 | 0.68 | 0.01  |
| 384 | 2.67 | 3.33 | 1.46 | 2.7  | 0.44 | 0.35 | 1.82 | 1.24 | -0.59 | 0.8  | 0.47 | -0.45 |
| 385 | 3    | 4    | 1.51 | 2.98 | 0.43 | 0.34 | 1.99 | 1.34 | -0.65 | 0.82 | 0.44 | -0.5  |
| 386 | 2    | 3    | 0.82 | 3.36 | 0.4  | 0.2  | 2.43 | 0.89 | -1.54 | 0.94 | 0.26 | -1.19 |
| 387 | 1    | 2    | 0.79 | 3.46 | 0.33 | 0.18 | 1.27 | 0.58 | -0.7  | 0.91 | 0.46 | -0.53 |
| 388 | 2    | 6    | 1.81 | 2.71 | 0.25 | 0.4  | 1.11 | 2.21 | 1.1   | 0.32 | 0.89 | 0.85  |
| 389 | 1    | 3    | 0.85 | 3.34 | 0.25 | 0.2  | 1.18 | 0.9  | -0.28 | 0.82 | 0.6  | -0.22 |
| 390 | 0    | 0    | 0    | 0    | 0    | 0    | 0    | 0    | 0     | 0    | 0    | 0     |
| 391 | 0    | 0    | 0    | 0    | 0    | 0    | 0    | 0    | 0     | 0    | 0    | 0     |
| 392 | 1    | 2    | 0.65 | 2.64 | 0.33 | 0.2  | 1.53 | 0.76 | -0.77 | 0.9  | 0.49 | -0.59 |
| 393 | 0    | 0    | 0.7  | 3.01 | 0    | 0.19 | 0    | 0    | 0     | 0    | 0    | 0     |
| 394 | 2    | 2    | 0.83 | 3.34 | 0.5  | 0.2  | 2.4  | 0.6  | -1.8  | 0.97 | 0.18 | -1.38 |
| 395 | 0    | 1    | 0.82 | 3.42 | 0    | 0.19 | 0    | 0.29 | 0.29  | 0.81 | 0.19 | 0.22  |
| 396 | 2    | 0    | 1.32 | 2.88 | 1    | 0.31 | 1.51 | 0    | -1.51 | 1    | 0.1  | -1.17 |
| 397 | 4    | 0    | 1.51 | 2.97 | 1    | 0.34 | 2.66 | 0    | -2.66 | 1    | 0.01 | -2.04 |
| 398 | 1    | 0    | 1.51 | 3.01 | 1    | 0.33 | 0.66 | 0    | -0.66 | 1    | 0.33 | -0.51 |
| 399 | 0    | 0    | 0.78 | 3.42 | 0    | 0.19 | 0    | 0    | 0     | 0    | 0    | 0     |
| 400 | 5    | 1    | 1.55 | 2.96 | 0.83 | 0.34 | 3.22 | 0.34 | -2.88 | 1    | 0.02 | -2.22 |

|     |     |     |      |      |      |      |      |      |       |      |      |       |
|-----|-----|-----|------|------|------|------|------|------|-------|------|------|-------|
| 401 | 4   | 0   | 1.51 | 2.99 | 1    | 0.33 | 2.66 | 0    | -2.66 | 1    | 0.01 | -2.04 |
| 402 | 3   | 0   | 1.61 | 2.91 | 1    | 0.36 | 1.86 | 0    | -1.86 | 1    | 0.05 | -1.43 |
| 403 | 1   | 0   | 1.51 | 2.67 | 1    | 0.36 | 0.66 | 0    | -0.66 | 1    | 0.36 | -0.51 |
| 404 | 1   | 0   | 0.8  | 3.71 | 1    | 0.18 | 1.24 | 0    | -1.24 | 1    | 0.18 | -0.96 |
| 405 | 0   | 0   | 0.8  | 3.71 | 0    | 0.18 | 0    | 0    | 0     | 0    | 0    | 0     |
| 406 | 1   | 0   | 1.1  | 3.42 | 1    | 0.24 | 0.91 | 0    | -0.91 | 1    | 0.24 | -0.7  |
| 407 | 0   | 0   | 0.8  | 3.71 | 0    | 0.18 | 0    | 0    | 0     | 0    | 0    | 0     |
| 408 | 0   | 0   | 0.8  | 3.01 | 0    | 0.21 | 0    | 0    | 0     | 0    | 0    | 0     |
| 409 | 2   | 0   | 0.8  | 3.71 | 1    | 0.18 | 2.49 | 0    | -2.49 | 1    | 0.03 | -1.91 |
| 410 | 4   | 0   | 1.51 | 3.01 | 1    | 0.33 | 2.66 | 0    | -2.66 | 1    | 0.01 | -2.04 |
| 411 | 2   | 0   | 2.27 | 2.25 | 1    | 0.5  | 0.88 | 0    | -0.88 | 1    | 0.25 | -0.68 |
| 412 | 1   | 0   | 1.51 | 3.01 | 1    | 0.33 | 0.66 | 0    | -0.66 | 1    | 0.33 | -0.51 |
| 413 | 3   | 0   | 1.51 | 2.98 | 1    | 0.34 | 1.99 | 0    | -1.99 | 1    | 0.04 | -1.53 |
| 414 | 1   | 0   | 0.81 | 3.39 | 1    | 0.19 | 1.24 | 0    | -1.24 | 1    | 0.19 | -0.96 |
| 415 | 3   | 0   | 1.51 | 3.01 | 1    | 0.33 | 1.99 | 0    | -1.99 | 1    | 0.04 | -1.53 |
| 416 | 4   | 0   | 1.51 | 3.01 | 1    | 0.33 | 2.66 | 0    | -2.66 | 1    | 0.01 | -2.04 |
| 417 | 2   | 0   | 1.51 | 3.01 | 1    | 0.33 | 1.33 | 0    | -1.33 | 1    | 0.11 | -1.02 |
| 418 | 2   | 0   | 1.51 | 3.01 | 1    | 0.33 | 1.33 | 0    | -1.33 | 1    | 0.11 | -1.02 |
| 419 | 3   | 1   | 1.51 | 2.99 | 0.75 | 0.33 | 1.99 | 0.33 | -1.66 | 0.99 | 0.11 | -1.28 |
| 420 | 2   | 1   | 0.58 | 2.66 | 0.67 | 0.18 | 3.47 | 0.38 | -3.09 | 0.99 | 0.08 | -2.38 |
| 421 | 1   | 0   | 1.51 | 2.71 | 1    | 0.36 | 0.66 | 0    | -0.66 | 1    | 0.36 | -0.51 |
| 422 | 1   | 0   | 0.8  | 3.71 | 1    | 0.18 | 1.24 | 0    | -1.24 | 1    | 0.18 | -0.96 |
| 423 | 0   | 0   | 0    | 2.96 | 0    | 0    | 0    | 0    | 0     | 0    | 0    | 0     |
| 424 | 3   | 1   | 0.8  | 3.71 | 0.75 | 0.18 | 3.73 | 0.27 | -3.46 | 1    | 0.02 | -2.66 |
| 425 | 4   | 0   | 1.51 | 3.01 | 1    | 0.33 | 2.66 | 0    | -2.66 | 1    | 0.01 | -2.04 |
| 426 | 3   | 0   | 1.51 | 3.01 | 1    | 0.33 | 1.99 | 0    | -1.99 | 1    | 0.04 | -1.53 |
| 427 | 1   | 0   | 2.13 | 2.31 | 1    | 0.48 | 0.47 | 0    | -0.47 | 1    | 0.48 | -0.36 |
| 428 | 2   | 0   | 1.51 | 3.01 | 1    | 0.33 | 1.33 | 0    | -1.33 | 1    | 0.11 | -1.02 |
| 429 | 3   | 0   | 0.8  | 3.39 | 1    | 0.19 | 3.73 | 0    | -3.73 | 1    | 0.01 | -2.87 |
| 430 | 1   | 0   | 0.8  | 3.71 | 1    | 0.18 | 1.24 | 0    | -1.24 | 1    | 0.18 | -0.96 |
| 431 | 2.5 | 1.5 | 1.46 | 3.06 | 0.62 | 0.32 | 1.71 | 0.49 | -1.22 | 0.94 | 0.25 | -0.94 |
| 432 | 0   | 0   | 1.51 | 3.01 | 0    | 0.33 | 0    | 0    | 0     | 0    | 0    | 0     |
| 433 | 2   | 0   | 1.13 | 3.39 | 1    | 0.25 | 1.78 | 0    | -1.78 | 1    | 0.06 | -1.37 |
| 434 | 2   | 1   | 1.55 | 2.95 | 0.67 | 0.34 | 1.29 | 0.34 | -0.95 | 0.96 | 0.27 | -0.73 |
| 435 | 2   | 0   | 1.01 | 3.5  | 1    | 0.22 | 1.97 | 0    | -1.97 | 1    | 0.05 | -1.52 |
| 436 | 3   | 0   | 1.51 | 3.01 | 1    | 0.33 | 1.99 | 0    | -1.99 | 1    | 0.04 | -1.53 |

|     |   |   |      |      |      |      |      |      |       |      |      |       |
|-----|---|---|------|------|------|------|------|------|-------|------|------|-------|
| 437 | 4 | 0 | 1.96 | 2.41 | 1    | 0.45 | 2.04 | 0    | -2.04 | 1    | 0.04 | -1.57 |
| 438 | 0 | 0 | 0.8  | 3.39 | 0    | 0.19 | 0    | 0    | 0     | 0    | 0    | 0     |
| 439 | 3 | 0 | 2.21 | 2.28 | 1    | 0.49 | 1.36 | 0    | -1.36 | 1    | 0.12 | -1.04 |
| 440 | 2 | 0 | 1.51 | 3.01 | 1    | 0.33 | 1.33 | 0    | -1.33 | 1    | 0.11 | -1.02 |
| 441 | 3 | 0 | 1.59 | 2.93 | 1    | 0.35 | 1.89 | 0    | -1.89 | 1    | 0.04 | -1.46 |
| 442 | 3 | 0 | 2.09 | 2.33 | 1    | 0.47 | 1.44 | 0    | -1.44 | 1    | 0.11 | -1.11 |
| 443 | 2 | 0 | 1.89 | 2.44 | 1    | 0.44 | 1.06 | 0    | -1.06 | 1    | 0.19 | -0.81 |
| 444 | 4 | 0 | 1.98 | 2.53 | 1    | 0.44 | 2.02 | 0    | -2.02 | 1    | 0.04 | -1.56 |
| 445 | 3 | 0 | 1.51 | 3.01 | 1    | 0.33 | 1.99 | 0    | -1.99 | 1    | 0.04 | -1.53 |
| 446 | 3 | 1 | 1.42 | 3.1  | 0.75 | 0.31 | 2.12 | 0.32 | -1.8  | 0.99 | 0.09 | -1.38 |
| 447 | 1 | 0 | 0.8  | 3.71 | 1    | 0.18 | 1.24 | 0    | -1.24 | 1    | 0.18 | -0.96 |
| 448 | 0 | 0 | 0.78 | 3.42 | 0    | 0.19 | 0    | 0    | 0     | 0    | 0    | 0     |
| 449 | 1 | 0 | 0.79 | 3.41 | 1    | 0.19 | 1.27 | 0    | -1.27 | 1    | 0.19 | -0.97 |
| 450 | 3 | 0 | 1.51 | 3.01 | 1    | 0.33 | 1.99 | 0    | -1.99 | 1    | 0.04 | -1.53 |
| 451 | 4 | 0 | 2.19 | 2.31 | 1    | 0.49 | 1.83 | 0    | -1.83 | 1    | 0.06 | -1.41 |
| 452 | 4 | 0 | 1.51 | 3.01 | 1    | 0.33 | 2.66 | 0    | -2.66 | 1    | 0.01 | -2.04 |
| 453 | 2 | 0 | 1.51 | 3.01 | 1    | 0.33 | 1.33 | 0    | -1.33 | 1    | 0.11 | -1.02 |
| 454 | 4 | 0 | 1.63 | 2.89 | 1    | 0.36 | 2.46 | 0    | -2.46 | 1    | 0.02 | -1.89 |
| 455 | 2 | 0 | 1.51 | 3.01 | 1    | 0.33 | 1.33 | 0    | -1.33 | 1    | 0.11 | -1.02 |
| 456 | 1 | 0 | 1.13 | 3.39 | 1    | 0.25 | 0.89 | 0    | -0.89 | 1    | 0.25 | -0.68 |
| 457 | 1 | 0 | 1.51 | 3.01 | 1    | 0.33 | 0.66 | 0    | -0.66 | 1    | 0.33 | -0.51 |
| 458 | 0 | 0 | 1.13 | 3.39 | 0    | 0.25 | 0    | 0    | 0     | 0    | 0    | 0     |
| 459 | 1 | 0 | 1.51 | 3.01 | 1    | 0.33 | 0.66 | 0    | -0.66 | 1    | 0.33 | -0.51 |
| 460 | 3 | 0 | 0.8  | 3.71 | 1    | 0.18 | 3.73 | 0    | -3.73 | 1    | 0.01 | -2.87 |
| 461 | 3 | 0 | 1.51 | 3.01 | 1    | 0.33 | 1.99 | 0    | -1.99 | 1    | 0.04 | -1.53 |
| 462 | 2 | 0 | 1.83 | 2.61 | 1    | 0.41 | 1.1  | 0    | -1.1  | 1    | 0.17 | -0.84 |
| 463 | 0 | 1 | 1.15 | 3.37 | 0    | 0.25 | 0    | 0.3  | 0.3   | 0.75 | 0.25 | 0.23  |
| 464 | 2 | 0 | 0.8  | 3.71 | 1    | 0.18 | 2.49 | 0    | -2.49 | 1    | 0.03 | -1.91 |
| 465 | 0 | 0 | 0.8  | 3.01 | 0    | 0.21 | 0    | 0    | 0     | 0    | 0    | 0     |
| 466 | 1 | 0 | 0.8  | 3.71 | 1    | 0.18 | 1.24 | 0    | -1.24 | 1    | 0.18 | -0.96 |
| 467 | 3 | 0 | 1.51 | 2.98 | 1    | 0.34 | 1.99 | 0    | -1.99 | 1    | 0.04 | -1.53 |
| 468 | 2 | 0 | 1.51 | 3.01 | 1    | 0.33 | 1.33 | 0    | -1.33 | 1    | 0.11 | -1.02 |
| 469 | 2 | 0 | 0.8  | 3.71 | 1    | 0.18 | 2.49 | 0    | -2.49 | 1    | 0.03 | -1.91 |
| 470 | 2 | 2 | 0.81 | 3.7  | 0.5  | 0.18 | 2.47 | 0.54 | -1.93 | 0.98 | 0.15 | -1.49 |
| 471 | 3 | 1 | 1.83 | 2.69 | 0.75 | 0.4  | 1.64 | 0.37 | -1.27 | 0.97 | 0.18 | -0.98 |
| 472 | 3 | 0 | 1.51 | 3.01 | 1    | 0.33 | 1.99 | 0    | -1.99 | 1    | 0.04 | -1.53 |



## Supplementary File 6

### Lineage specific dn/ds values Kindlins.

| Branch Name | Mean    | Std.Dev. | 2.50%   | Median  | 97.50%  | Prob{dN>dS}† |
|-------------|---------|----------|---------|---------|---------|--------------|
| PSN_1_HS    | 0.08382 | 0.13     | 0.04124 | 0.04521 | 0.78095 | 0            |
| PSN_1_PT    | 0.78069 | 0.0174   | 0.78036 | 0.78174 | 0.78483 | 0            |
| Node6       | 0.1163  | 0.03054  | 0.04577 | 0.12884 | 0.13269 | 0            |
| PSN_1_BT    | 0.13873 | 0.0201   | 0.12635 | 0.12948 | 0.18787 | 0            |
| Node5       | 0.14722 | 0.02813  | 0.12588 | 0.13023 | 0.19449 | 0            |
| PSN_RN      | 0.13124 | 0.01591  | 0.12315 | 0.12931 | 0.18401 | 0            |
| PSN_1_MM    | 0.04582 | 0.00712  | 0.04149 | 0.04518 | 0.04877 | 0            |
| Node10      | 0.04514 | 0.00217  | 0.04124 | 0.04517 | 0.04749 | 0            |
| Node4       | 0.18221 | 0.01879  | 0.13166 | 0.18748 | 0.19719 | 0            |
| PSN_1_AC    | 0.13067 | 0.00721  | 0.12588 | 0.12933 | 0.15825 | 0            |
| Node3       | 0.133   | 0.01344  | 0.12588 | 0.12933 | 0.18577 | 0            |
| PSN_1_XL    | 0.04591 | 0.00226  | 0.04396 | 0.04524 | 0.05381 | 0            |
| Node2       | 0.04493 | 0.00142  | 0.0404  | 0.04514 | 0.04665 | 0            |
| PSN_1_TR    | 0.12931 | 0.0031   | 0.12539 | 0.12926 | 0.13474 | 0            |
| PSN_1_DR    | 0.12975 | 0.00437  | 0.1251  | 0.12928 | 0.13597 | 0            |
| Node15      | 0.18603 | 0.01442  | 0.13351 | 0.18899 | 0.19906 | 0            |
| Node1       | 0.18869 | 0.00912  | 0.16987 | 0.1912  | 0.19948 | 0            |
| PSN_2_HS    | 0.05053 | 0.02951  | 0.03999 | 0.04517 | 0.13162 | 0            |
| PSN_2_PT    | 0.07069 | 0.05304  | 0.04217 | 0.0455  | 0.18982 | 0            |
| Node21      | 0.04418 | 0.00421  | 0.02545 | 0.04508 | 0.04698 | 0            |
| PSN_2_BT    | 0.04522 | 0.00223  | 0.0415  | 0.04517 | 0.04758 | 0            |
| Node20      | 0.04593 | 0.00804  | 0.0415  | 0.04518 | 0.04918 | 0            |
| PSN_2_MM    | 0.04497 | 0.00255  | 0.04009 | 0.04515 | 0.04747 | 0            |
| PSN_2_RN    | 0.04786 | 0.01216  | 0.04265 | 0.04524 | 0.06715 | 0            |
| Node25      | 0.04608 | 0.00683  | 0.04263 | 0.0452  | 0.05428 | 0            |
| Node19      | 0.14343 | 0.02271  | 0.12669 | 0.13041 | 0.18699 | 0            |
| PSN_2_AC    | 0.12952 | 0.00321  | 0.12519 | 0.12927 | 0.13512 | 0            |
| PSN_2_XL    | 0.1313  | 0.00837  | 0.1264  | 0.12935 | 0.17136 | 0            |
| Node28      | 0.04506 | 0.00142  | 0.04124 | 0.04515 | 0.04751 | 0            |
| Node18      | 0.18632 | 0.01813  | 0.1299  | 0.19012 | 0.20126 | 0            |
| PSN_2_DR    | 0.1318  | 0.00951  | 0.12631 | 0.12937 | 0.17406 | 0            |
| PSN_2_TF    | 0.12924 | 0.00349  | 0.12446 | 0.12924 | 0.13501 | 0            |
| Node31      | 0.18493 | 0.02053  | 0.13107 | 0.18838 | 0.19918 | 0            |

† Note: not a p-value!



## Supplementary File 6

### RESIDUE RANKS

| Alignment | Residue# | Amino acid | Variation | Rank |
|-----------|----------|------------|-----------|------|
|           | 109      | 1 M        | SE.NMQR   | 7    |
|           | 110      | 2 T        | ES.LTA    | 6    |
|           | 111      | 3 E        | TA.QRDES  | 8    |
|           | 112      | 4 L        | AL.IP     | 5    |
|           | 113      | 5 P        | SL.MPG    | 6    |
|           | 117      | 6 A        | GRM.EAS   | 7    |
|           | 118      | 7 P        | ESPL.HAVT | 9    |
|           | 119      | 8 L        | AIS.ELVQ  | 8    |
|           | 120      | 9 S        | RMTS.EVP  | 8    |
|           | 121      | 10 Y       | EAR.QYHDM | 9    |
|           | 122      | 11 F       | TGRDMAVF  | 8    |
|           | 123      | 12 Q       | EDQPKR    | 6    |
|           | 124      | 13 N       | YGQAHTNR  | 9    |
|           | 125      | 14 A       | GSENA     | 5    |
|           | 126      | 15 Q       | SEGVDTAQ  | 8    |
|           | 127      | 16 M       | DAGEM.LVT | 9    |
|           | 128      | 17 S       | NPGSV.KW  | 8    |
|           | 129      | 18 E       | DEAQ.SG   | 7    |
|           | 133      | 19 D       | ETASNDGF  | 8    |
|           | 134      | 20 N       | ENHPSRQ   | 7    |
|           | 135      | 21 H       | QSTRVHND  | 8    |
|           | 136      | 22 L       | EGVL.SP   | 7    |
|           | 137      | 23 S       | ED.TSP    | 6    |
|           | 138      | 24 N       | DP.RGNSY  | 8    |
|           | 139      | 25 T       | GL.PATE   | 7    |
|           | 140      | 26 V       | I.PSVE    | 6    |
|           | 141      | 27 R       | TE.RND    | 6    |
|           | 142      | 28 S       | VH.RASG   | 7    |
|           | 143      | 29 Q       | .DQRG     | 5    |
|           | 151      | 30 N       | SG.EN     | 5    |
|           | 152      | 31 D       | PR.SNDF   | 7    |
|           | 153      | 32 N       | PR.NGSD   | 7    |
|           | 154      | 33 R       | LA.QVPMIR | 9    |
|           | 155      | 34 E       | QT.DSE    | 6    |
|           | 157      | 35 R       | TPGFSR    | 6    |
|           | 158      | 36 Q       | RLTDNHQS  | 8    |
|           | 159      | 37 E       | EDNALSHQ  | 9    |
|           | 160      | 38 H       | EALVTHQR  | 8    |
|           | 162      | 39 N       | EVTLRASNI | 9    |
|           | 163      | 40 D       | EHNAFTSDI | 9    |
|           | 164      | 41 R       | TERVAQN   | 7    |
|           | 165      | 42 R       | ERNPAQIV  | 8    |
|           | 166      | 43 S       | QLSNVGPR  | 9    |
|           | 167      | 44 L       | KLQVRTPEI | 9    |
|           | 168      | 45 G       | DSEVTGN   | 7    |
|           | 169      | 46 H       | DAMNVRHS  | 8    |

|     |      |           |    |
|-----|------|-----------|----|
| 170 | 47 P | EGRNQPTD  | 8  |
| 171 | 48 E | QRNED     | 5  |
| 172 | 49 P | SEVPGRA   | 7  |
| 173 | 50 L | CNVRAEIL  | 8  |
| 174 | 51 S | GSENLD    | 6  |
| 175 | 52 N | MV.STANR  | 8  |
| 176 | 53 G | KN.RVG    | 6  |
| 177 | 54 R | Y.PQNREI  | 8  |
| 181 | 55 P | KT.SPRAQ  | 8  |
| 182 | 56 Q | IA.RPQG   | 7  |
| 183 | 57 G | LE.QATNSG | 10 |
| 184 | 58 N | NE.TPASG  | 8  |
| 185 | 59 S | VR.GLQPTS | 9  |
| 188 | 60 R | SR.GQH    | 6  |
| 189 | 61 Q | FI.GSRVQT | 9  |
| 190 | 62 V | GR.SMEVI  | 8  |
| 191 | 63 V | DA.GNRTVC | 9  |
| 192 | 64 E | DR.GVEHQ  | 8  |
| 193 | 65 Q | GQ.PVSRH  | 8  |
| 194 | 66 D | DE.P      | 4  |
| 195 | 67 E | DE.TSP    | 6  |
| 196 | 68 E | PA.NEMD   | 7  |
| 197 | 69 E | TA.ED     | 5  |
| 198 | 70 D | SR.MDE    | 6  |
| 199 | 71 E | ER.D      | 4  |
| 202 | 72 E | ED        | 2  |
| 203 | 73 L | ELAQM     | 5  |
| 204 | 74 T | ADEGMT    | 6  |
| 205 | 75 L | L         | 1  |
| 206 | 76 K | RKQ       | 3  |
| 207 | 77 Y | FY        | 2  |
| 208 | 78 G | GD        | 2  |
| 209 | 79 A | A         | 1  |
| 210 | 80 K | QESK      | 4  |
| 211 | 81 H | QSH       | 3  |
| 212 | 82 V | MV        | 2  |
| 213 | 83 I | IL        | 2  |
| 214 | 84 M | LAHKM     | 5  |
| 215 | 85 L | L         | 1  |
| 216 | 86 F | IF        | 2  |
| 217 | 87 V | FKVIA     | 5  |
| 218 | 88 P | P         | 1  |
| 219 | 89 V | V         | 1  |
| 220 | 90 T | FST       | 3  |
| 221 | 91 L | IAL       | 3  |
| 222 | 92 C | C         | 1  |
| 223 | 93 M | ML        | 2  |
| 224 | 94 V | AILV      | 4  |
| 225 | 95 V | LV        | 2  |

|     |       |          |   |
|-----|-------|----------|---|
| 226 | 96 V  | V        | 1 |
| 227 | 97 V  | VI       | 2 |
| 228 | 98 A  | AF       | 2 |
| 229 | 99 T  | IT       | 2 |
| 230 | 100 I | QIMV     | 4 |
| 231 | 101 K | LRNSKG   | 6 |
| 232 | 102 S | STA      | 3 |
| 233 | 103 V | VI       | 2 |
| 234 | 104 S | ETS      | 3 |
| 235 | 105 F | KYF      | 3 |
| 236 | 106 Y | NFY      | 3 |
| 237 | 107 T | VSNT     | 4 |
| 238 | 108 R | TQSERD   | 6 |
| 239 | 109 K | SNT.KD   | 6 |
| 240 | 110 D | SDNA     | 4 |
| 241 | 111 G | GTV      | 3 |
| 244 | 112 Q | TQHY     | 4 |
| 245 | 113 L | LF       | 2 |
| 246 | 114 I | IALV     | 4 |
| 247 | 115 Y | Y        | 1 |
| 248 | 116 T | T        | 1 |
| 249 | 117 P | P        | 1 |
| 250 | 118 F | F        | 1 |
| 251 | 119 T | DEVHRT   | 6 |
| 252 | 120 E | ESR      | 3 |
| 253 | 121 D | DNEQK    | 5 |
| 254 | 122 T | TGSK     | 4 |
| 255 | 123 E | AGDPNE   | 6 |
| 259 | 124 T | NSEQTG   | 6 |
| 260 | 125 V | DSIPHAVT | 8 |
| 261 | 126 G | GVSA     | 4 |
| 262 | 127 Q | FEVTQS   | 6 |
| 263 | 128 R | VRK      | 3 |
| 264 | 129 A | LFGAV    | 5 |
| 265 | 130 L | LGW      | 3 |
| 266 | 131 H | FGMSQNH  | 8 |
| 267 | 132 S | AS       | 2 |
| 268 | 133 I | LVMIF    | 5 |
| 269 | 134 L | ALG      | 3 |
| 270 | 135 N | N        | 1 |
| 271 | 136 A | VAS      | 3 |
| 272 | 137 A | ALIV     | 4 |
| 273 | 138 I | IV       | 2 |
| 274 | 139 M | VMLI     | 4 |
| 275 | 140 I | IVLM     | 4 |
| 276 | 141 S | TGCS     | 4 |
| 277 | 142 V | LIV      | 3 |
| 278 | 143 I | VI       | 2 |
| 279 | 144 V | VIL      | 3 |

|     |       |        |   |
|-----|-------|--------|---|
| 280 | 145 V | VLI    | 3 |
| 281 | 146 M | M      | 1 |
| 282 | 147 T | T      | 1 |
| 283 | 148 I | IFVL   | 4 |
| 284 | 149 L | ILFV   | 4 |
| 285 | 150 L | L      | 1 |
| 286 | 151 V | VI     | 2 |
| 287 | 152 V | CMVI   | 4 |
| 288 | 153 L | LF     | 2 |
| 289 | 154 Y | Y      | 1 |
| 290 | 155 K | KI     | 2 |
| 291 | 156 Y | YKC    | 3 |
| 292 | 157 R | REK    | 3 |
| 293 | 158 C | CYF    | 3 |
| 294 | 159 Y | Y      | 1 |
| 295 | 160 K | KR     | 2 |
| 296 | 161 V | ILVF   | 4 |
| 297 | 162 I | I      | 1 |
| 298 | 163 H | YHEQ   | 4 |
| 299 | 164 A | GA     | 2 |
| 300 | 165 W | W      | 1 |
| 301 | 166 L | L      | 1 |
| 302 | 167 I | VAIF   | 4 |
| 303 | 168 I | VLFI   | 4 |
| 304 | 169 S | AS     | 2 |
| 305 | 170 S | SAN    | 3 |
| 306 | 171 L | ALF    | 3 |
| 307 | 172 L | LMF    | 3 |
| 308 | 173 L | L      | 1 |
| 309 | 174 L | L      | 1 |
| 310 | 175 F | FY     | 2 |
| 311 | 176 F | VFLI   | 4 |
| 312 | 177 F | F      | 1 |
| 313 | 178 S | STA    | 3 |
| 314 | 179 F | SYTFL  | 5 |
| 315 | 180 I | FQIL   | 4 |
| 316 | 181 Y | FY     | 2 |
| 317 | 182 L | FIVL   | 4 |
| 318 | 183 G | VEQG   | 4 |
| 326 | 184 E | EQ     | 2 |
| 327 | 185 V | VL     | 2 |
| 328 | 186 F | LF     | 2 |
| 329 | 187 K | QIKRVS | 6 |
| 330 | 188 T | VAST   | 4 |
| 331 | 189 Y | HFY    | 3 |
| 332 | 190 N | YND    | 3 |
| 333 | 191 V | LAVI   | 4 |
| 334 | 192 A | FSPA   | 4 |
| 335 | 193 V | IPMVC  | 5 |

|     |       |        |   |
|-----|-------|--------|---|
| 336 | 194 D | DS     | 2 |
| 337 | 195 Y | WAY    | 3 |
| 338 | 196 I | PILFV  | 5 |
| 339 | 197 T | STL    | 3 |
| 340 | 198 V | FMVAIL | 6 |
| 341 | 199 A | LAVT   | 4 |
| 342 | 200 L | VFLI   | 4 |
| 343 | 201 L | LIGMVF | 6 |
| 344 | 202 I | ILM    | 3 |
| 345 | 203 W | WG     | 2 |
| 346 | 204 N | N      | 1 |
| 347 | 205 F | FY     | 2 |
| 348 | 206 G | G      | 1 |
| 349 | 207 V | GTVMA  | 5 |
| 350 | 208 V | MVL    | 3 |
| 351 | 209 G | G      | 1 |
| 352 | 210 M | VFM    | 3 |
| 353 | 211 I | LIMV   | 4 |
| 354 | 212 S | VACS   | 4 |
| 355 | 213 I | I      | 1 |
| 356 | 214 H | HF     | 2 |
| 357 | 215 W | W      | 1 |
| 358 | 216 K | KRQ    | 3 |
| 359 | 217 G | GS     | 2 |
| 360 | 218 P | P      | 1 |
| 361 | 219 L | L      | 1 |
| 362 | 220 R | RALH   | 4 |
| 363 | 221 L | LV     | 2 |
| 364 | 222 Q | Q      | 1 |
| 365 | 223 Q | Q      | 1 |
| 366 | 224 A | AVFGL  | 5 |
| 367 | 225 Y | Y      | 1 |
| 368 | 226 L | L      | 1 |
| 369 | 227 I | IV     | 2 |
| 370 | 228 M | FITVM  | 5 |
| 371 | 229 I | CVMI   | 4 |
| 372 | 230 S | SA     | 2 |
| 373 | 231 A | A      | 1 |
| 374 | 232 L | L      | 1 |
| 375 | 233 M | TM     | 2 |
| 376 | 234 A | A      | 1 |
| 377 | 235 L | NL     | 2 |
| 378 | 236 V | IV     | 2 |
| 379 | 237 F | FL     | 2 |
| 380 | 238 I | VI     | 2 |
| 381 | 239 K | K      | 1 |
| 382 | 240 Y | YN     | 2 |
| 383 | 241 L | L      | 1 |
| 384 | 242 P | P      | 1 |

|     |       |        |   |
|-----|-------|--------|---|
| 385 | 243 E | NDE    | 3 |
| 386 | 244 W | W      | 1 |
| 387 | 245 T | T      | 1 |
| 388 | 246 A | ATVL   | 4 |
| 389 | 247 W | W      | 1 |
| 390 | 248 L | IVFATL | 6 |
| 391 | 249 I | LVI    | 3 |
| 392 | 250 L | L      | 1 |
| 393 | 251 A | AFG    | 3 |
| 394 | 252 V | AV     | 2 |
| 395 | 253 I | IV     | 2 |
| 396 | 254 S | SA     | 2 |
| 397 | 255 V | LIV    | 3 |
| 398 | 256 Y | YW     | 2 |
| 399 | 257 D | D      | 1 |
| 400 | 258 L | L      | 1 |
| 401 | 259 V | IFVL   | 4 |
| 402 | 260 A | A      | 1 |
| 403 | 261 V | V      | 1 |
| 404 | 262 L | L      | 1 |
| 405 | 263 C | CST    | 3 |
| 406 | 264 P | P      | 1 |
| 407 | 265 K | KCR    | 3 |
| 408 | 266 G | G      | 1 |
| 409 | 267 P | P      | 1 |
| 410 | 268 L | L      | 1 |
| 411 | 269 R | RK     | 2 |
| 412 | 270 M | VCYIM  | 5 |
| 413 | 271 L | L      | 1 |
| 414 | 272 V | V      | 1 |
| 415 | 273 E | EQ     | 2 |
| 416 | 274 T | TV     | 2 |
| 417 | 275 A | A      | 1 |
| 418 | 276 Q | RQ     | 2 |
| 419 | 277 E | E      | 1 |
| 420 | 278 R | R      | 1 |
| 421 | 279 N | ND     | 2 |
| 422 | 280 E | EQ     | 2 |
| 423 | 281 T | TPQA   | 4 |
| 424 | 282 L | IL     | 2 |
| 425 | 283 F | F      | 1 |
| 426 | 284 P | P      | 1 |
| 427 | 285 A | SA     | 2 |
| 428 | 286 L | L      | 1 |
| 429 | 287 I | I      | 1 |
| 430 | 288 Y | Y      | 1 |
| 431 | 289 S | S      | 1 |
| 432 | 290 S | TS     | 2 |
| 433 | 291 T | TG     | 2 |

|     |       |           |    |
|-----|-------|-----------|----|
| 434 | 292 M | MVF       | 3  |
| 435 | 293 V | VMI       | 3  |
| 436 | 294 W | WY        | 2  |
| 437 | 295 L | LTPAF     | 5  |
| 438 | 296 V | VYLTF     | 5  |
| 439 | 297 N | GTVN      | 4  |
| 450 | 298 M | MLTV      | 4  |
| 451 | 299 A | AVN       | 3  |
| 452 | 300 E | DTSQE     | 5  |
| 453 | 301 G | RVASIEGN  | 8  |
| 454 | 302 D | PGVSQDAN  | 8  |
| 455 | 303 P | TDEPS     | 5  |
| 456 | 304 E | NSAPTE    | 6  |
| 457 | 305 A | KSTPRAQ   | 7  |
| 458 | 306 Q | KSTPNQR   | 7  |
| 459 | 307 R | KNDSRP    | 6  |
| 460 | 308 R | DSPQRK    | 6  |
| 461 | 309 V | KARTSV    | 6  |
| 462 | 310 S | KTEAHP    | 7  |
| 463 | 311 K | NIPTLK    | 6  |
| 464 | 312 N | TEQVSNK   | 7  |
| 465 | 313 S | DSREPK    | 6  |
| 466 | 314 K | DQSANPTK  | 8  |
| 467 | 315 Y | TPDQYRN   | 7  |
| 468 | 316 N | SRQDVENK  | 8  |
| 469 | 317 A | GVNDEKAT  | 8  |
| 470 | 318 E | SATNEQD   | 7  |
| 471 | 319 S | SDLHVRGE  | 8  |
| 482 | 320 T | ETSQ.ADL  | 8  |
| 483 | 321 E | GSERDA.   | 7  |
| 484 | 322 R | GMTEVNSR  | 9  |
| 485 | 323 E | GSPEAQ    | 6  |
| 486 | 324 S | ESKNMTAI  | 8  |
| 487 | 325 Q | RQSNA     | 5  |
| 488 | 326 D | EPHITND   | 7  |
| 489 | 327 T | GRKP.TAS  | 8  |
| 490 | 328 V | RAV.G     | 5  |
| 491 | 329 A | RKQ.ATS   | 7  |
| 492 | 330 E | DQRN.EAG\ | 9  |
| 493 | 331 N | NGIQ.DETS | 10 |
| 494 | 332 D | DSPR.QG   | 7  |
| 495 | 333 D | DRQ.TE    | 6  |
| 504 | 334 G | G.        | 2  |
| 522 | 335 G | .G        | 2  |
| 523 | 336 F | .F        | 2  |
| 524 | 337 S | .TDSG     | 5  |
| 525 | 338 E | .QTPE     | 5  |
| 526 | 339 E | .EVAD     | 5  |
| 527 | 340 W | .WF       | 3  |

|     |       |          |   |
|-----|-------|----------|---|
| 528 | 341 E | .STVEN   | 6 |
| 529 | 342 A | .AEDQN   | 6 |
| 530 | 343 Q | .NRHQS   | 6 |
| 531 | 344 R | .LRQ     | 4 |
| 534 | 345 D | DAKRQ    | 5 |
| 535 | 346 S | DVQLHNSP | 8 |
| 536 | 347 H | DSQAERHT | 9 |
| 537 | 348 L | TEIRLQ   | 6 |
| 538 | 349 G | DAERSGT  | 7 |
| 539 | 350 P | GDSQPA   | 6 |
| 540 | 351 H | IDNMLHT  | 7 |
| 541 | 352 R | EGTLSQHR | 9 |
| 551 | 353 S | TPVQNSE  | 7 |
| 552 | 354 T | NREST    | 5 |
| 553 | 355 P | RGVSQEPA | 8 |
| 554 | 356 E | END      | 3 |
| 555 | 357 S | RTEVSA   | 6 |
| 556 | 358 R | REY      | 3 |
| 557 | 359 A | RSLAQ    | 5 |
| 558 | 360 A | ETAQV    | 5 |
| 559 | 361 V | RNAVI    | 5 |
| 560 | 362 Q | QET.RS   | 6 |
| 561 | 363 E | QAR.EDN  | 7 |
| 562 | 364 L | QAP.LM   | 6 |
| 563 | 365 S | QPTD.RS  | 7 |
| 564 | 366 S | QAV.SGNR | 8 |
| 579 | 367 S | QS.TRAD  | 7 |
| 582 | 368 I | ESN.PIMT | 8 |
| 583 | 369 L | EFNTVPL  | 7 |
| 584 | 370 A | EQHDPGAT | 8 |
| 585 | 371 G | EPRSAGDL | 8 |
| 586 | 372 E | EDH      | 3 |
| 587 | 373 D | EDG      | 3 |
| 588 | 374 P | QEPD     | 4 |
| 589 | 375 E | ED       | 2 |
| 590 | 376 E | ED       | 2 |
| 591 | 377 R | RS       | 2 |
| 593 | 378 G | G        | 1 |
| 594 | 379 V | FVI      | 3 |
| 595 | 380 K | K        | 1 |
| 596 | 381 L | L        | 1 |
| 597 | 382 G | G        | 1 |
| 598 | 383 L | L        | 1 |
| 599 | 384 G | G        | 1 |
| 600 | 385 D | D        | 1 |
| 601 | 386 F | F        | 1 |
| 602 | 387 I | I        | 1 |
| 603 | 388 F | F        | 1 |
| 604 | 389 Y | Y        | 1 |



|     |       |       |   |
|-----|-------|-------|---|
| 605 | 390 S | S     | 1 |
| 606 | 391 V | IVM   | 3 |
| 607 | 392 L | L     | 1 |
| 608 | 393 V | VL    | 2 |
| 609 | 394 G | G     | 1 |
| 610 | 395 K | K     | 1 |
| 611 | 396 A | A     | 1 |
| 612 | 397 S | AS    | 2 |
| 613 | 398 A | HTSA  | 4 |
| 614 | 399 T | D.T   | 3 |
| 615 | 400 A | S.A   | 3 |
| 616 | 401 S | TAYSN | 5 |
| 617 | 402 G | GHFK  | 4 |
| 618 | 403 D | DE    | 2 |
| 619 | 404 W | W     | 1 |
| 620 | 405 N | VTN   | 3 |
| 621 | 406 T | VT    | 2 |
| 622 | 407 T | IT    | 2 |
| 623 | 408 I | SLI   | 3 |
| 624 | 409 A | SA    | 2 |
| 625 | 410 C | C     | 1 |
| 626 | 411 F | FY    | 2 |
| 627 | 412 V | V     | 1 |
| 628 | 413 A | A     | 1 |
| 629 | 414 I | I     | 1 |
| 630 | 415 L | L     | 1 |
| 631 | 416 I | I     | 1 |
| 632 | 417 G | G     | 1 |
| 633 | 418 L | L     | 1 |
| 634 | 419 C | CA    | 2 |
| 635 | 420 L | MCFL  | 4 |
| 636 | 421 T | T     | 1 |
| 637 | 422 L | IL    | 2 |
| 638 | 423 L | ILV   | 3 |
| 639 | 424 L | IL    | 2 |
| 640 | 425 L | L     | 1 |
| 641 | 426 A | GSA   | 3 |
| 642 | 427 I | IV    | 2 |
| 643 | 428 F | VFWY  | 4 |
| 644 | 429 K | RK    | 2 |
| 645 | 430 K | RK    | 2 |
| 646 | 431 A | A     | 1 |
| 647 | 432 L | L     | 1 |
| 648 | 433 P | P     | 1 |
| 649 | 434 A | A     | 1 |
| 650 | 435 L | L     | 1 |
| 651 | 436 P | P     | 1 |
| 652 | 437 I | IV    | 2 |
| 653 | 438 S | S     | 1 |

|     |       |          |   |
|-----|-------|----------|---|
| 654 | 439 I | I        | 1 |
| 655 | 440 T | FTA      | 3 |
| 656 | 441 F | CFS      | 3 |
| 657 | 442 G | G        | 1 |
| 658 | 443 L | L        | 1 |
| 659 | 444 V | ICV      | 3 |
| 660 | 445 F | F        | 1 |
| 661 | 446 Y | YFCN     | 4 |
| 662 | 447 F | F        | 1 |
| 663 | 448 A | SLCAT    | 5 |
| 664 | 449 T | ST       | 2 |
| 665 | 450 D | QSRDA    | 5 |
| 666 | 451 Y | YEWAN    | 5 |
| 667 | 452 L | VIFL     | 4 |
| 668 | 453 V | ILV      | 3 |
| 669 | 454 Q | ADTKFRQS | 8 |
| 670 | 455 P | P        | 1 |
| 671 | 456 F | FL       | 2 |
| 672 | 457 M | AIVMT    | 5 |
| 673 | 458 D | QDTE     | 4 |
| 674 | 459 Q | VRQDHEAT | 8 |
| 675 | 460 L | LV       | 2 |
| 676 | 461 A | ANS      | 3 |
| 677 | 462 F | TEQAGSVY | 9 |
| 678 | 463 H | TRKEQH   | 6 |
| 679 | 464 Q | QC       | 2 |
| 680 | 465 F | TILVAF   | 6 |
| 681 | 466 Y | FLY      | 3 |
| 682 | 467 I | ILYV     | 4 |
